# Supplementary material for: Monitoring Cell-Type–Specific Gene Expression Using Ribosome Profiling In Vivo During Cardiac Hemodynamic Stress
Source: PubMed Central journal article supplement — Circ Res. 2019 Jul 9;125(4):431–48. doi: 10.1161/CIRCRESAHA.119.314817 (PMC6690133; doi:10.1161/circresaha.119.314817), 2019-07-09

# sham-tac-542, Uniquely aligned reads

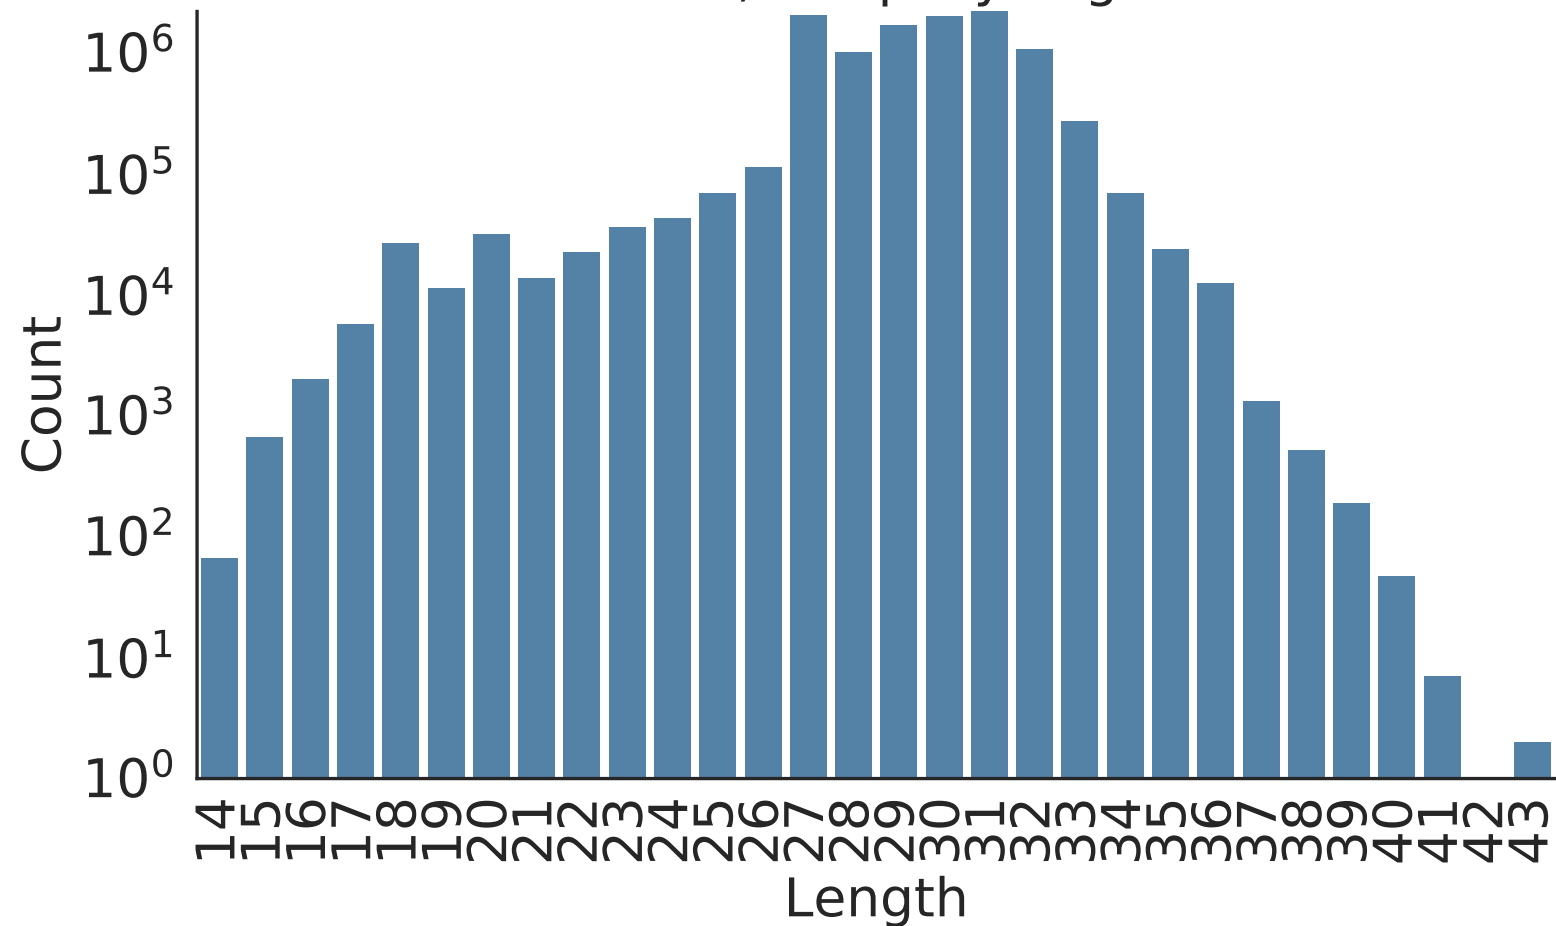

# sham-tac-745, Uniquely aligned reads

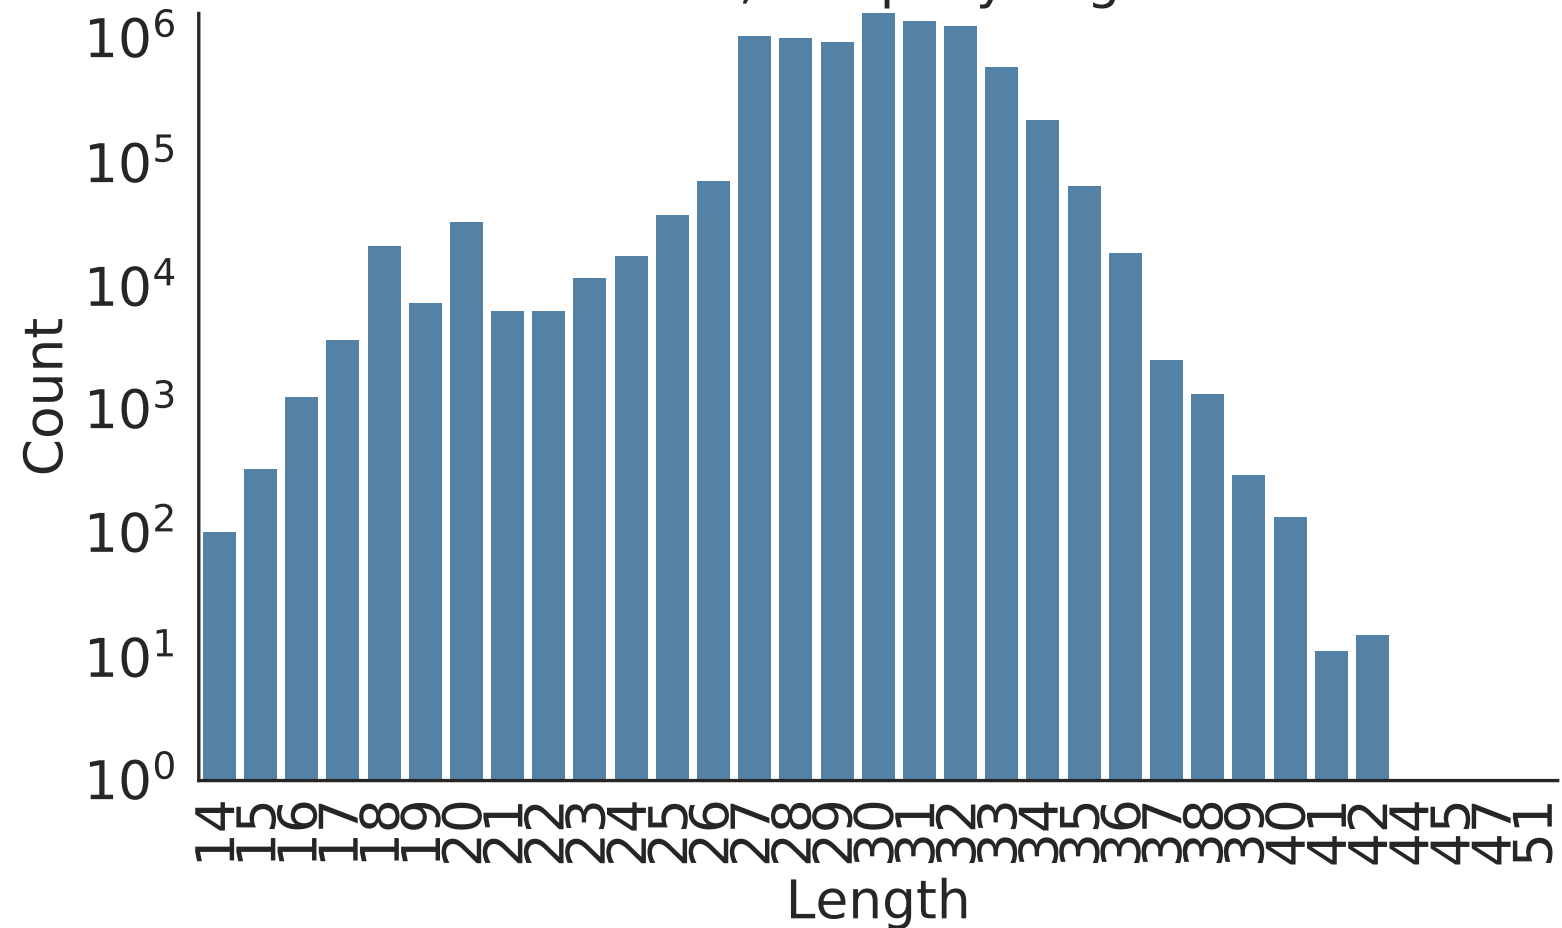

# sham-tac-574, Uniquely aligned reads

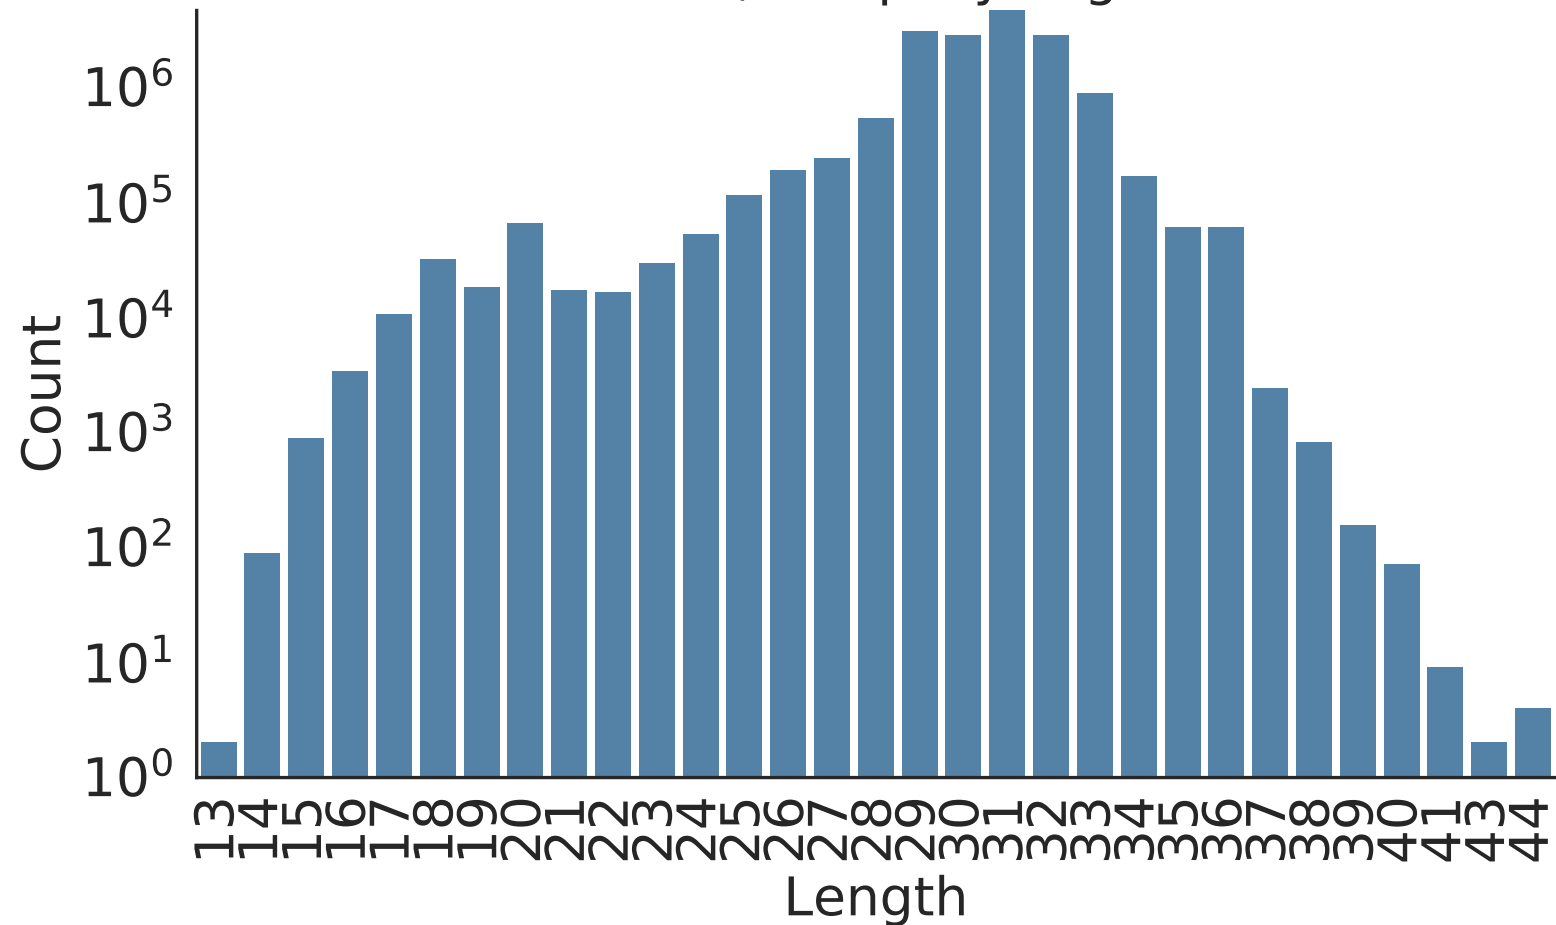

# sham-tac-716, Uniquely aligned reads

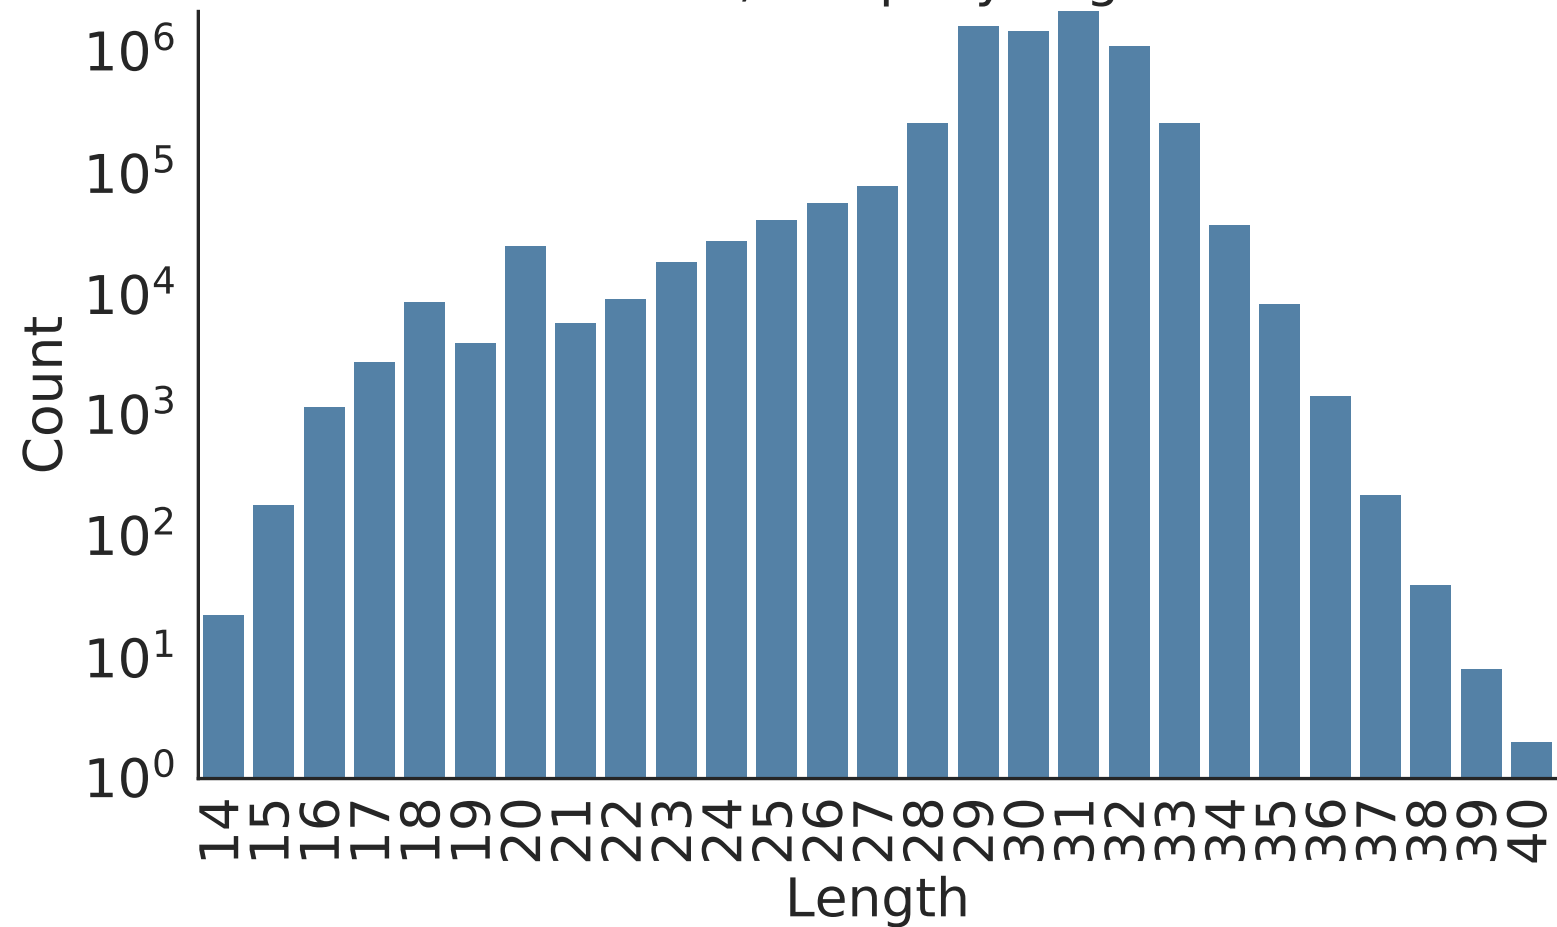

tac-2d-717, Uniquely aligned reads

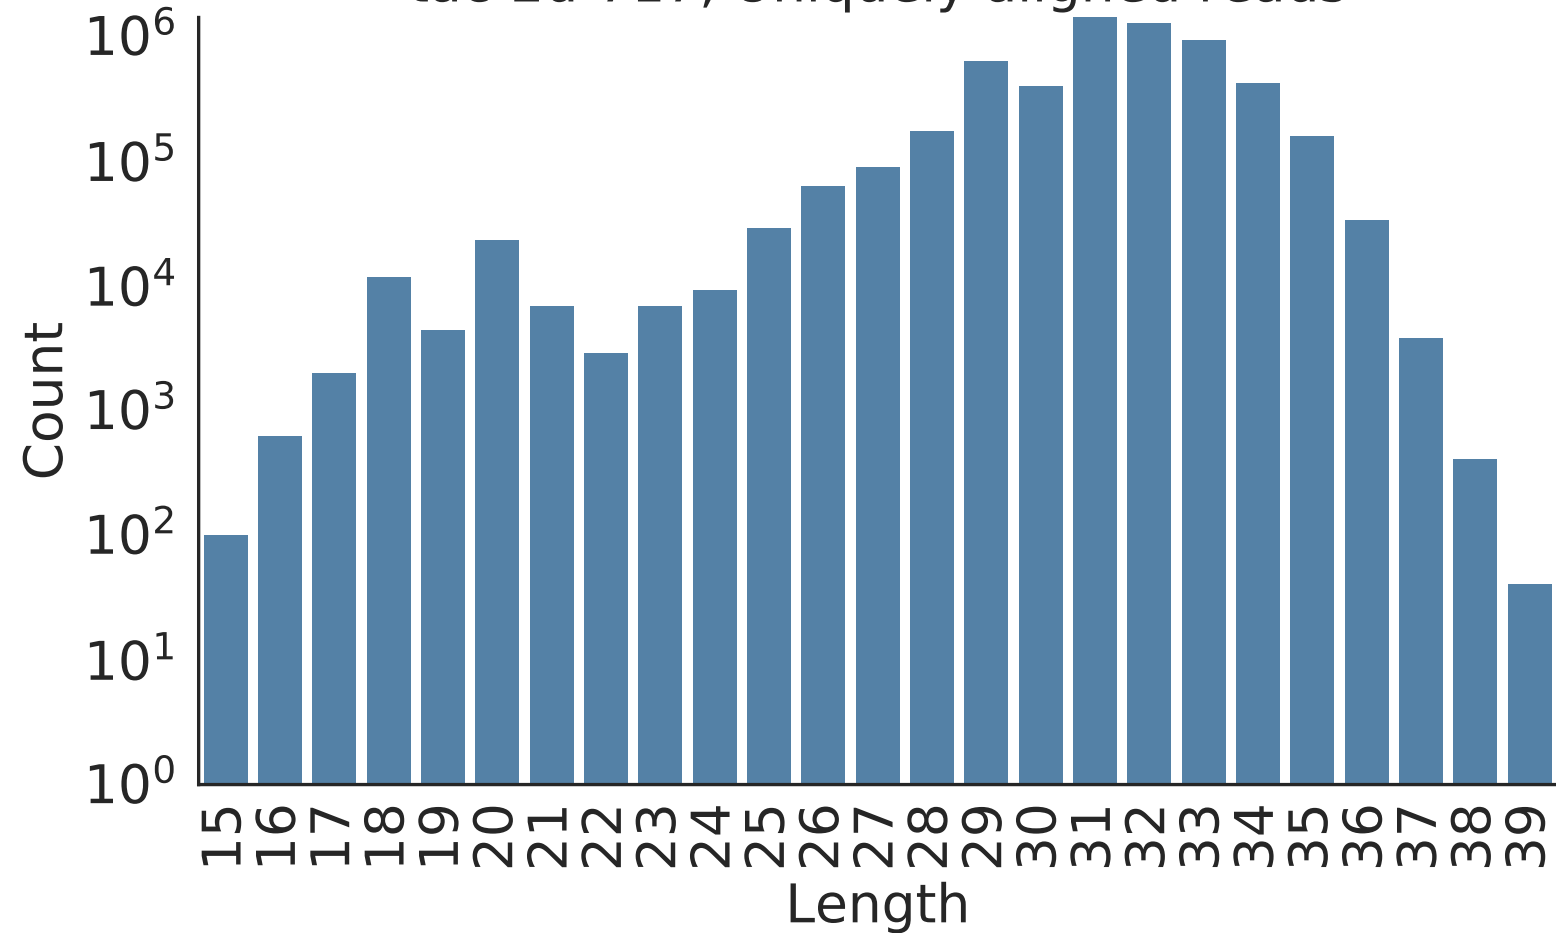

tac-2d-723, Uniquely aligned reads

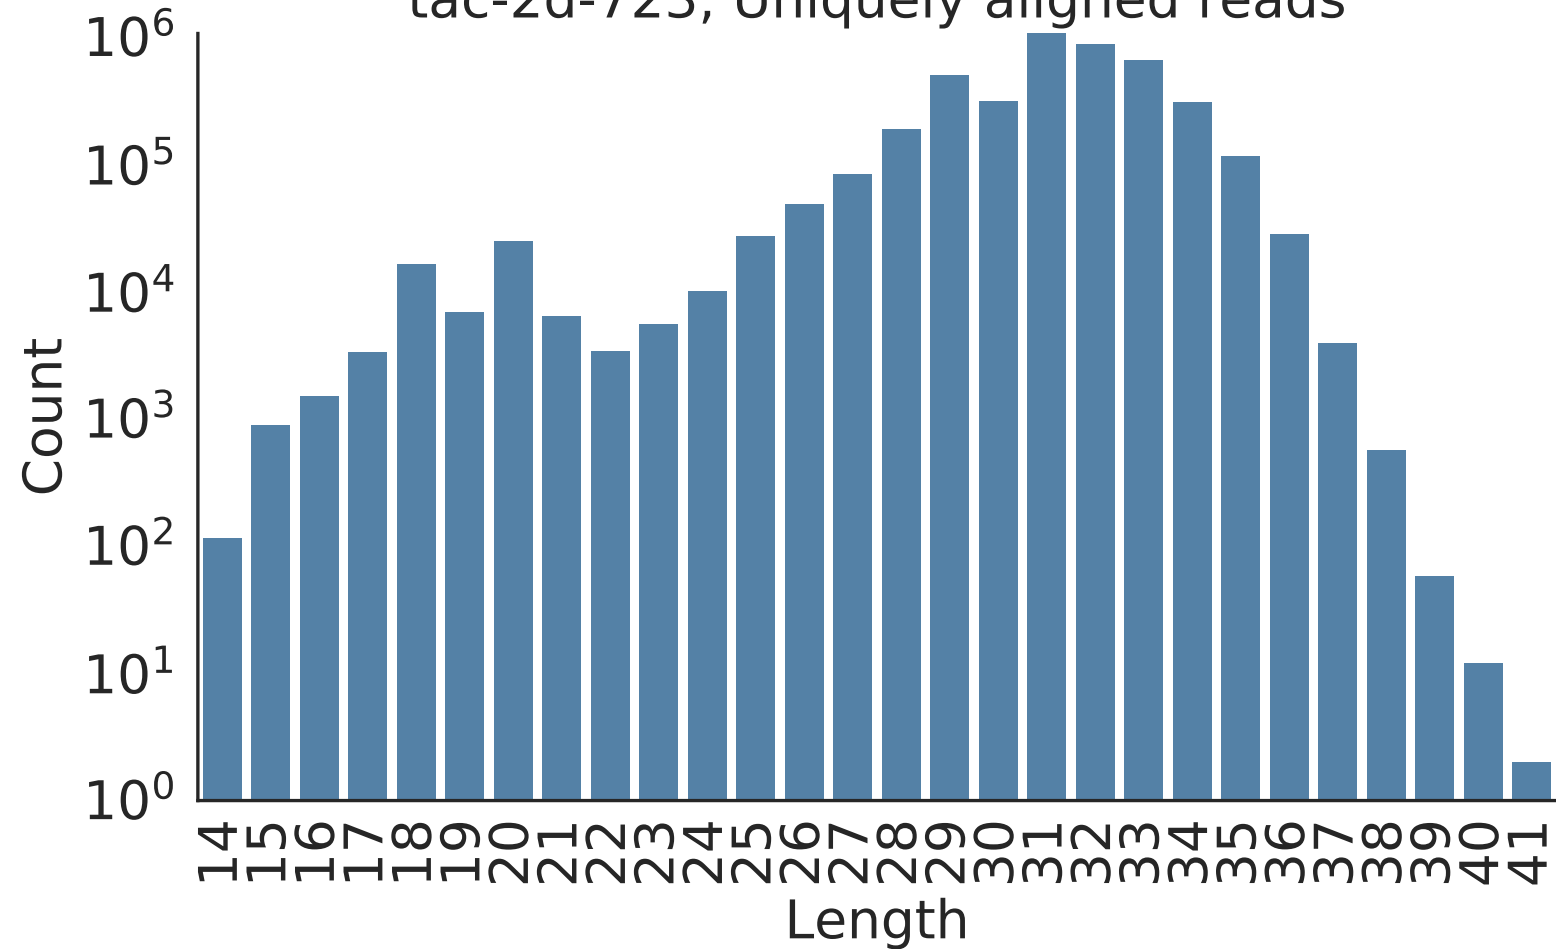

# tac-2w-677, Uniquely aligned reads

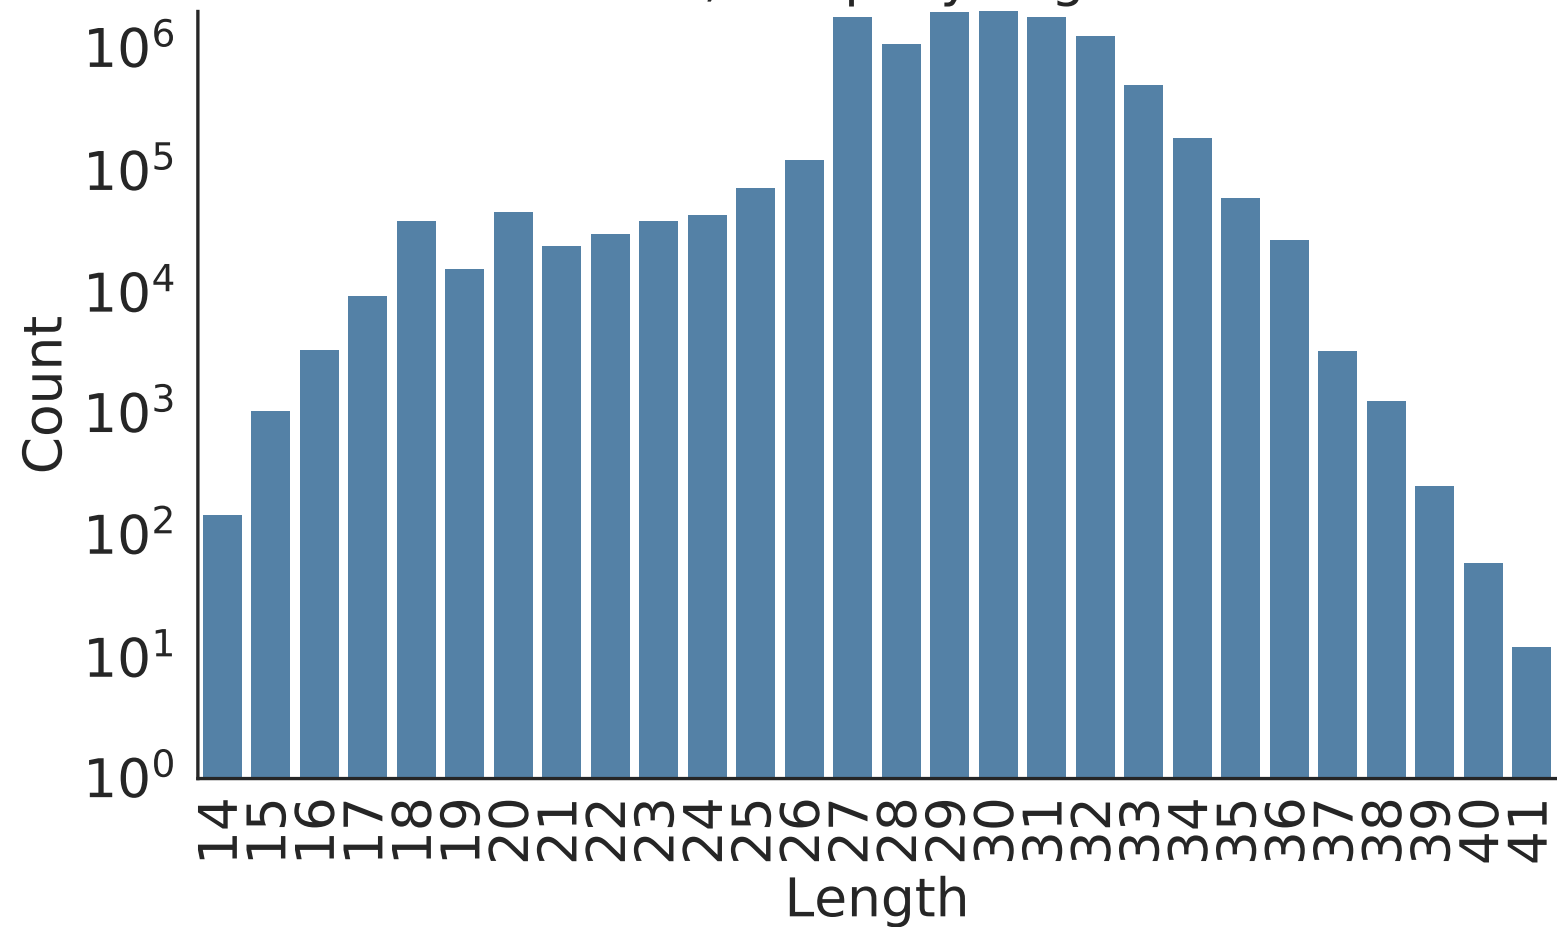

# tac-2w-710, Uniquely aligned reads

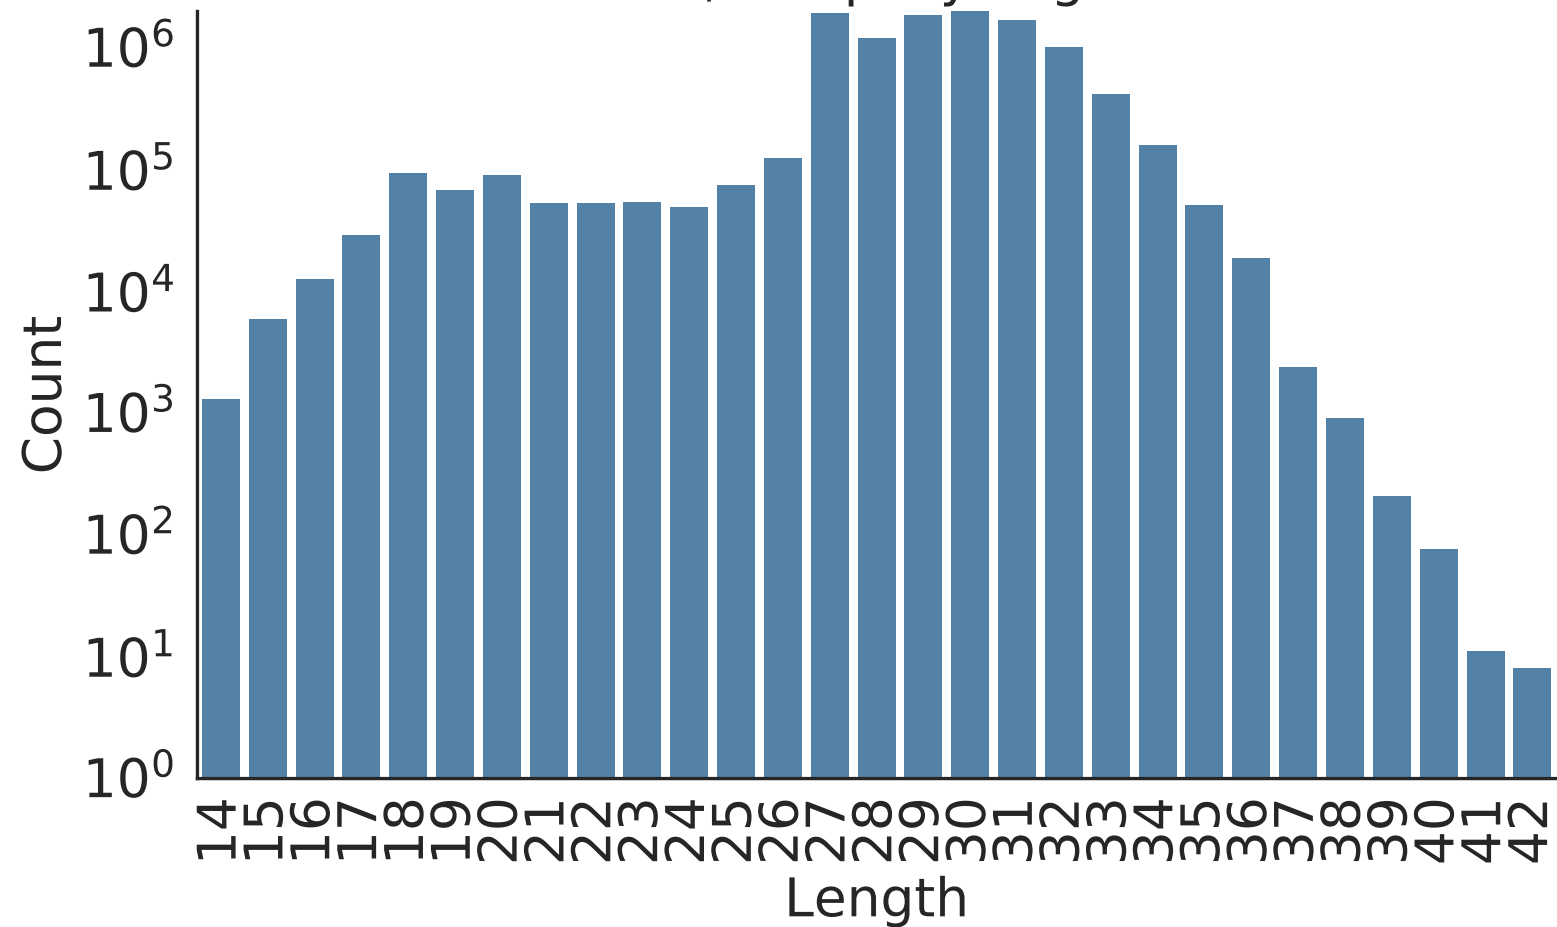



# tac-2w-712, Uniquely aligned reads

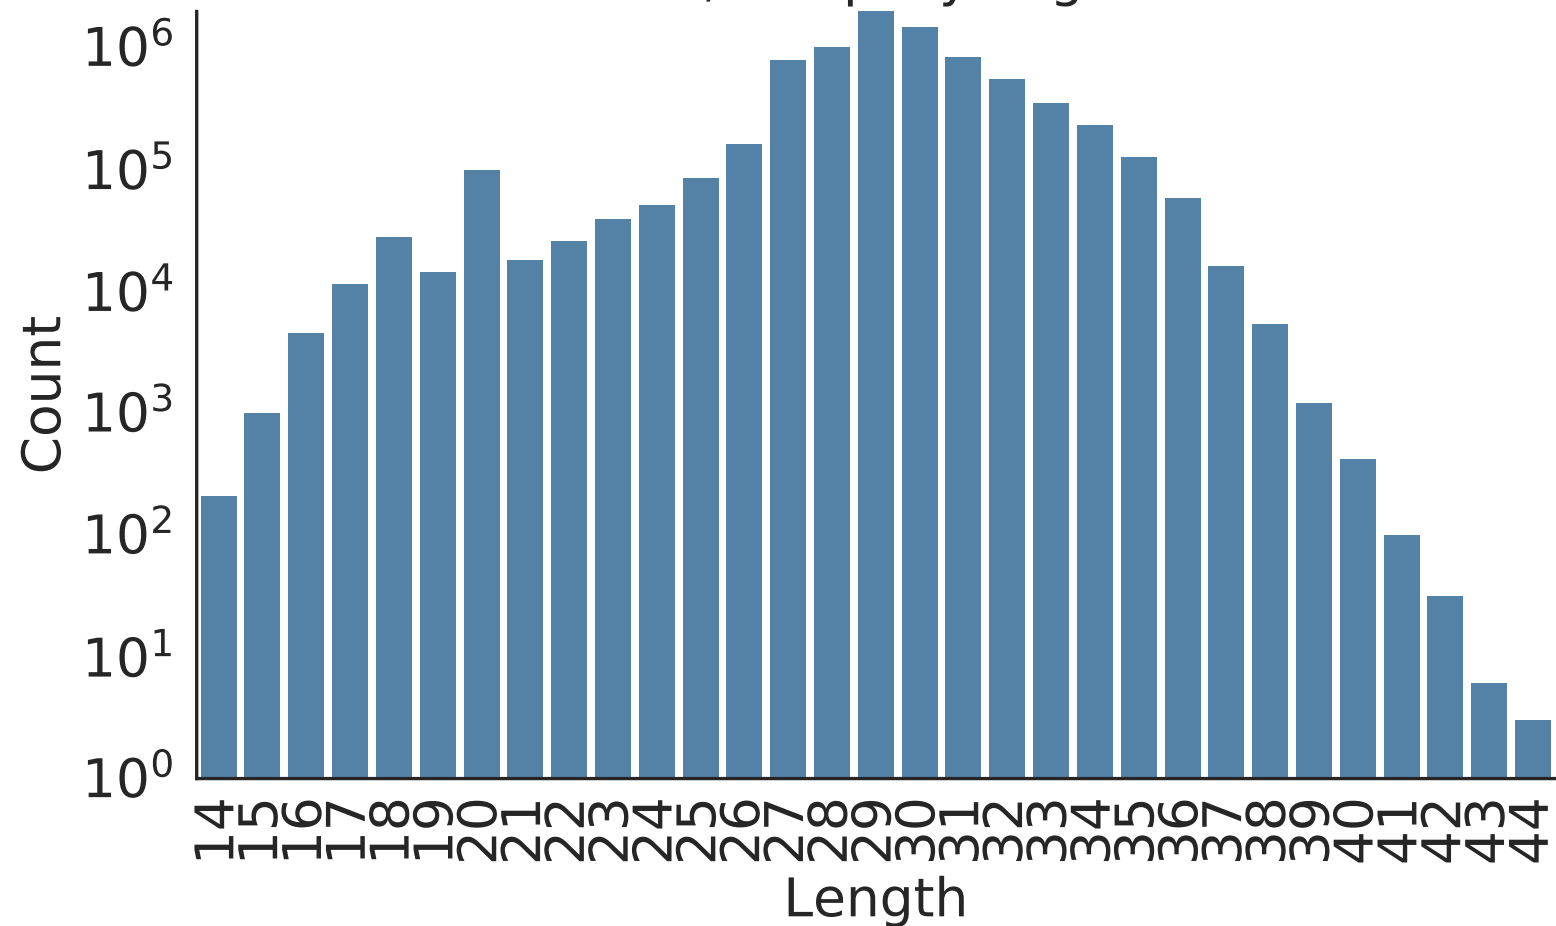

# tac-3h-589, Uniquely aligned reads

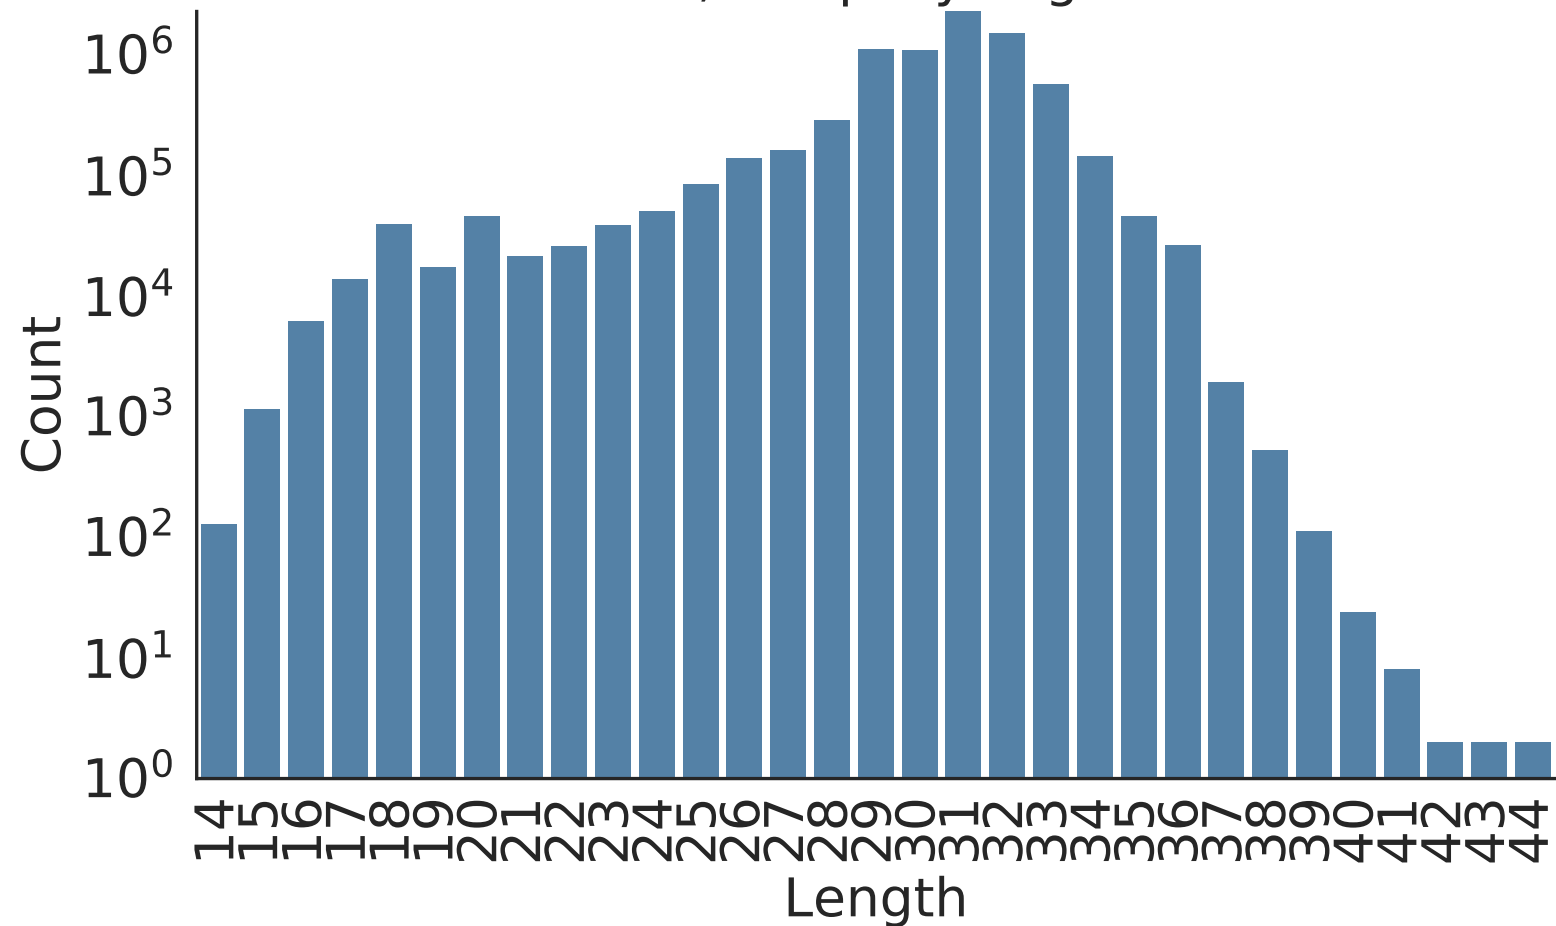

# tac-3h-590, Uniquely aligned reads

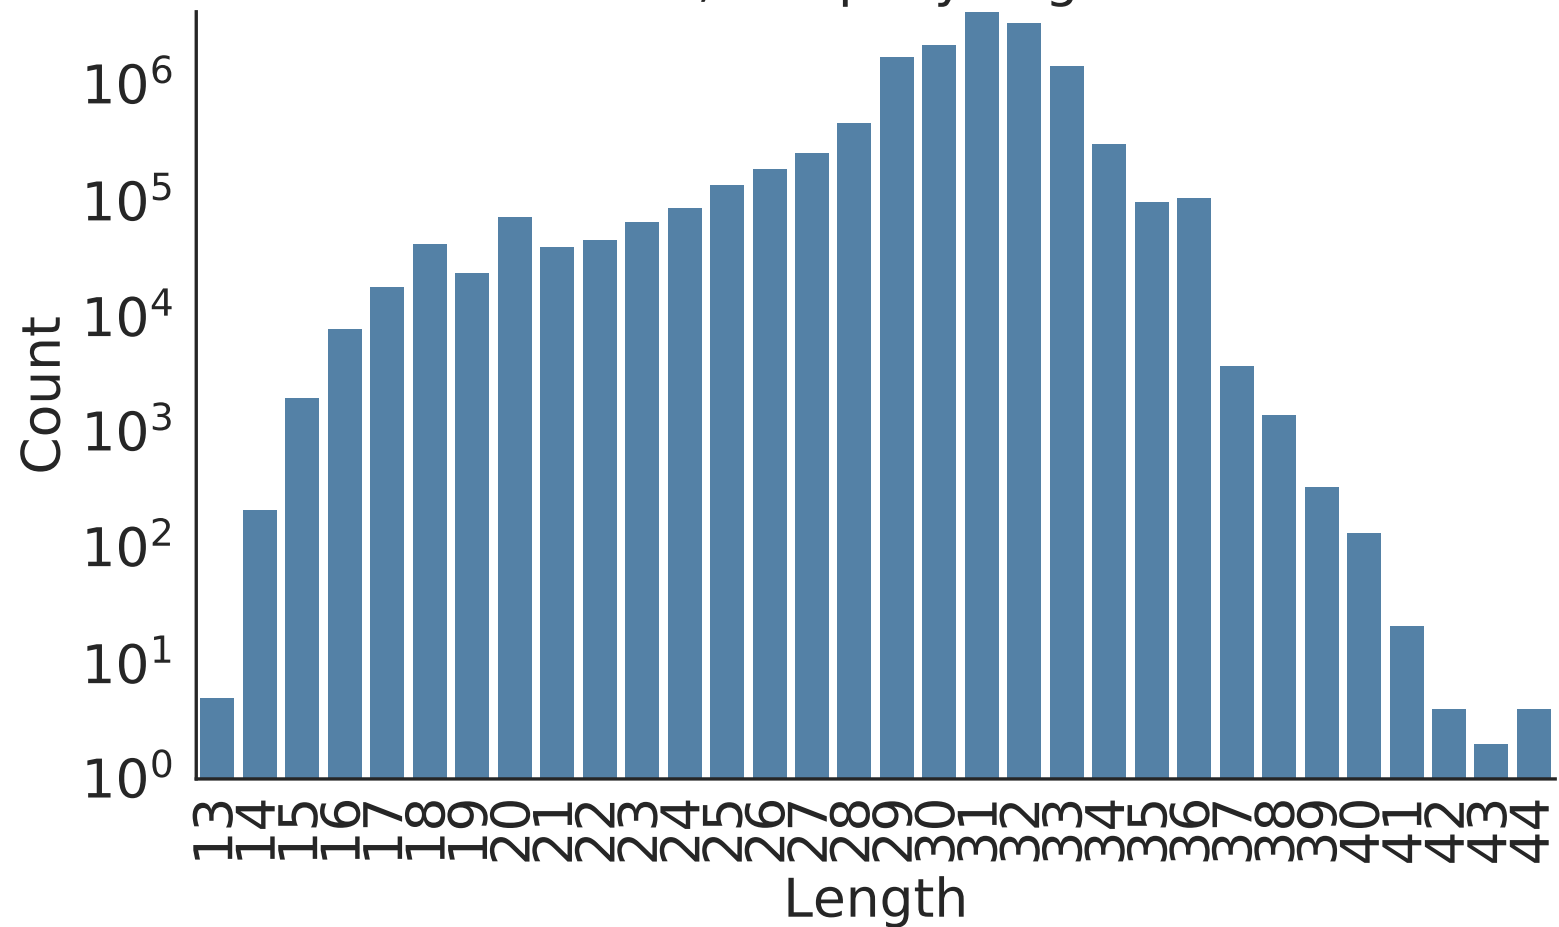

# tac-3h-591, Uniquely aligned reads

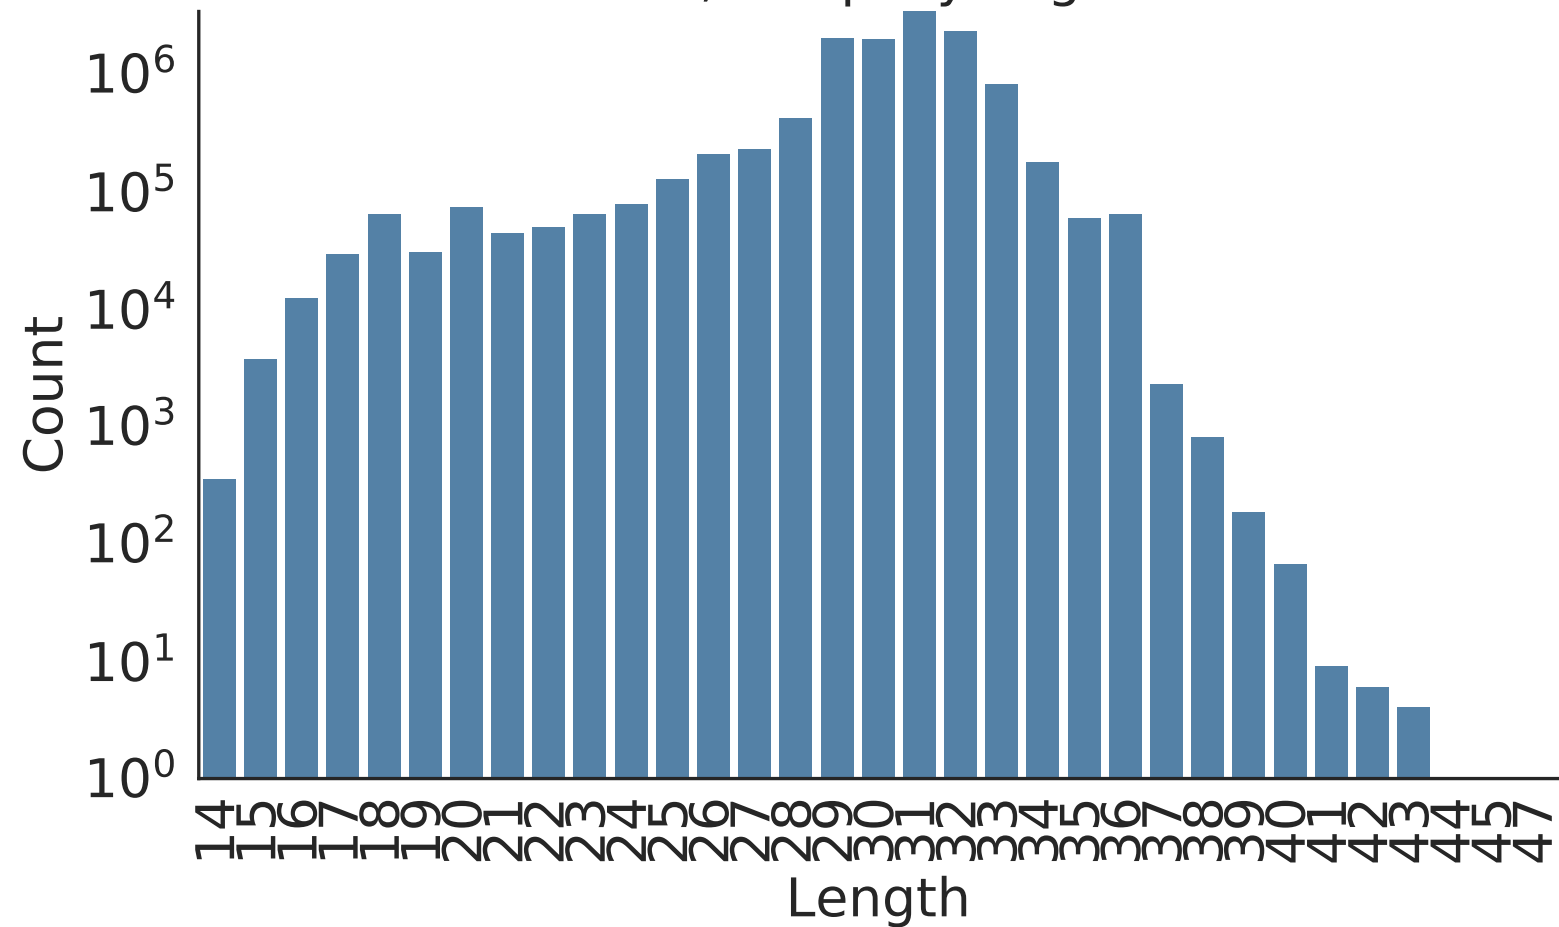

# LV1S4, Uniquely aligned reads

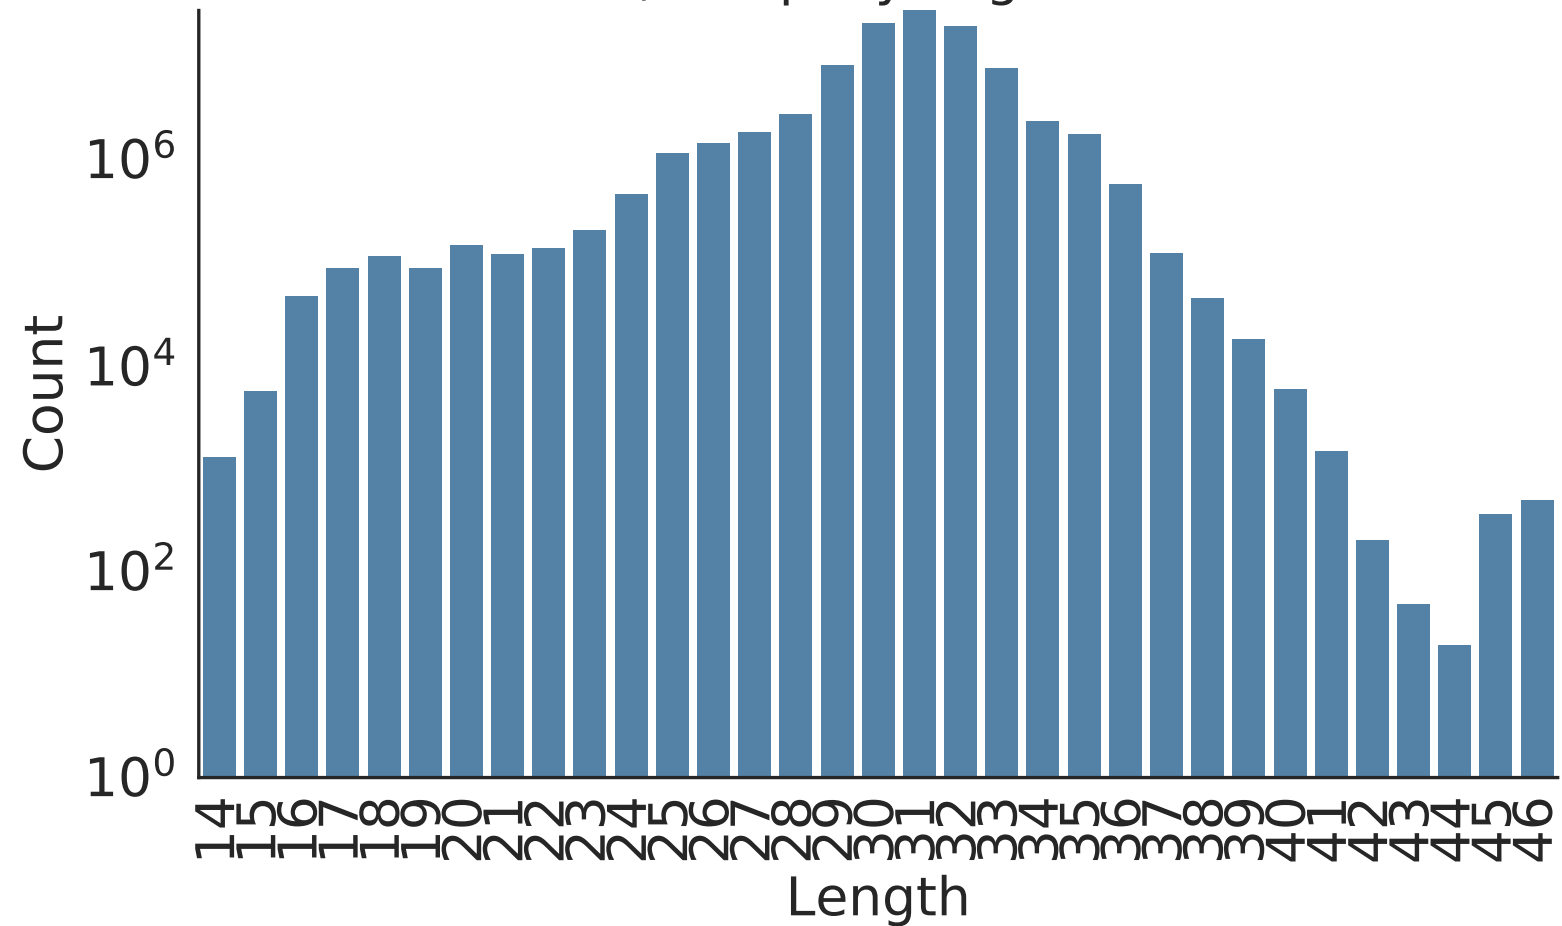

# CTRL, Uniquely aligned reads

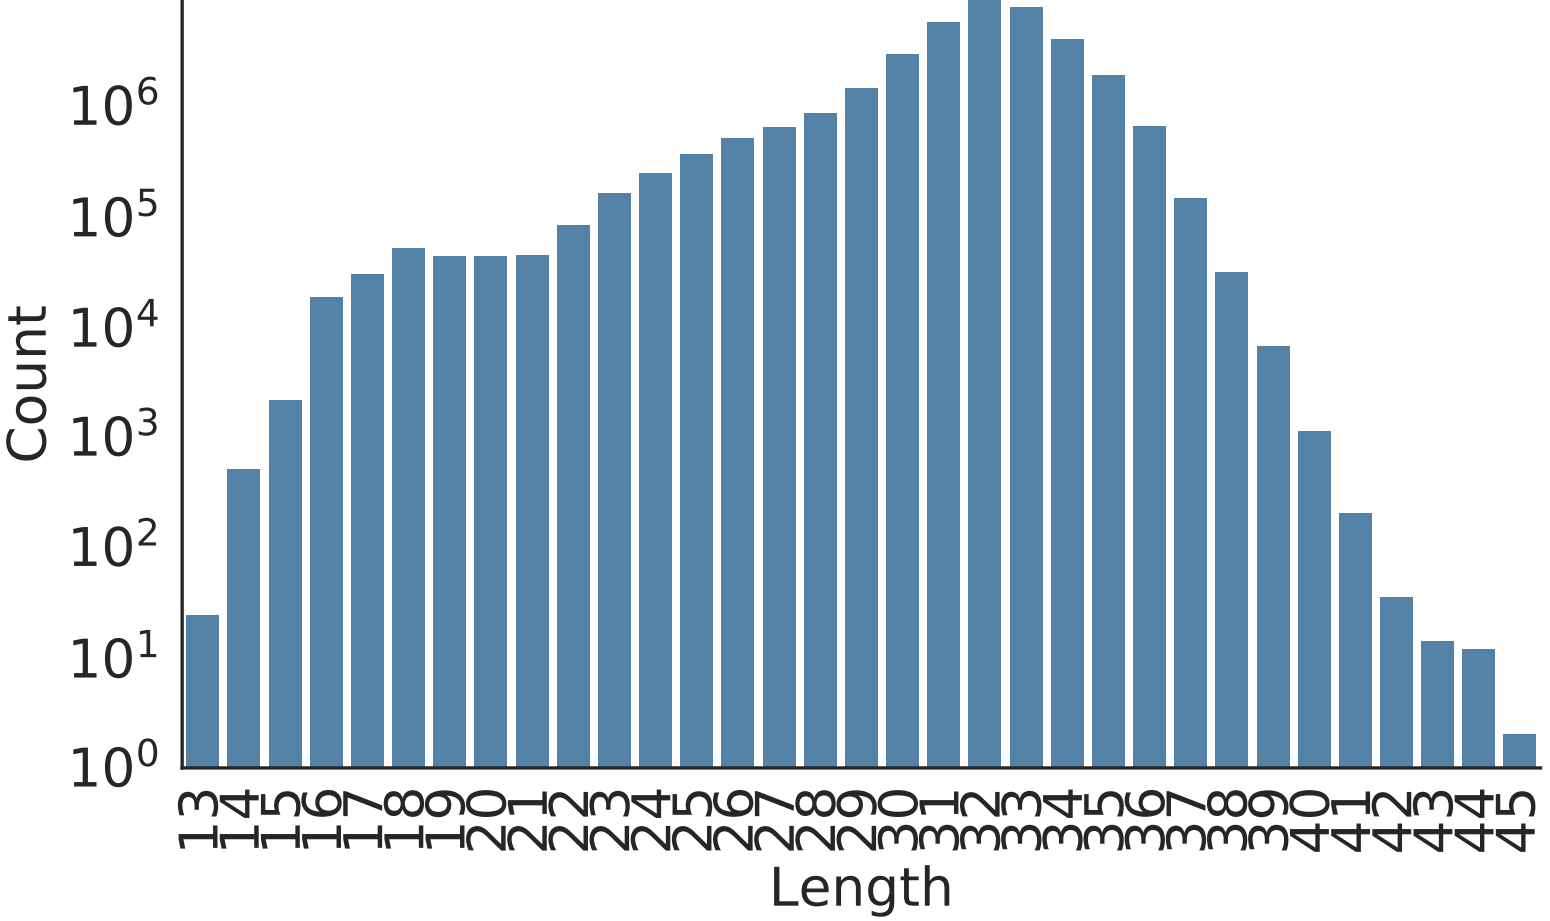

sham-tac-542. length: 29

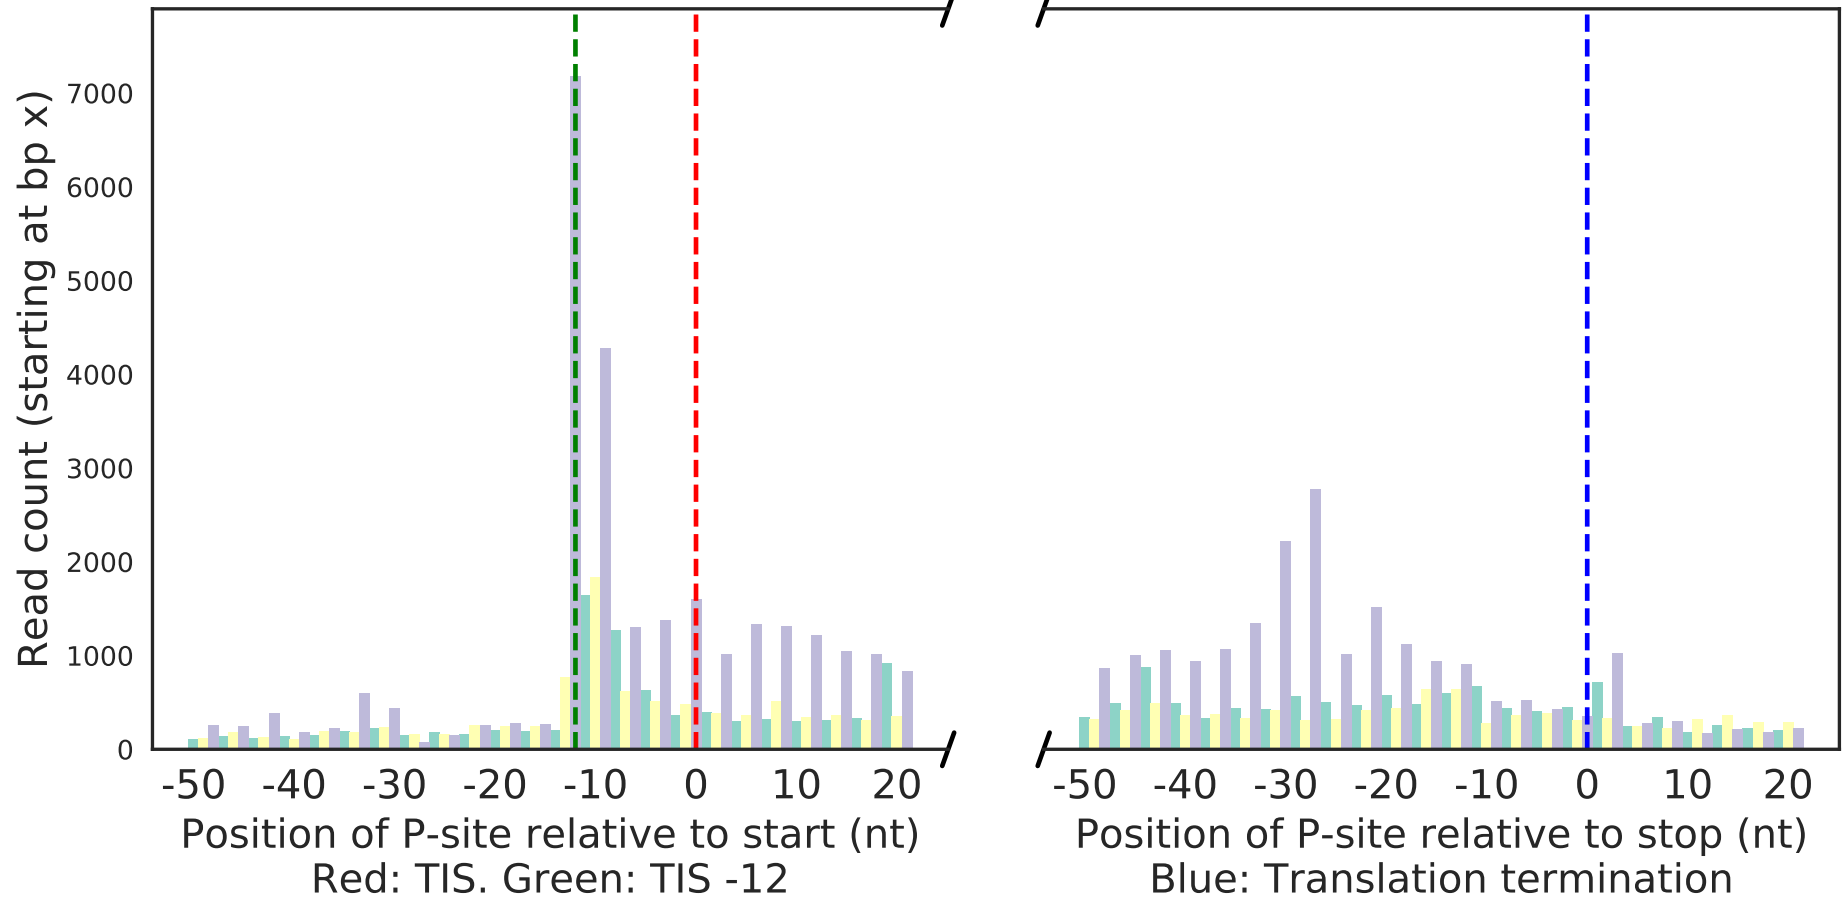

sham-tac-542. length: 30

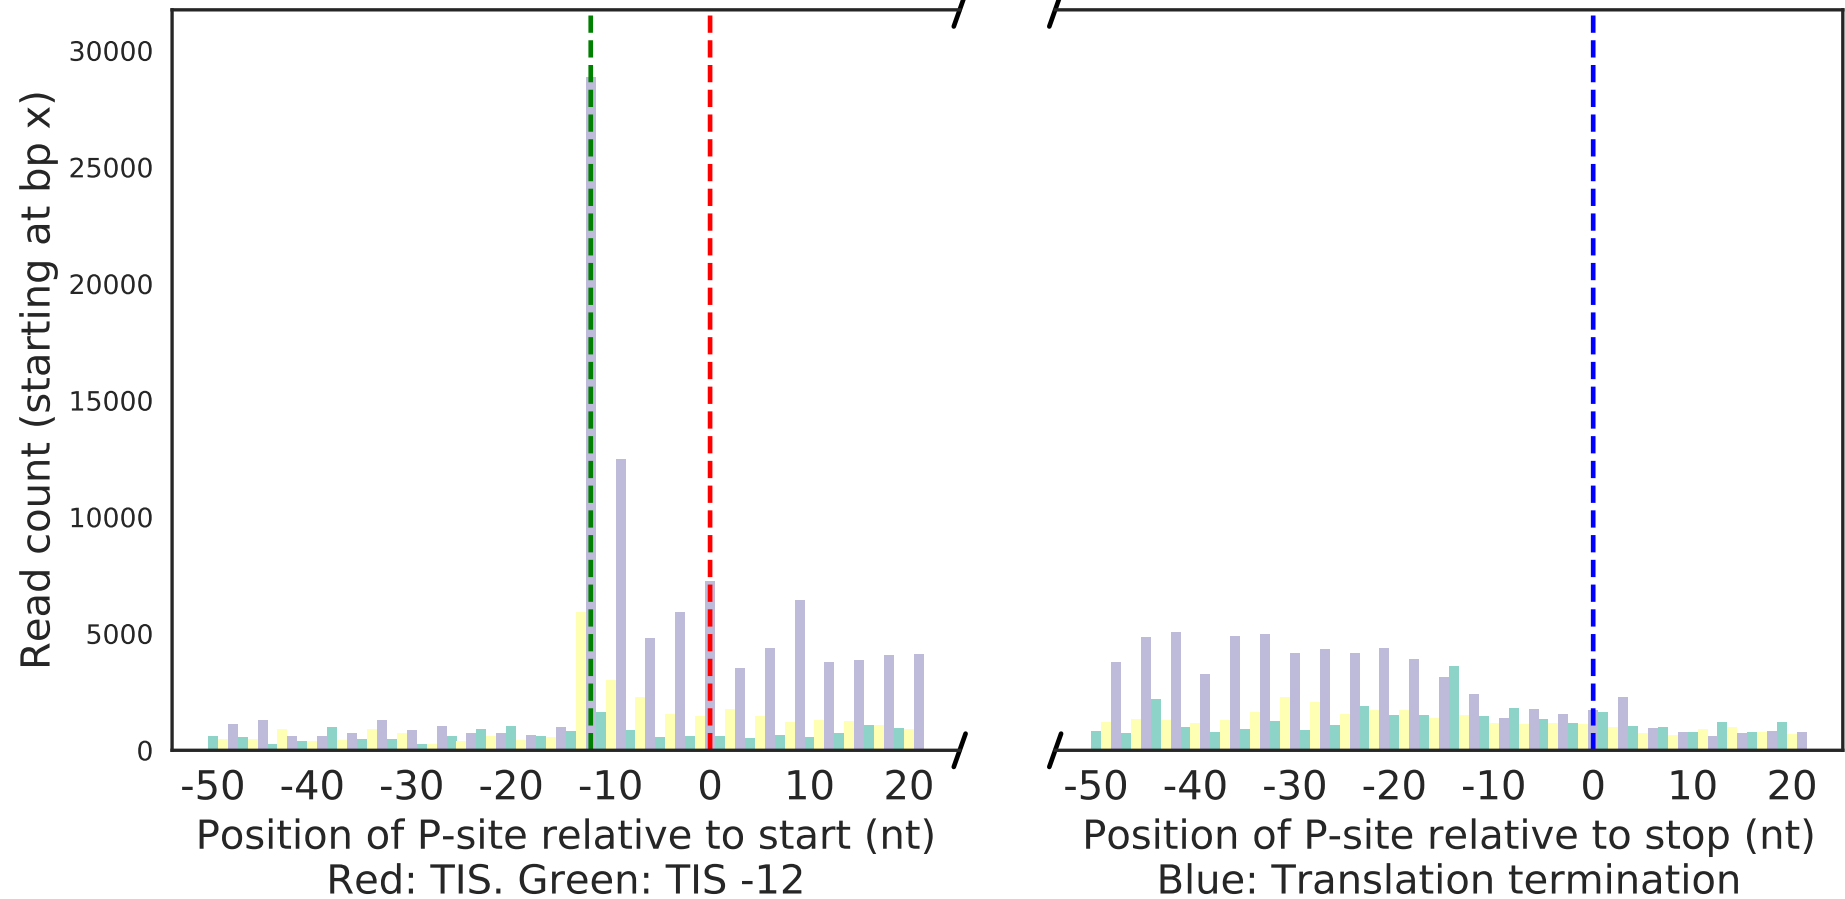



sham-tac-542. length: 33

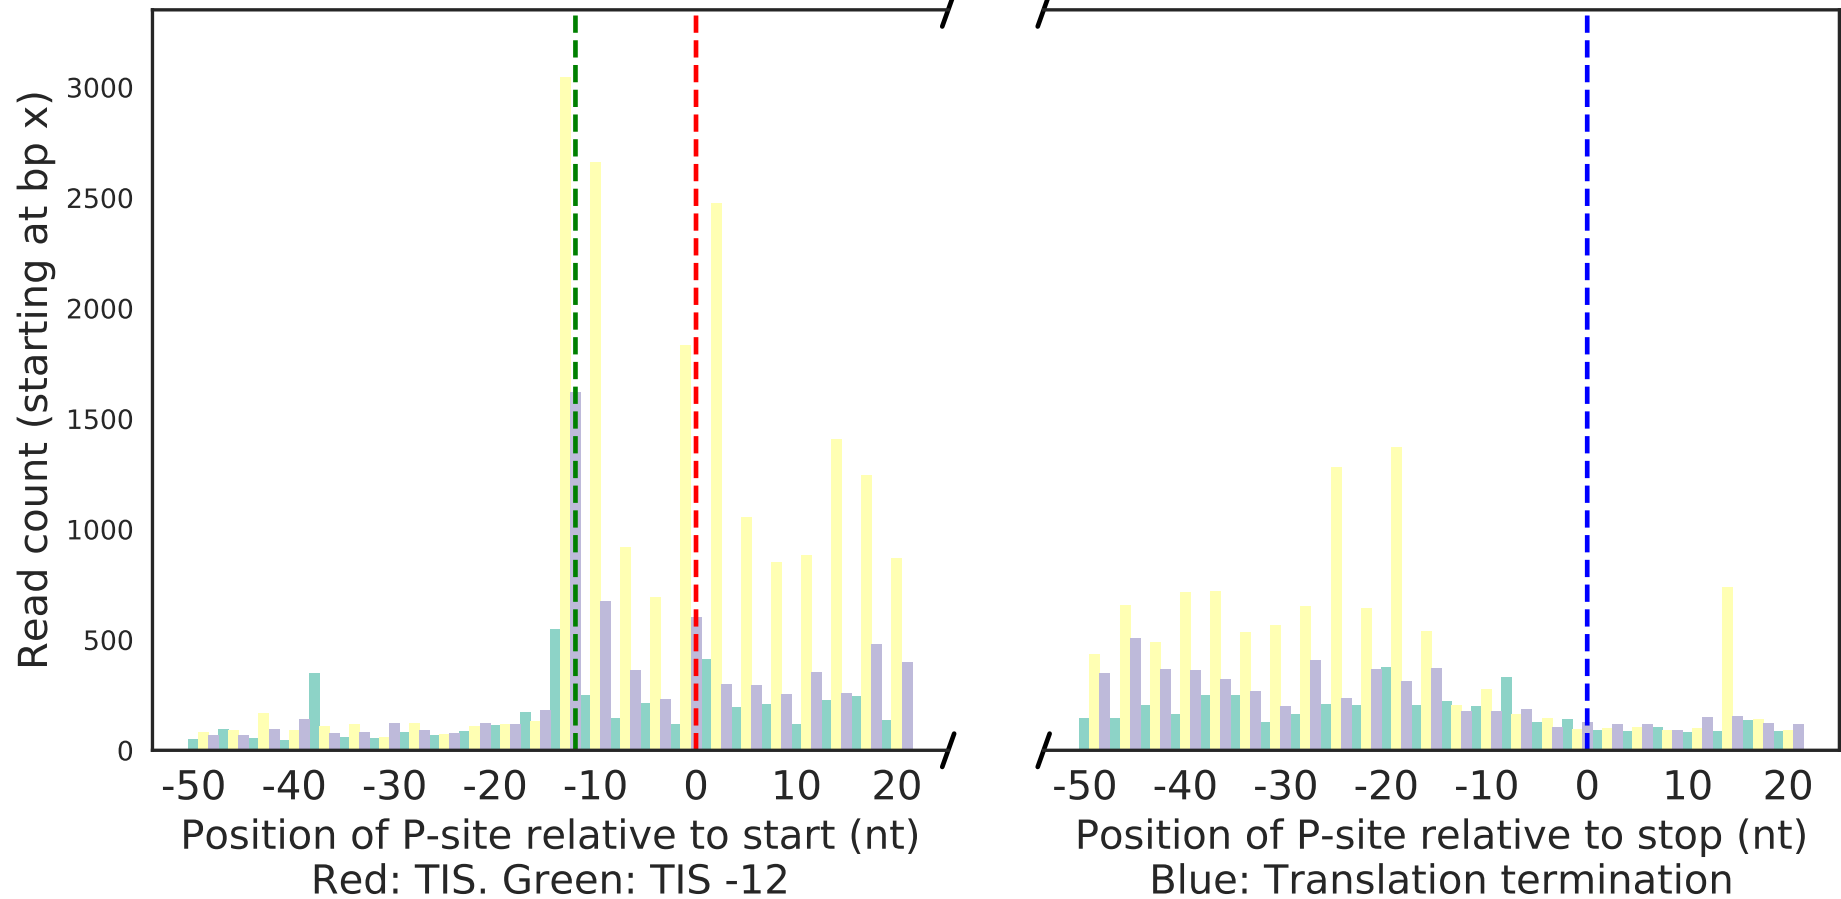

sham-tac-542. length: 34

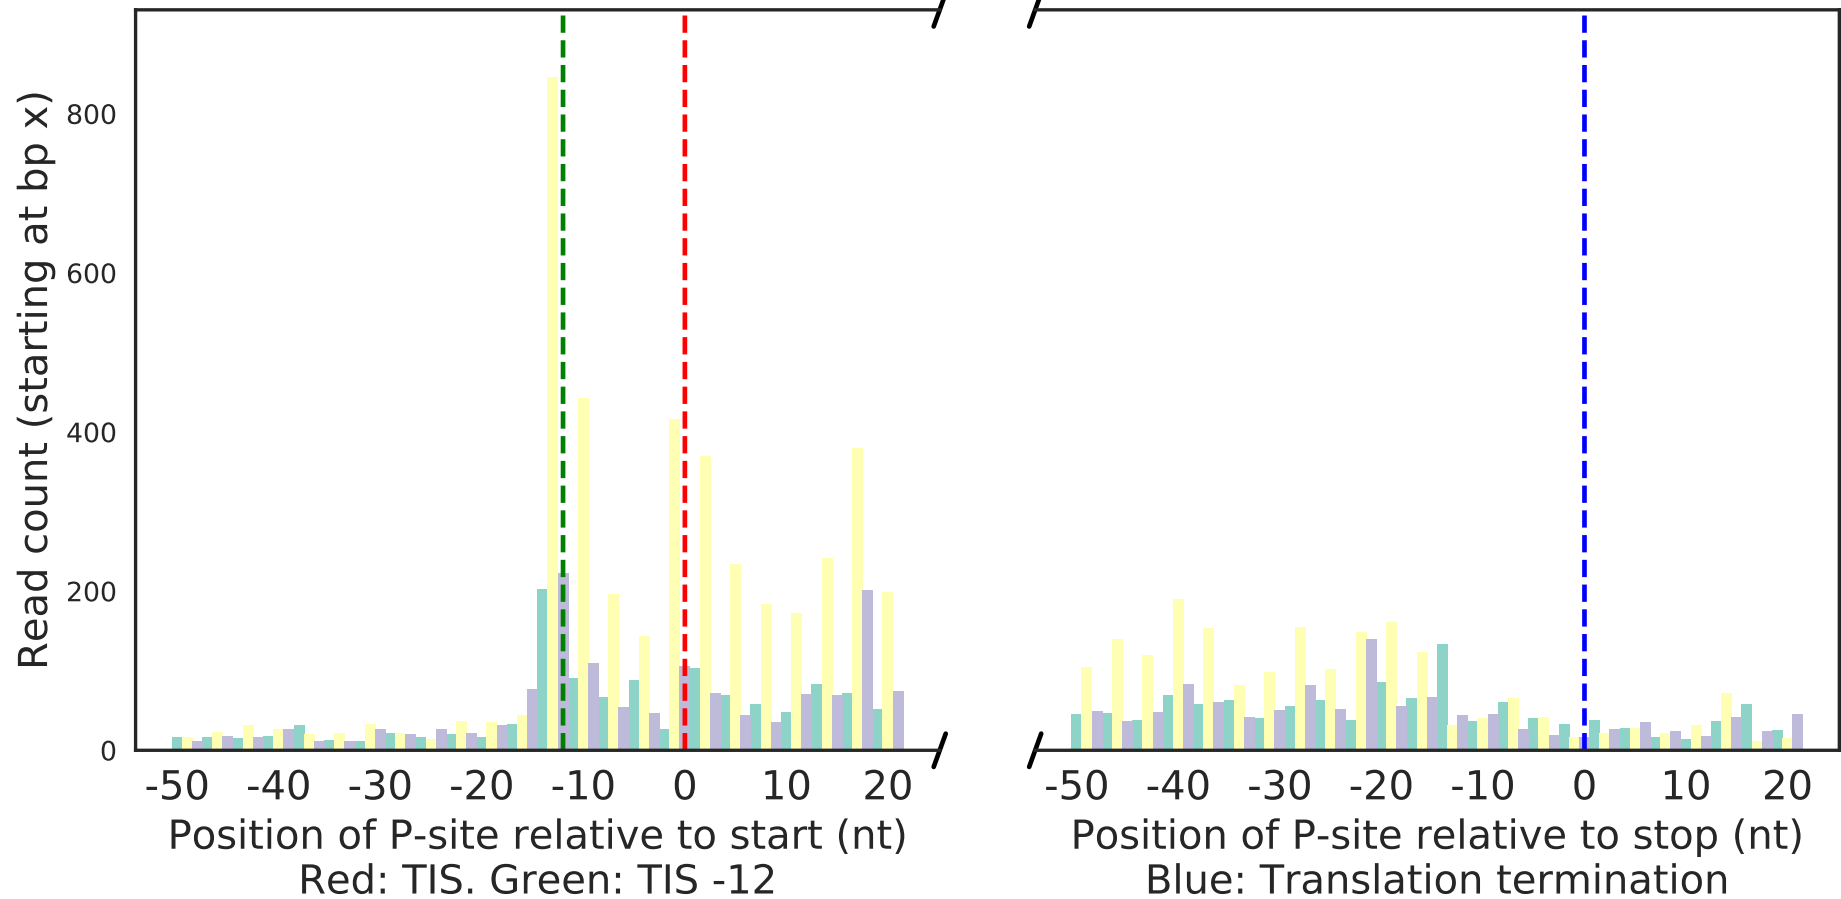

sham-tac-574. length: 29

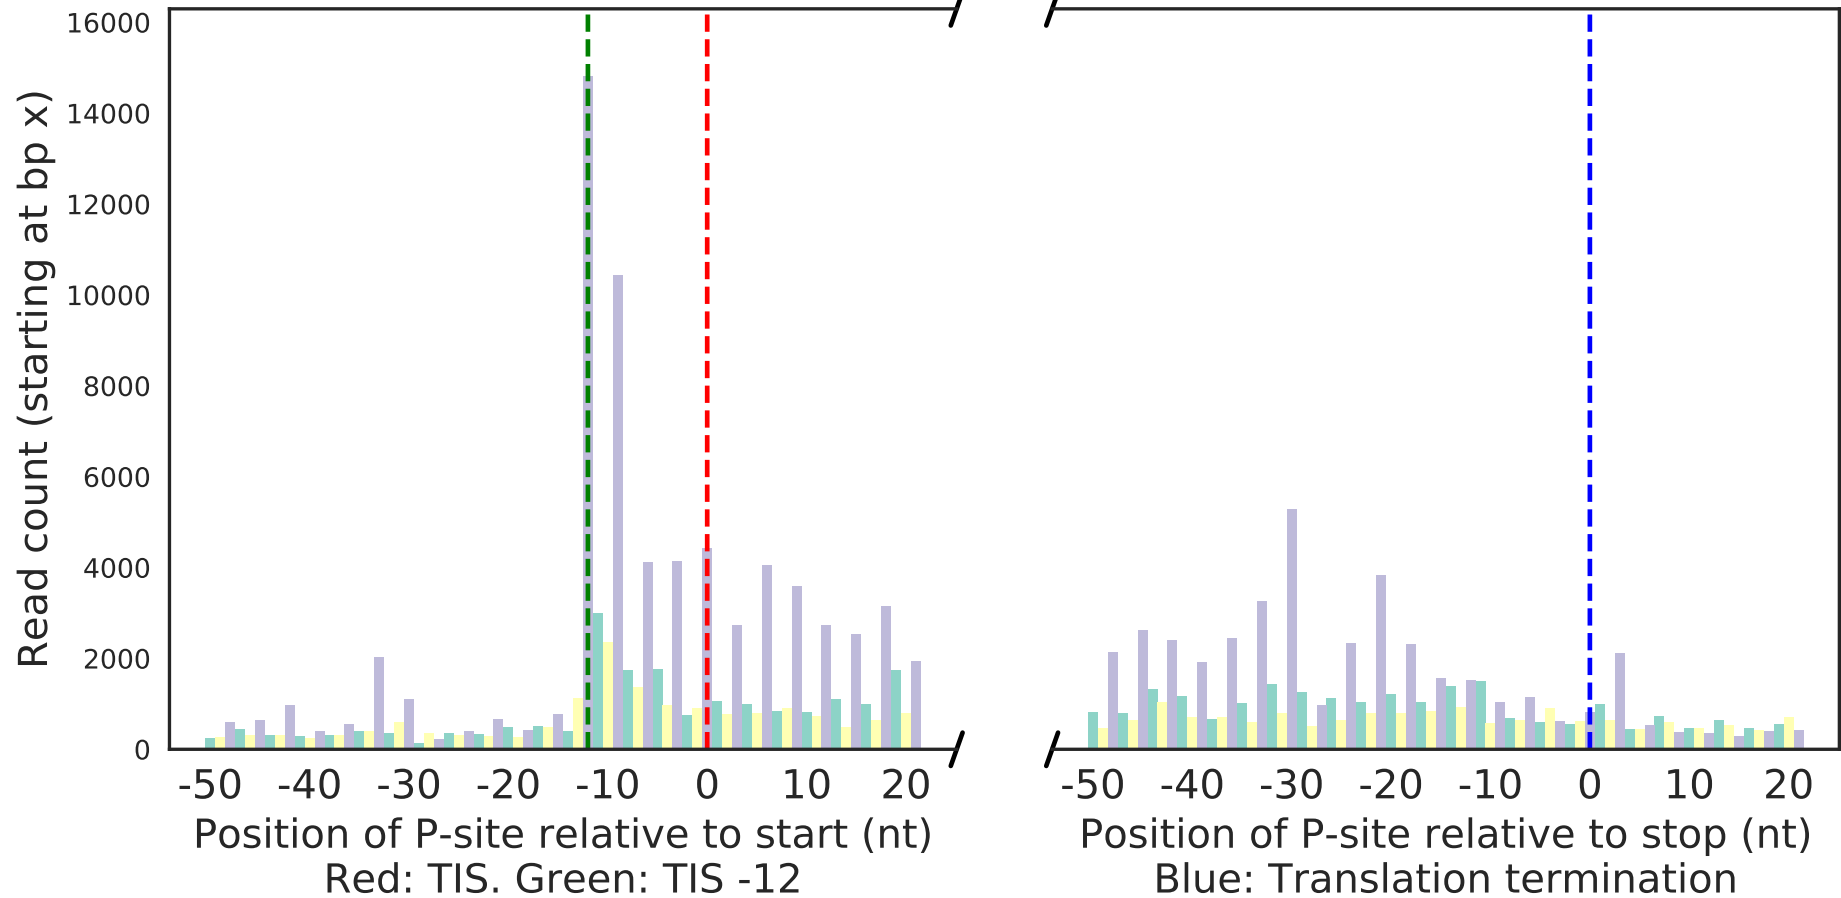

sham-tac-574. length: 30

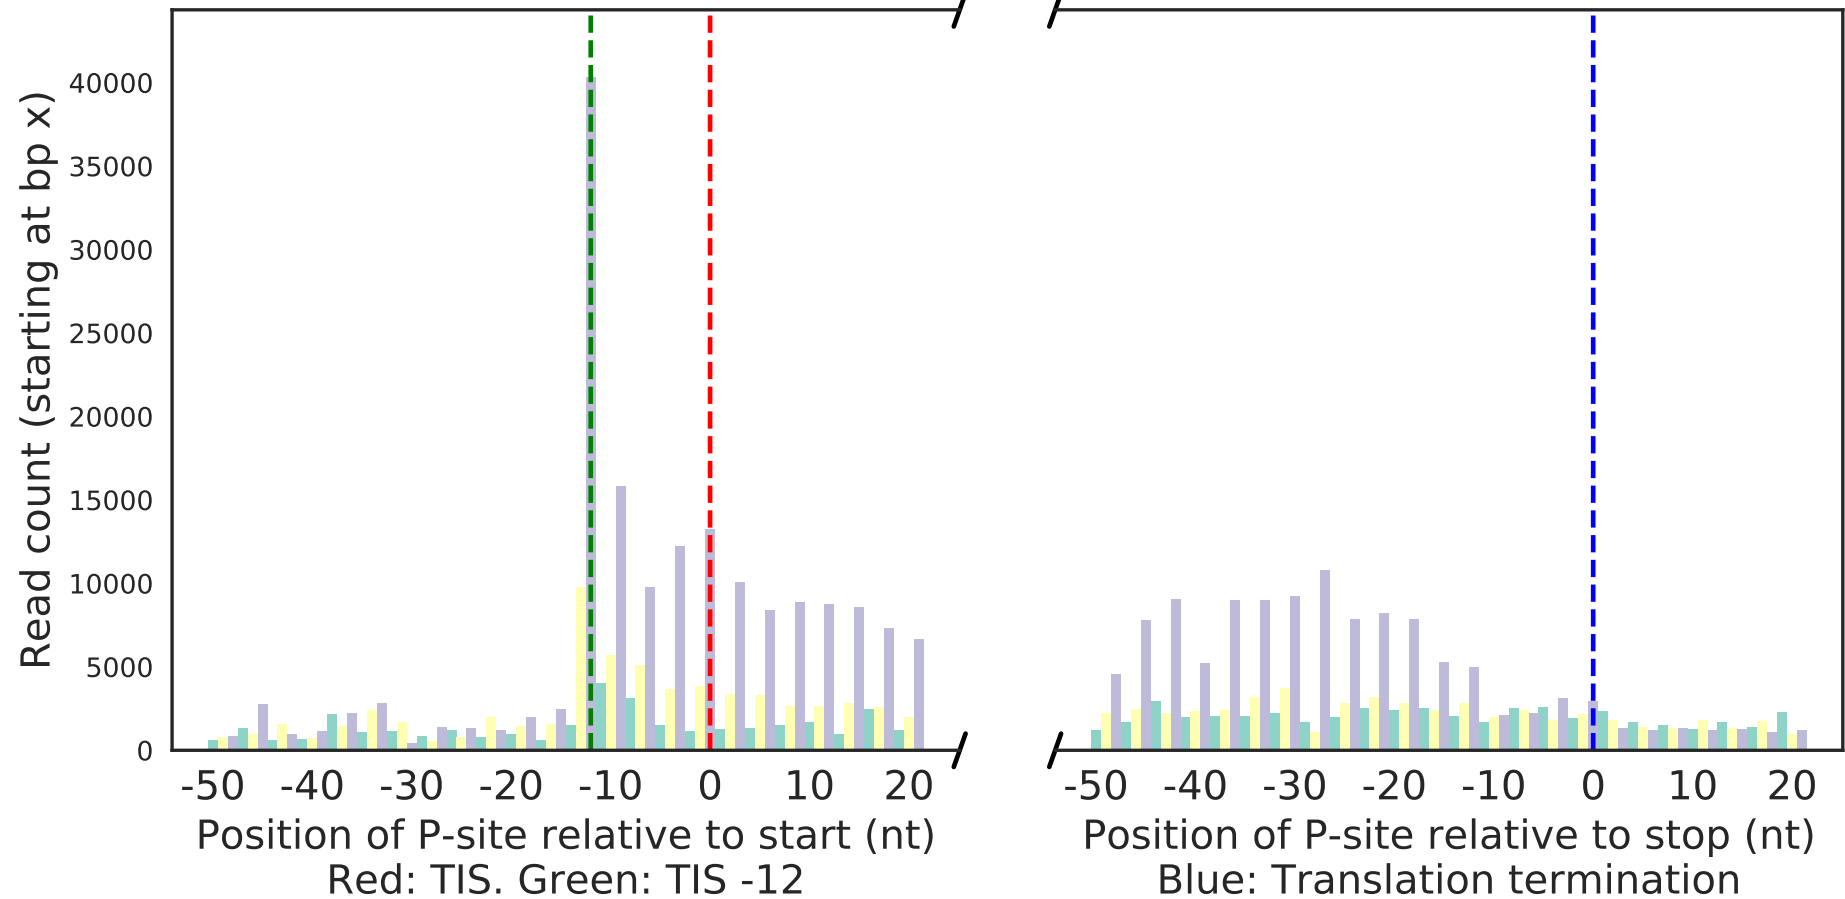

sham-tac-574. length: 33

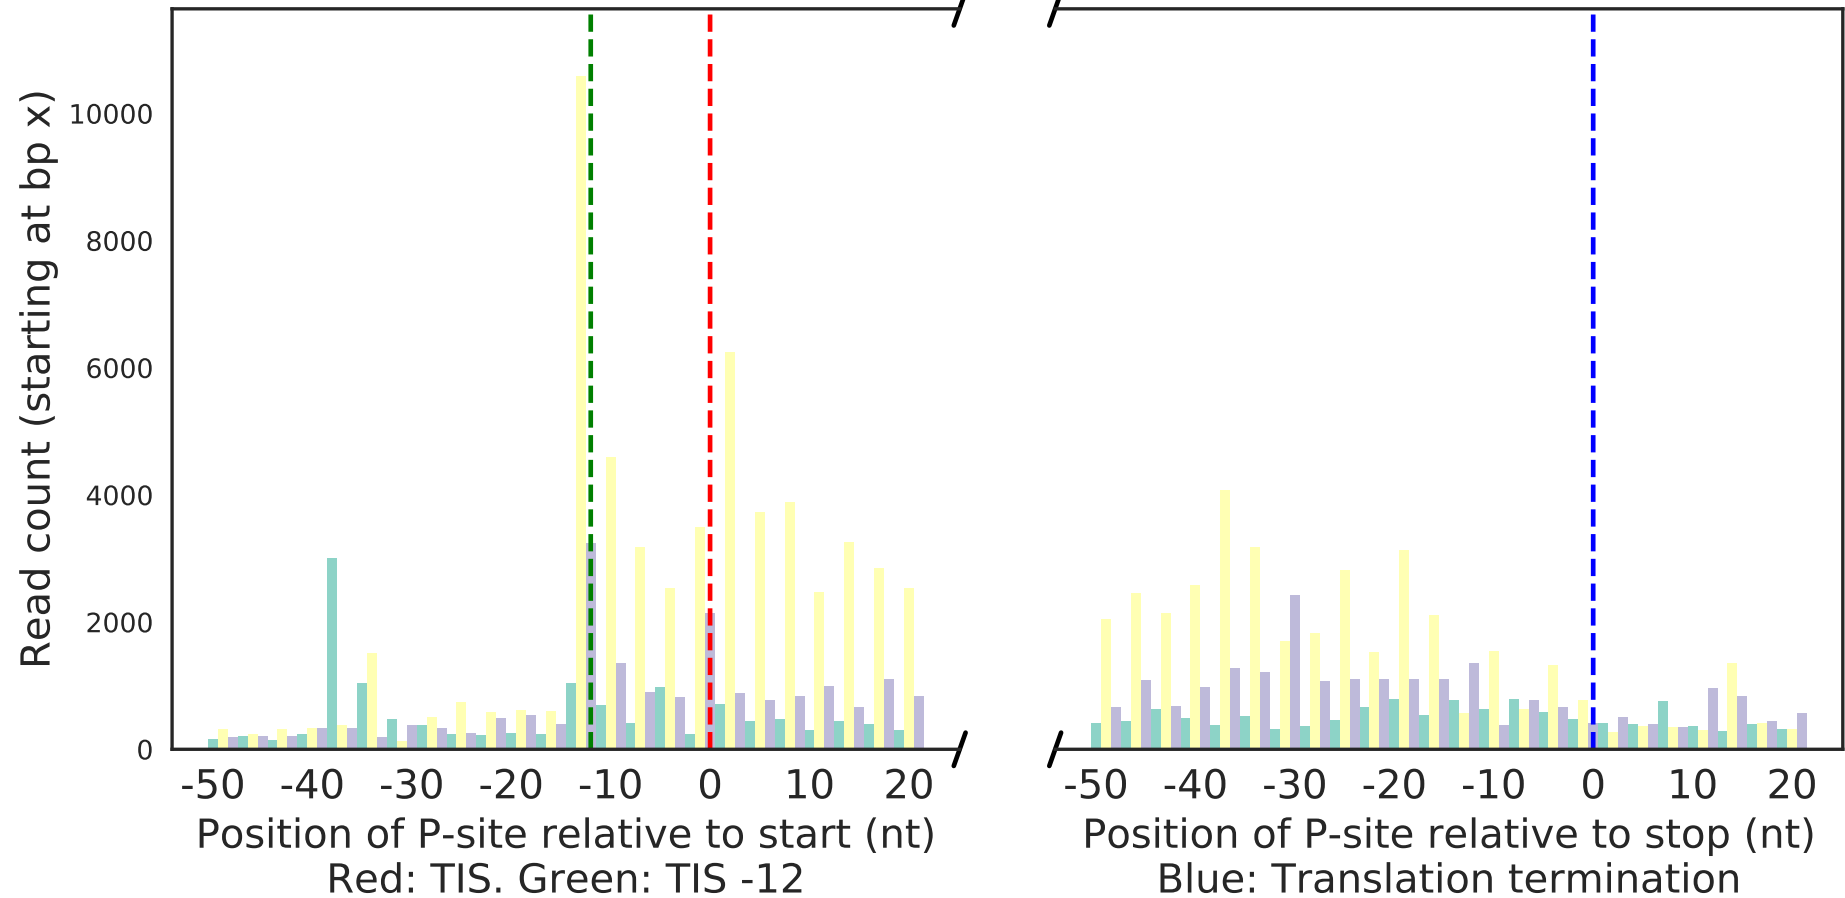

sham-tac-574. length: 34

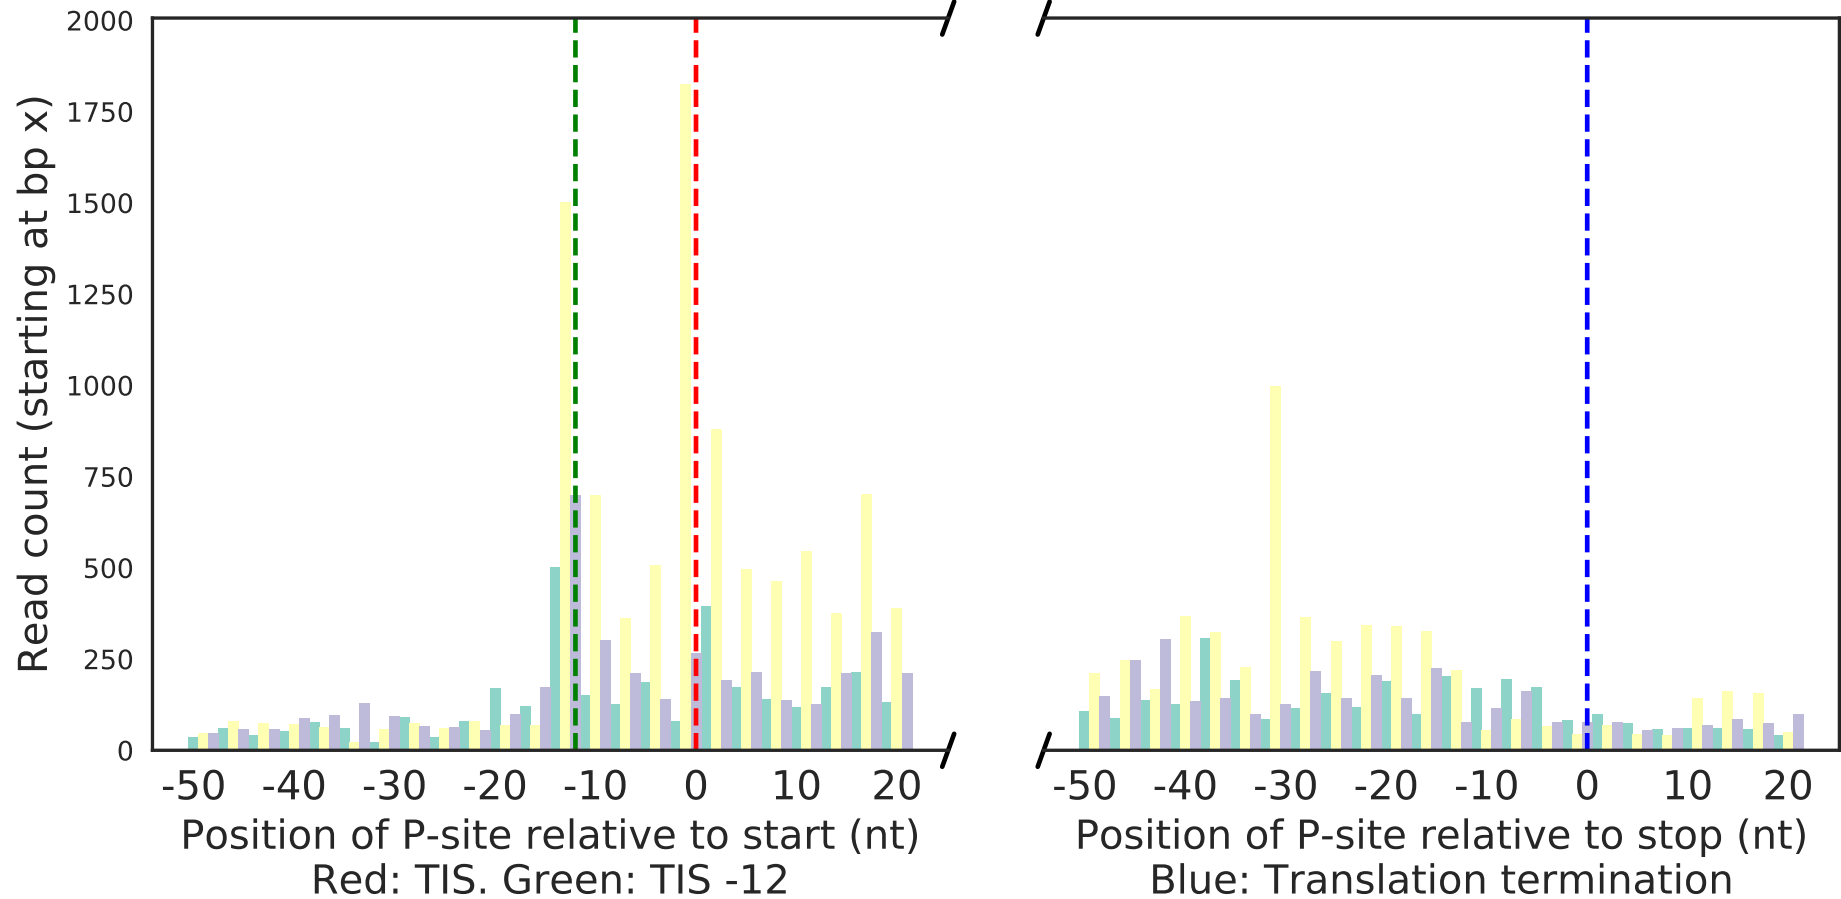

sham-tac-574. length: 35

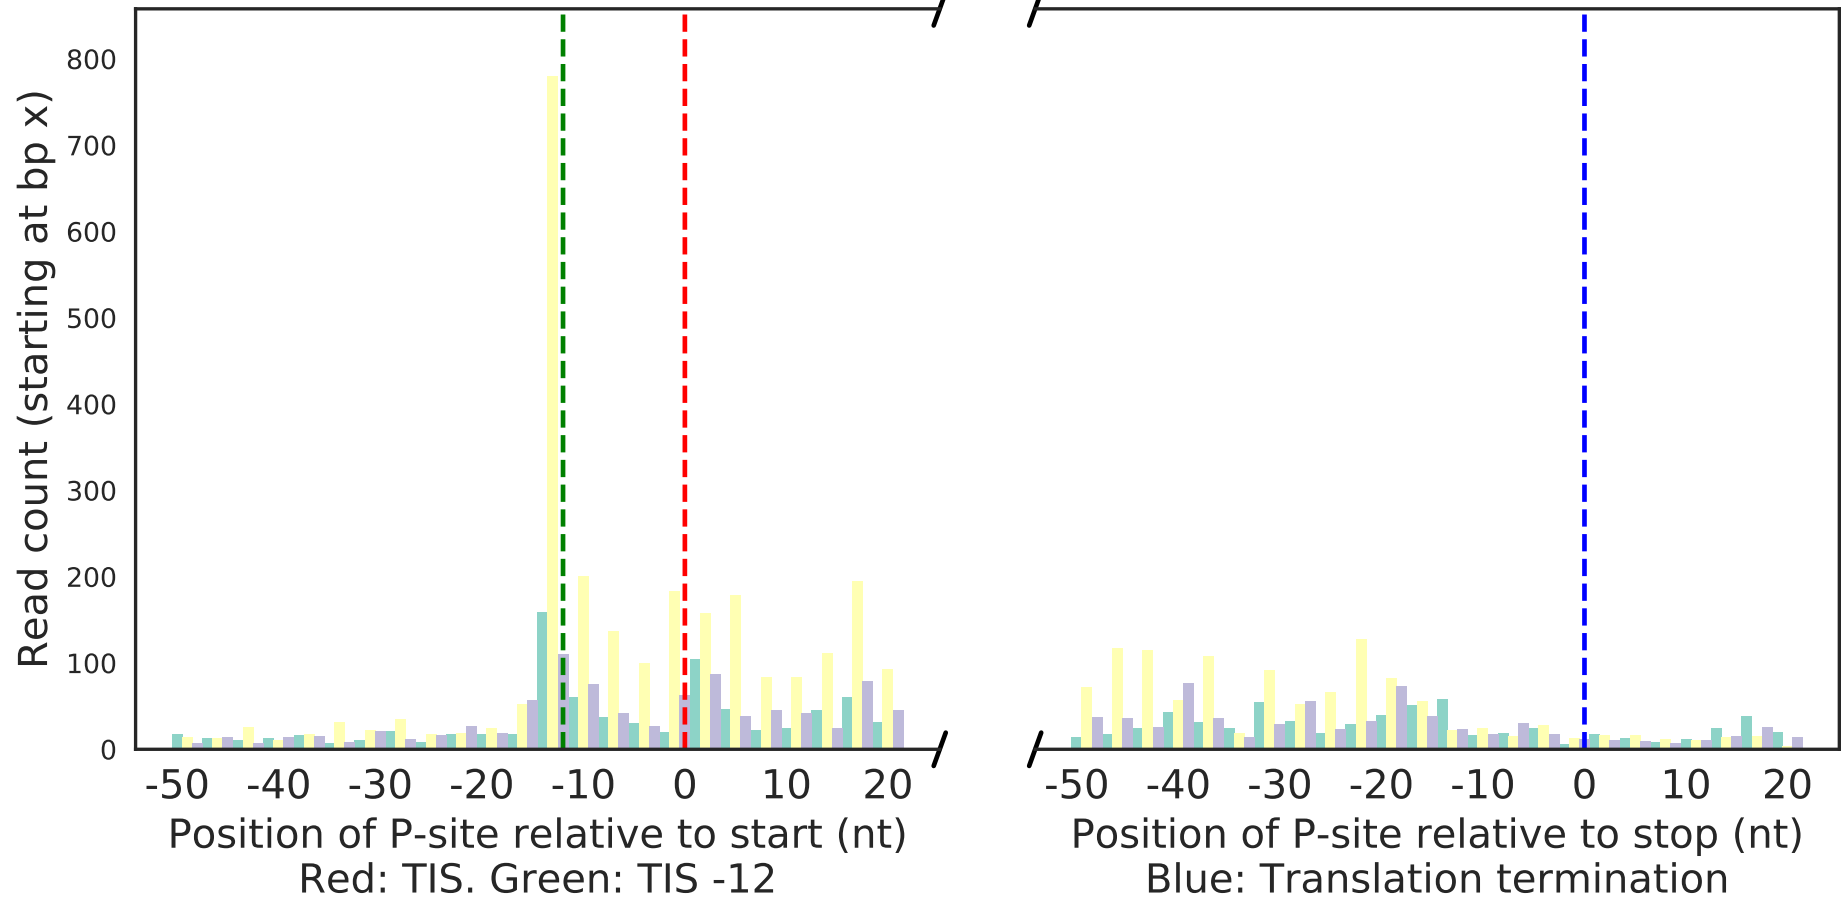

sham-tac-716. length: 29

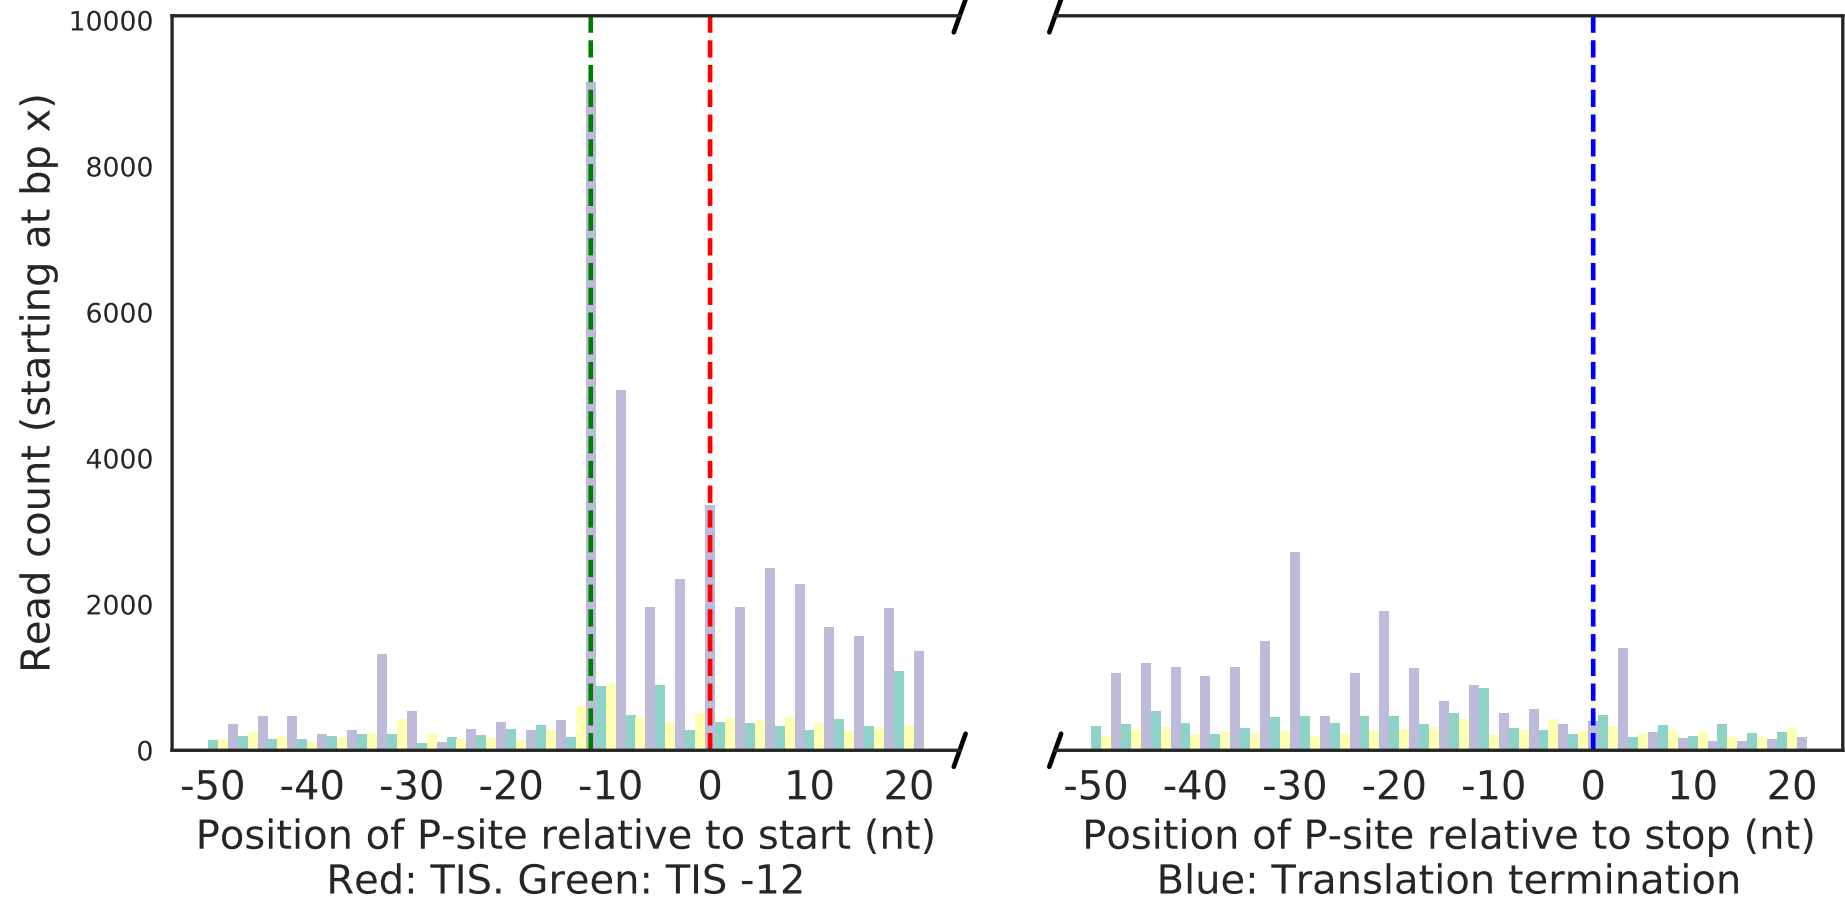



sham-tac-716. length: 30

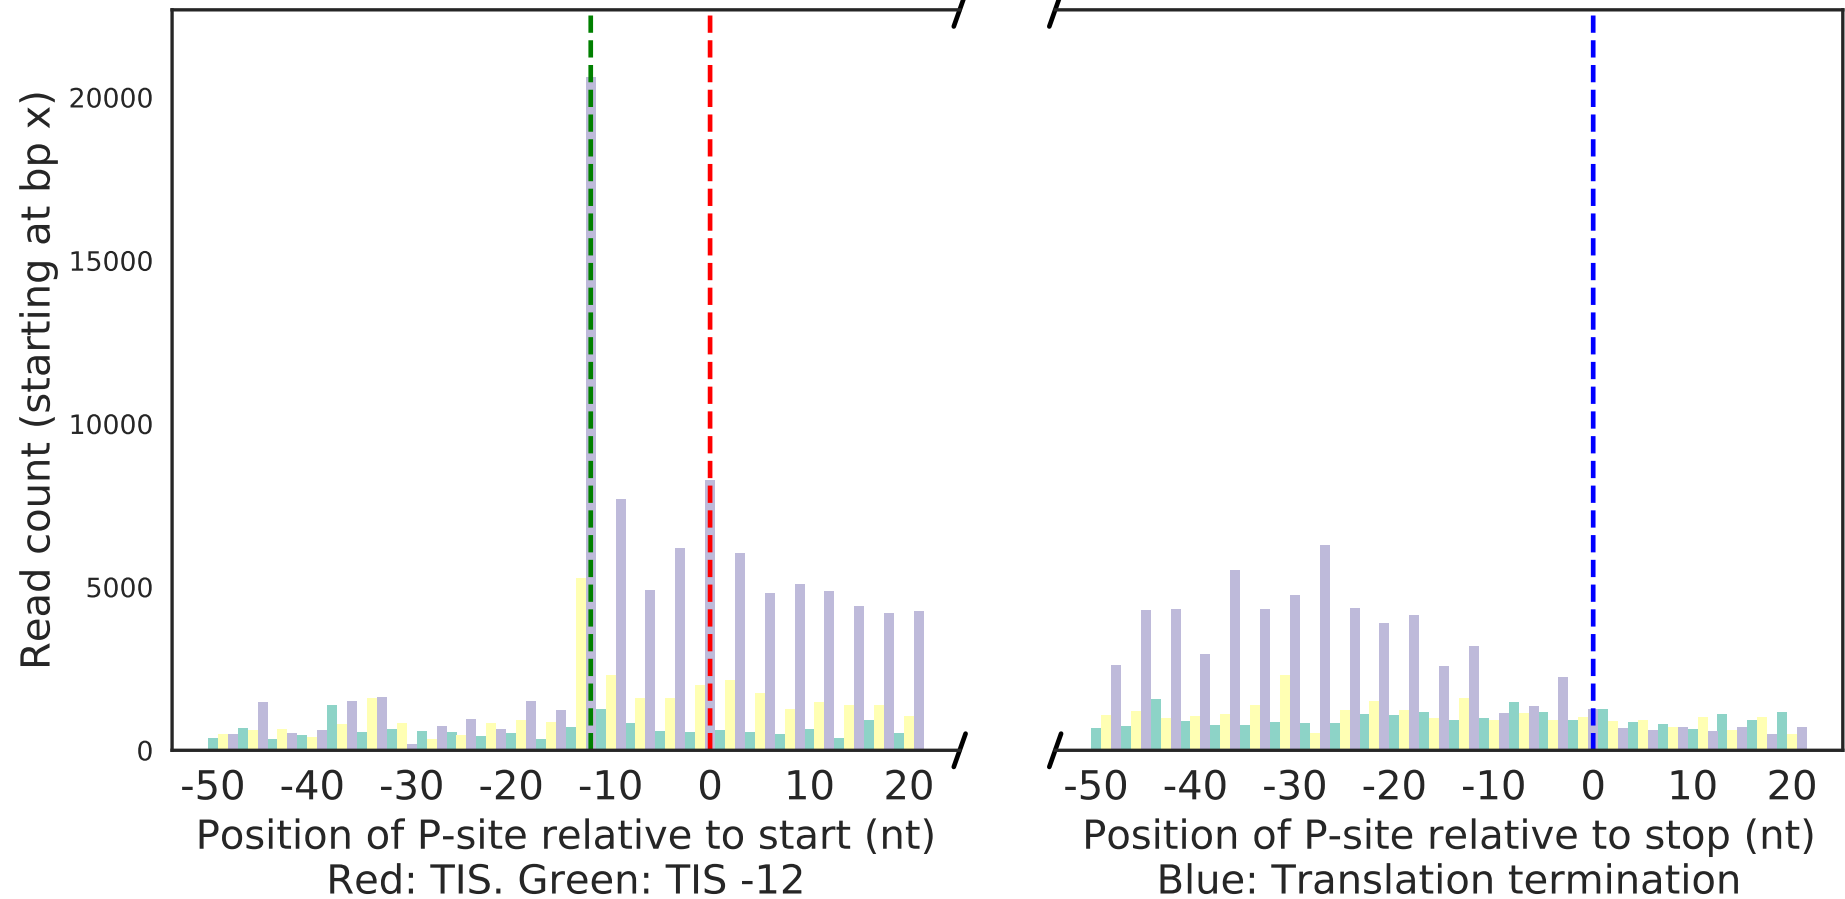

sham-tac-716. length: 33

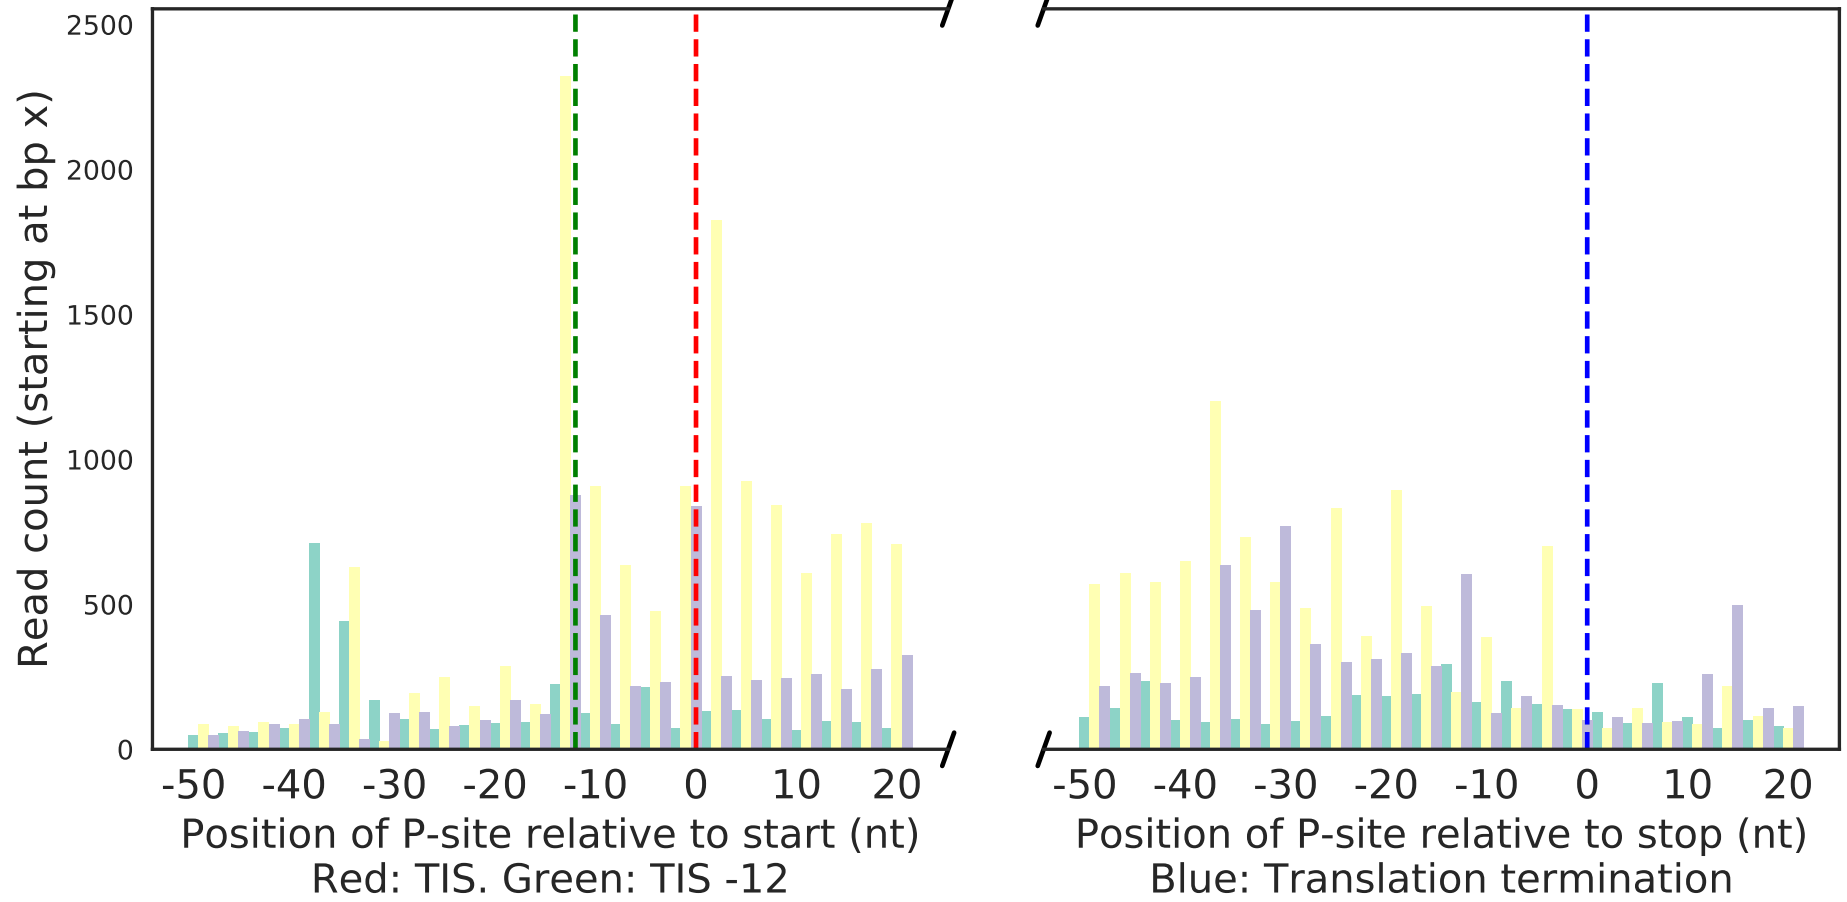

sham-tac-716. length: 34

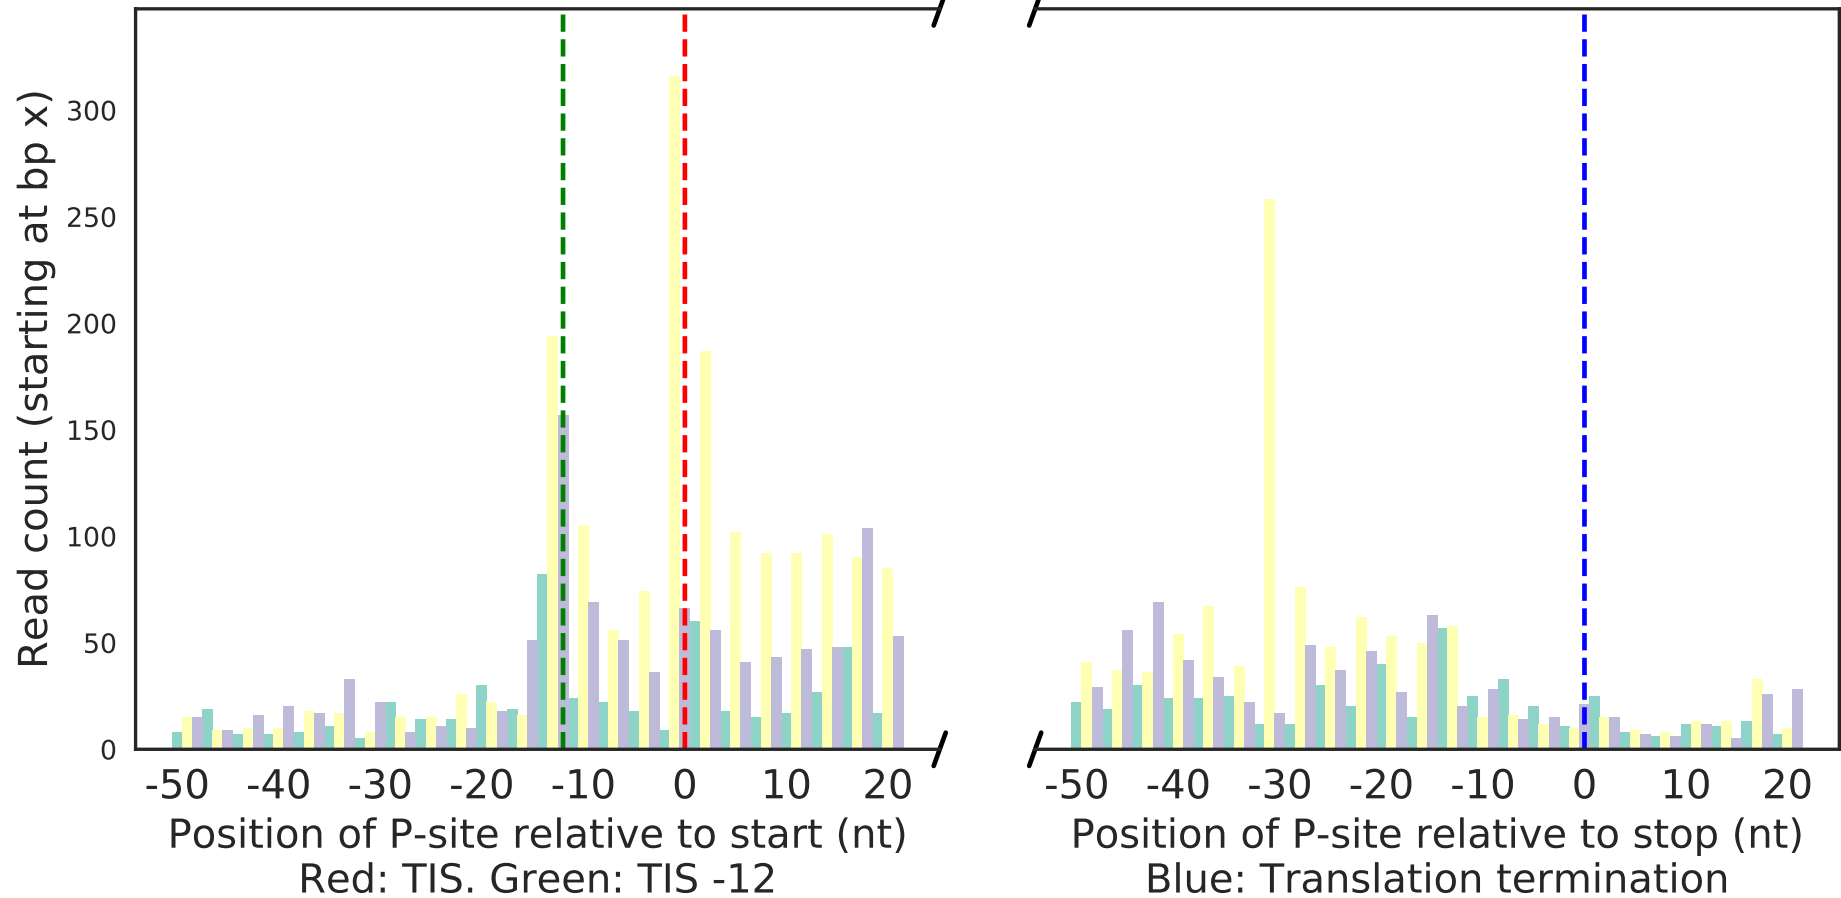

sham-tac-745. length: 30

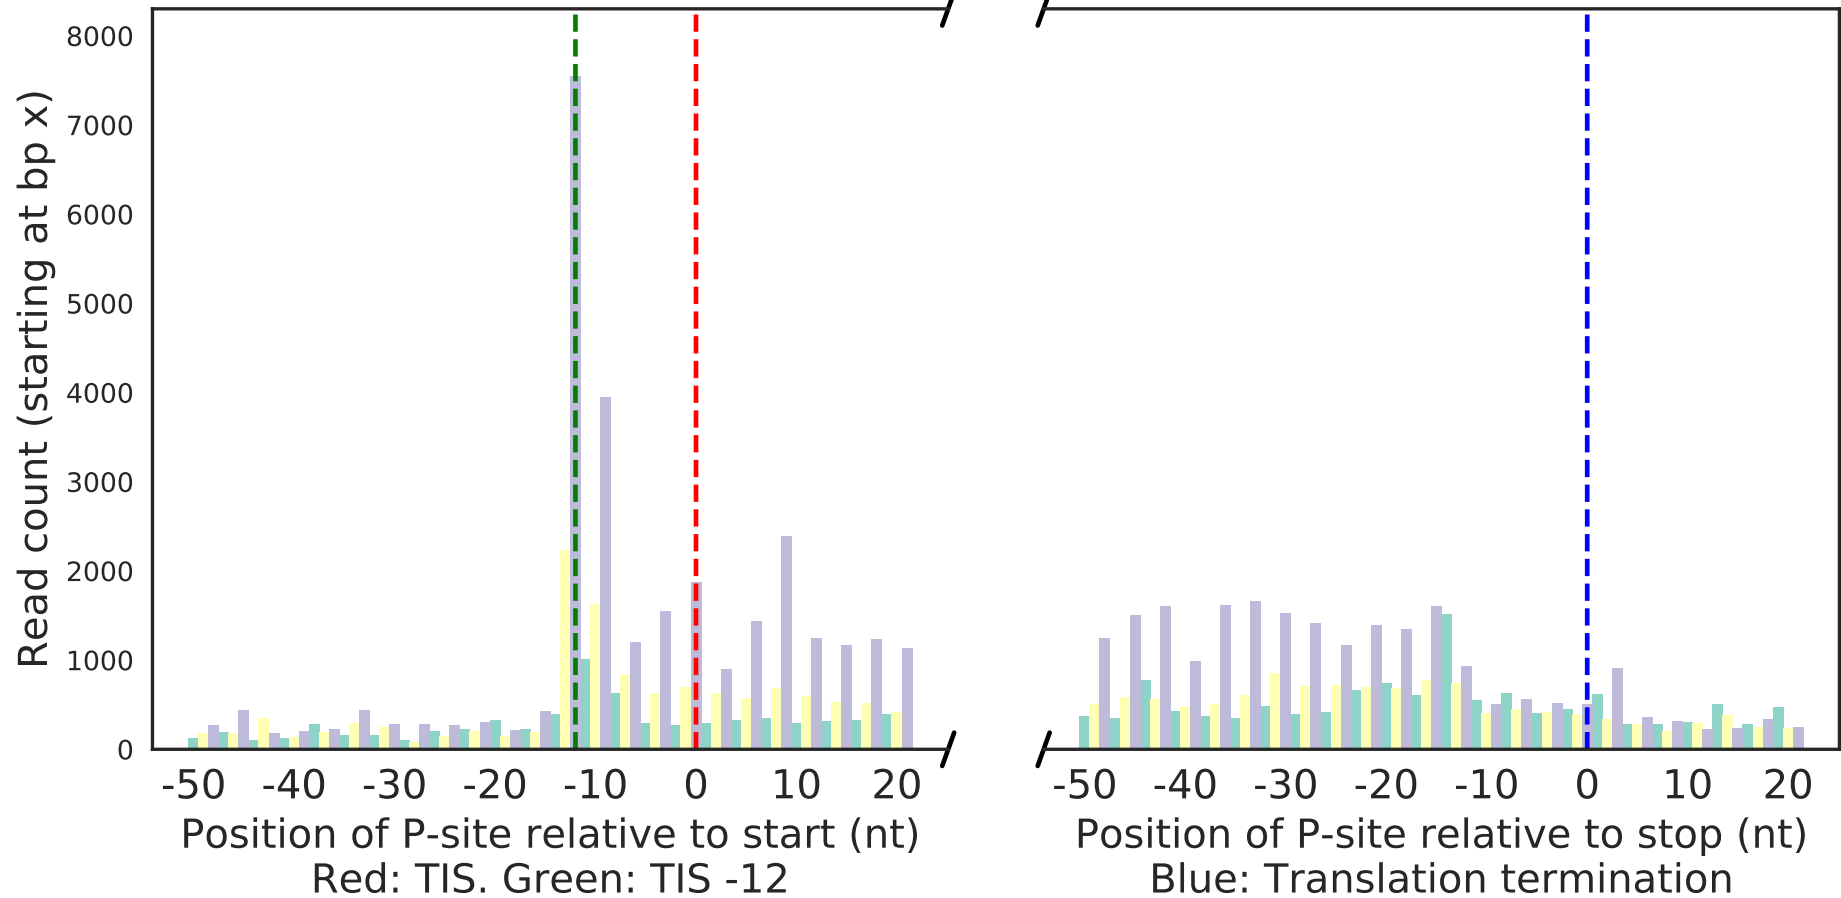

sham-tac-745. length: 32

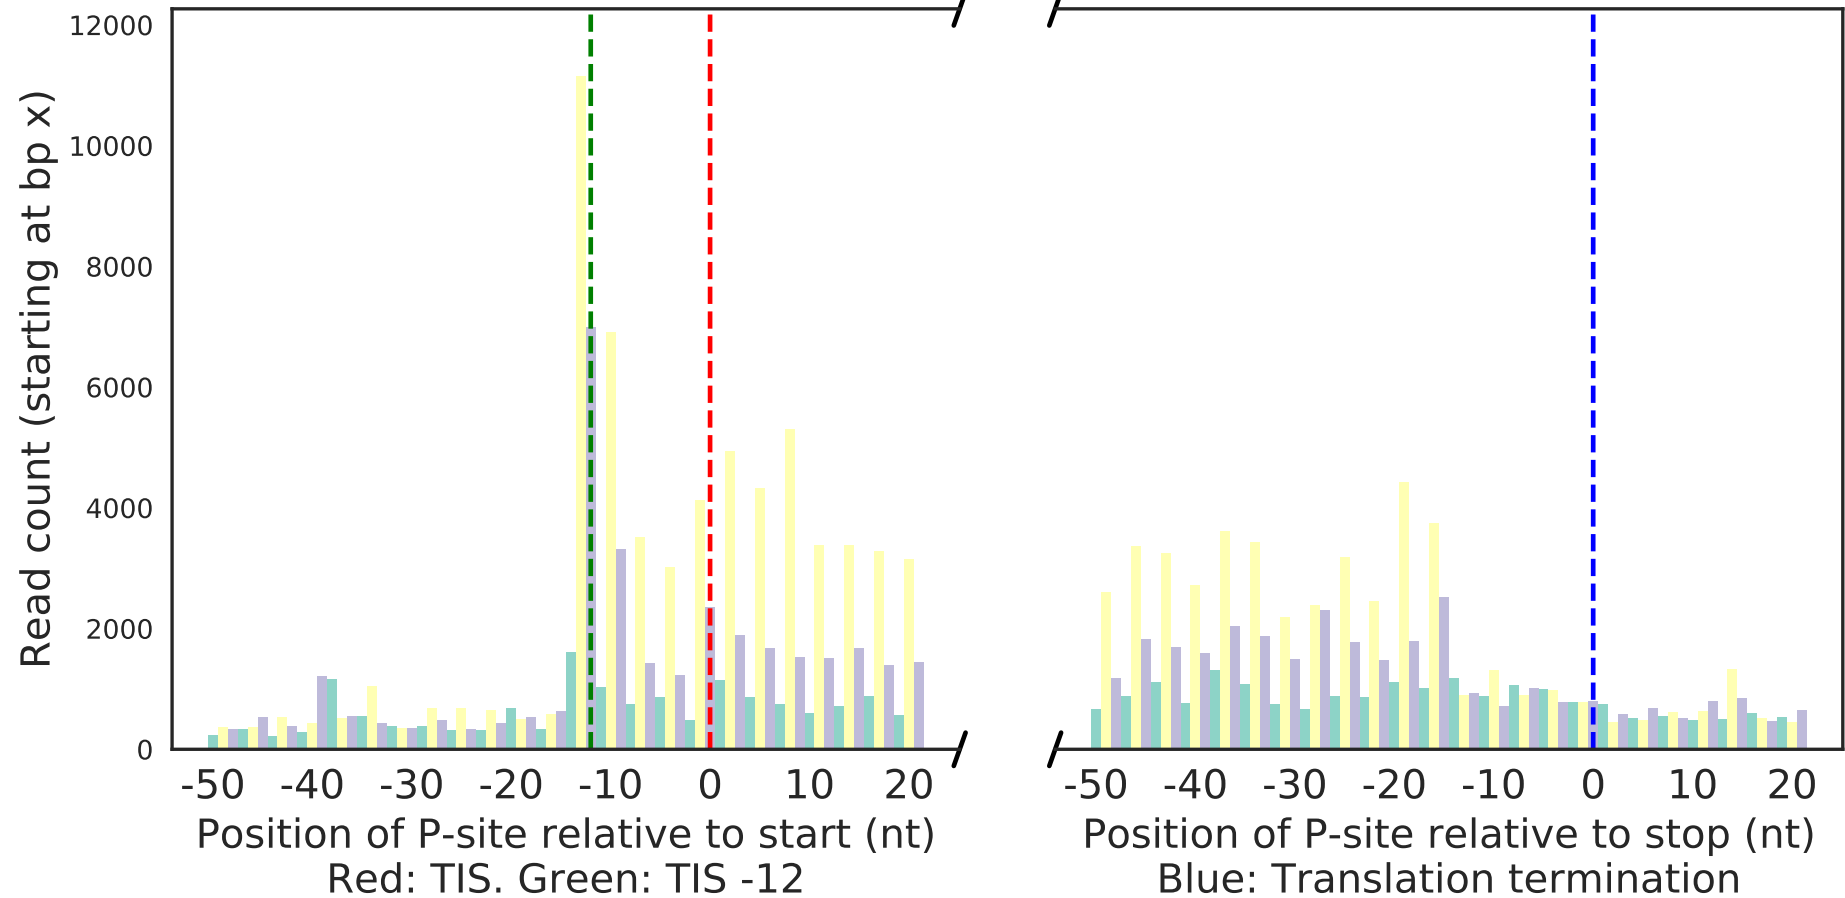

sham-tac-745. length: 33

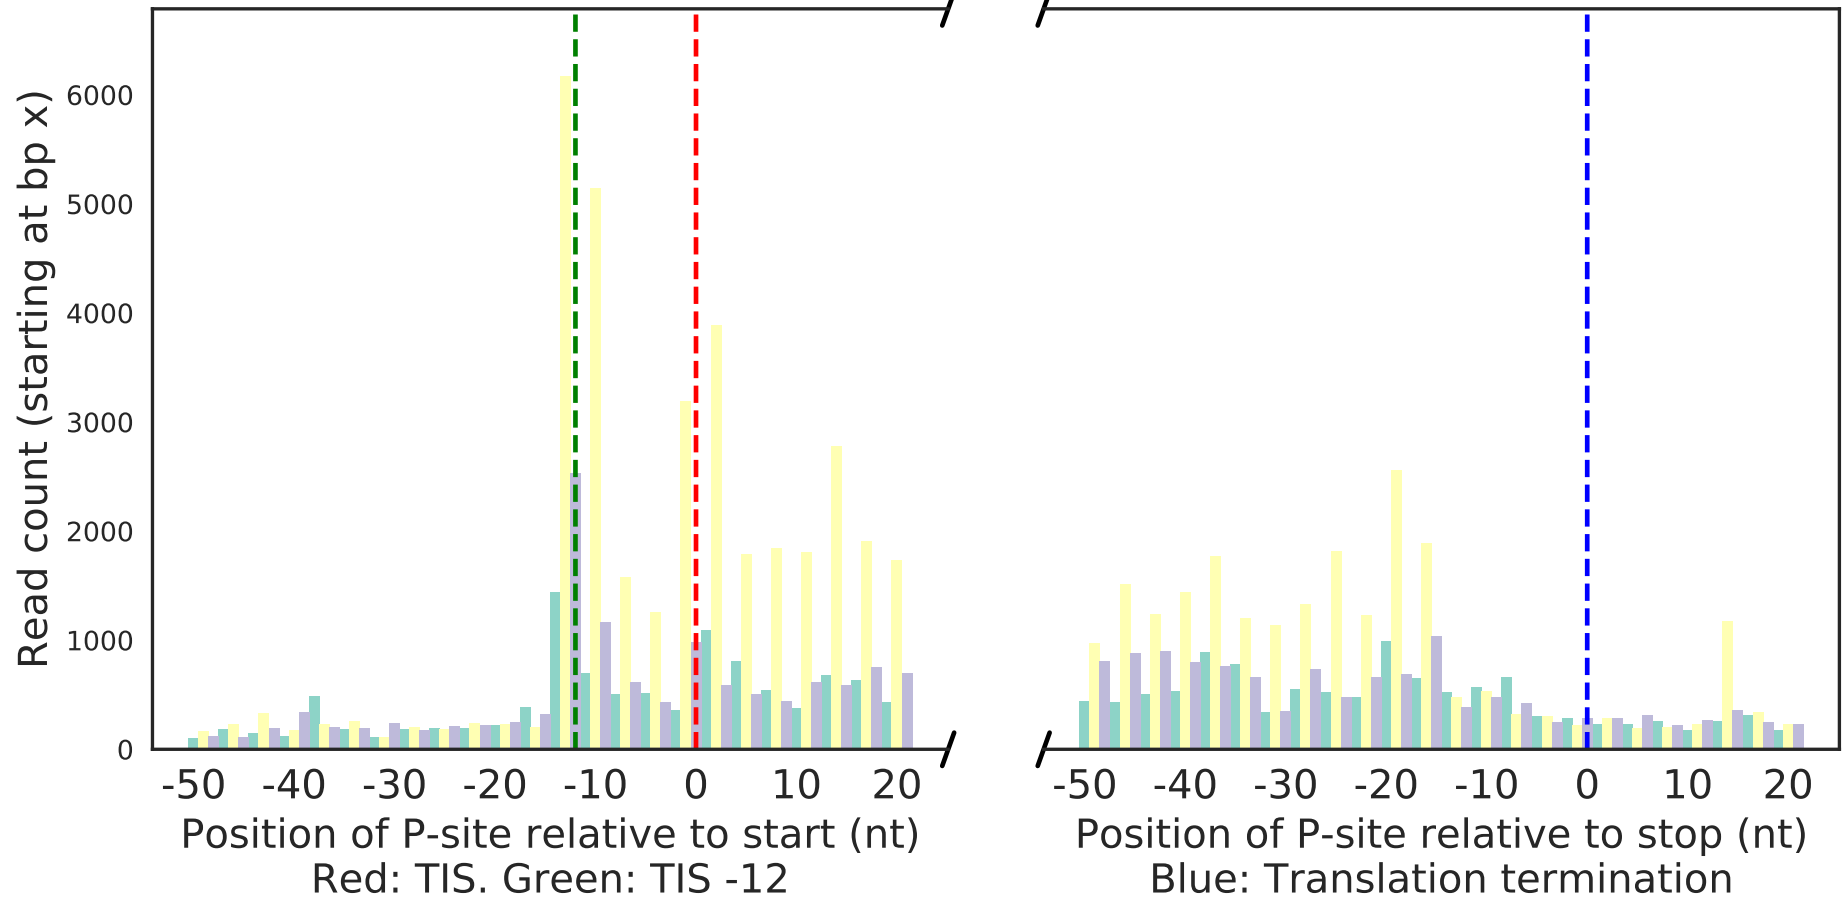

sham-tac-745. length: 34

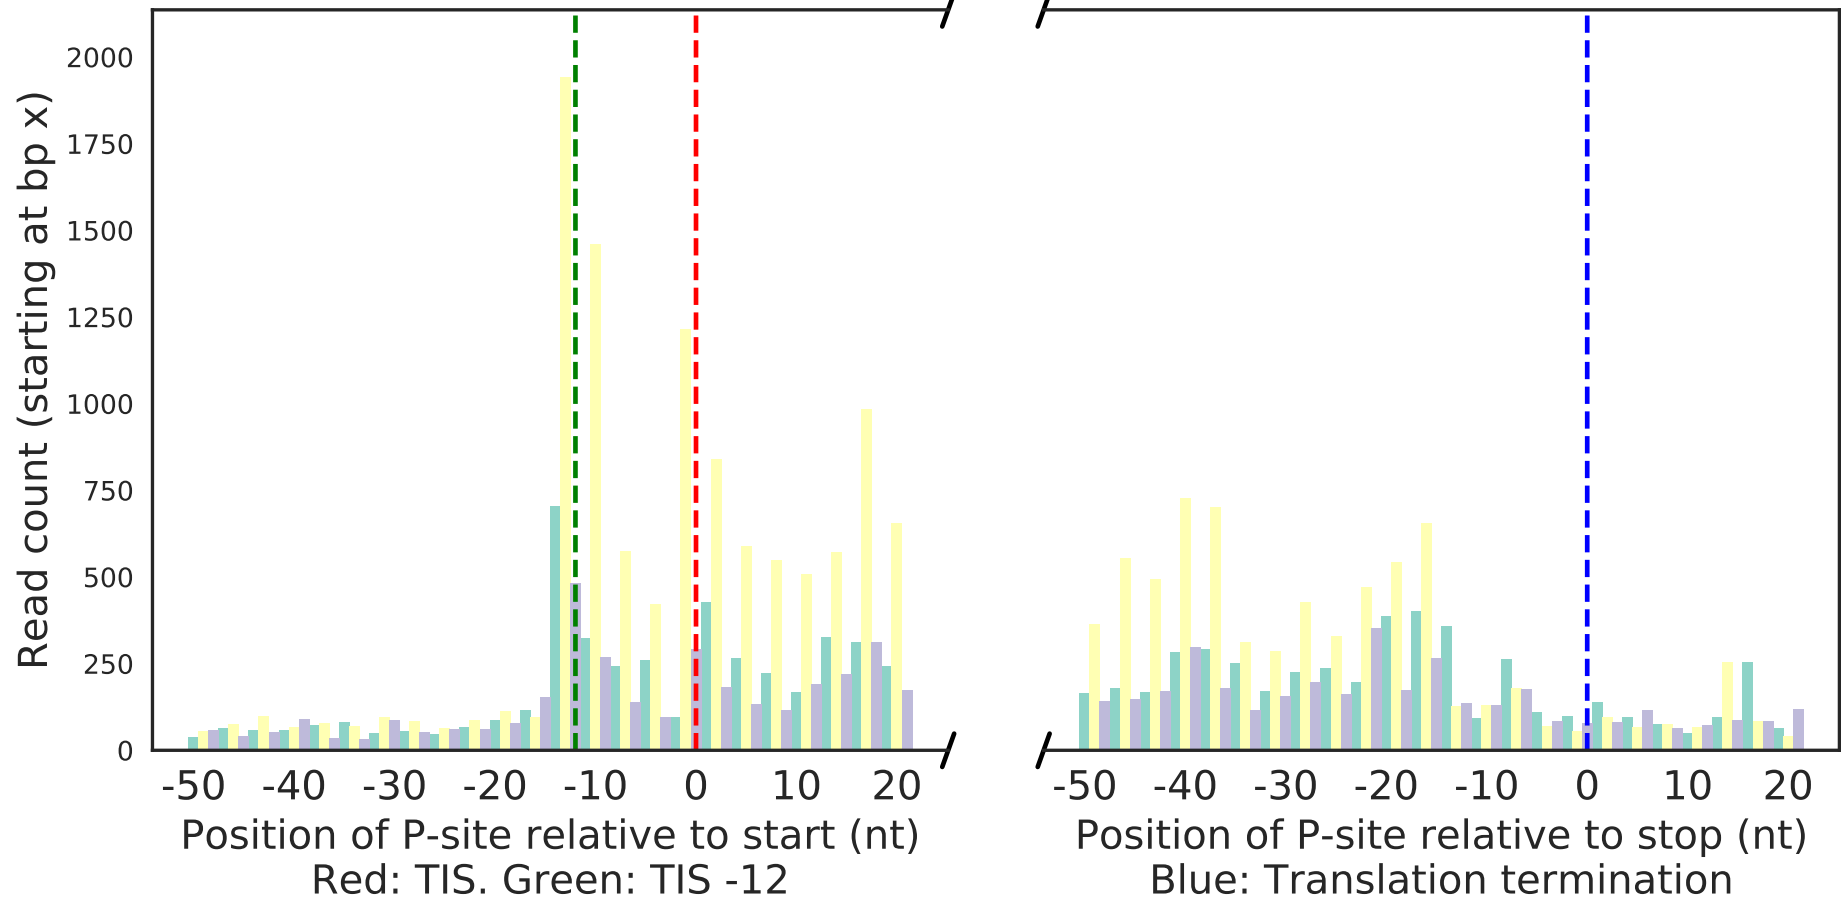

sham-tac-745. length: 35

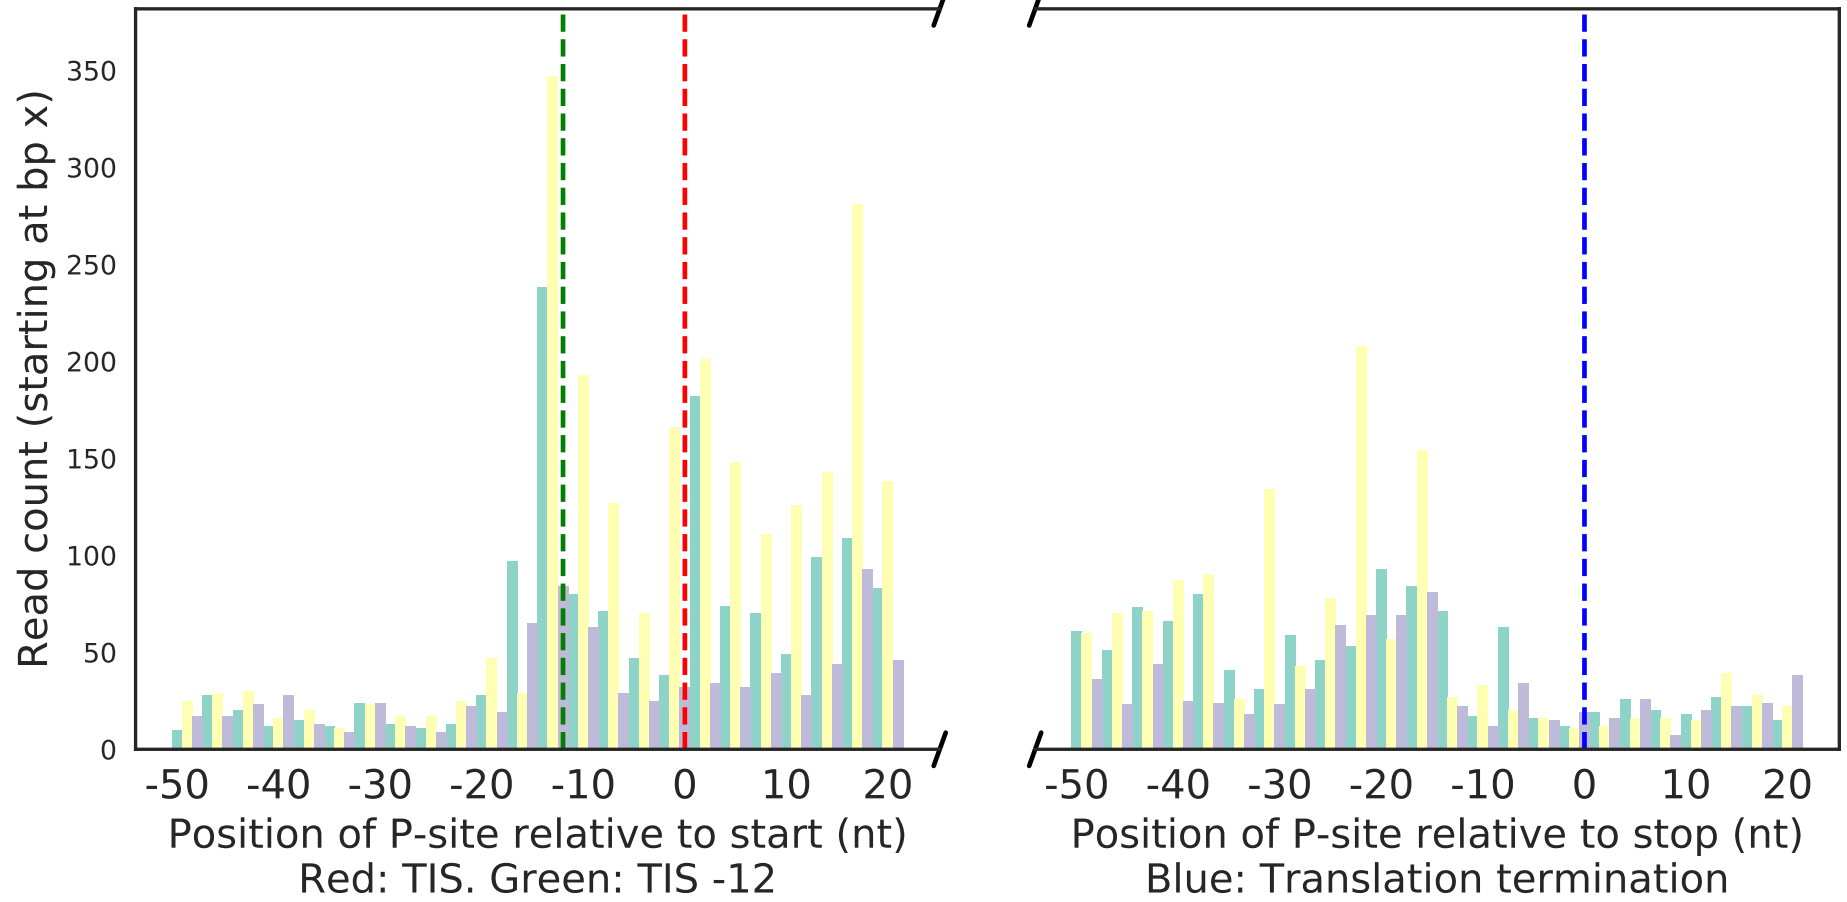



tac-3h-589. length: 30

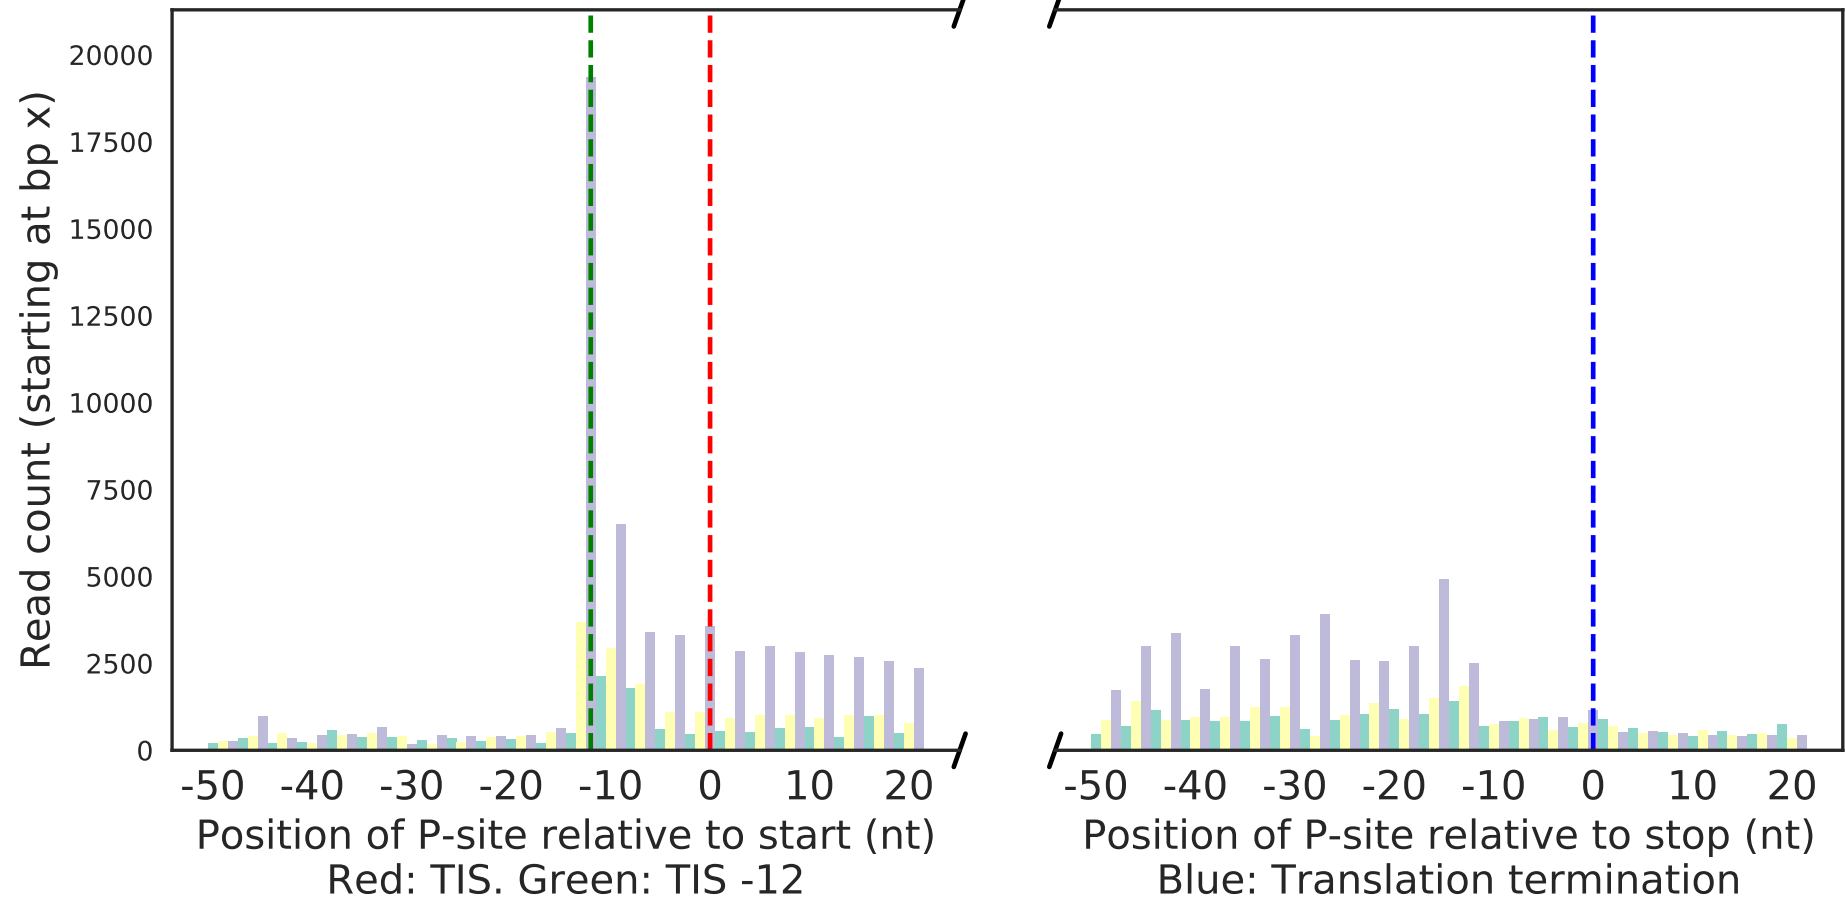

tac-3h-589. length: 31

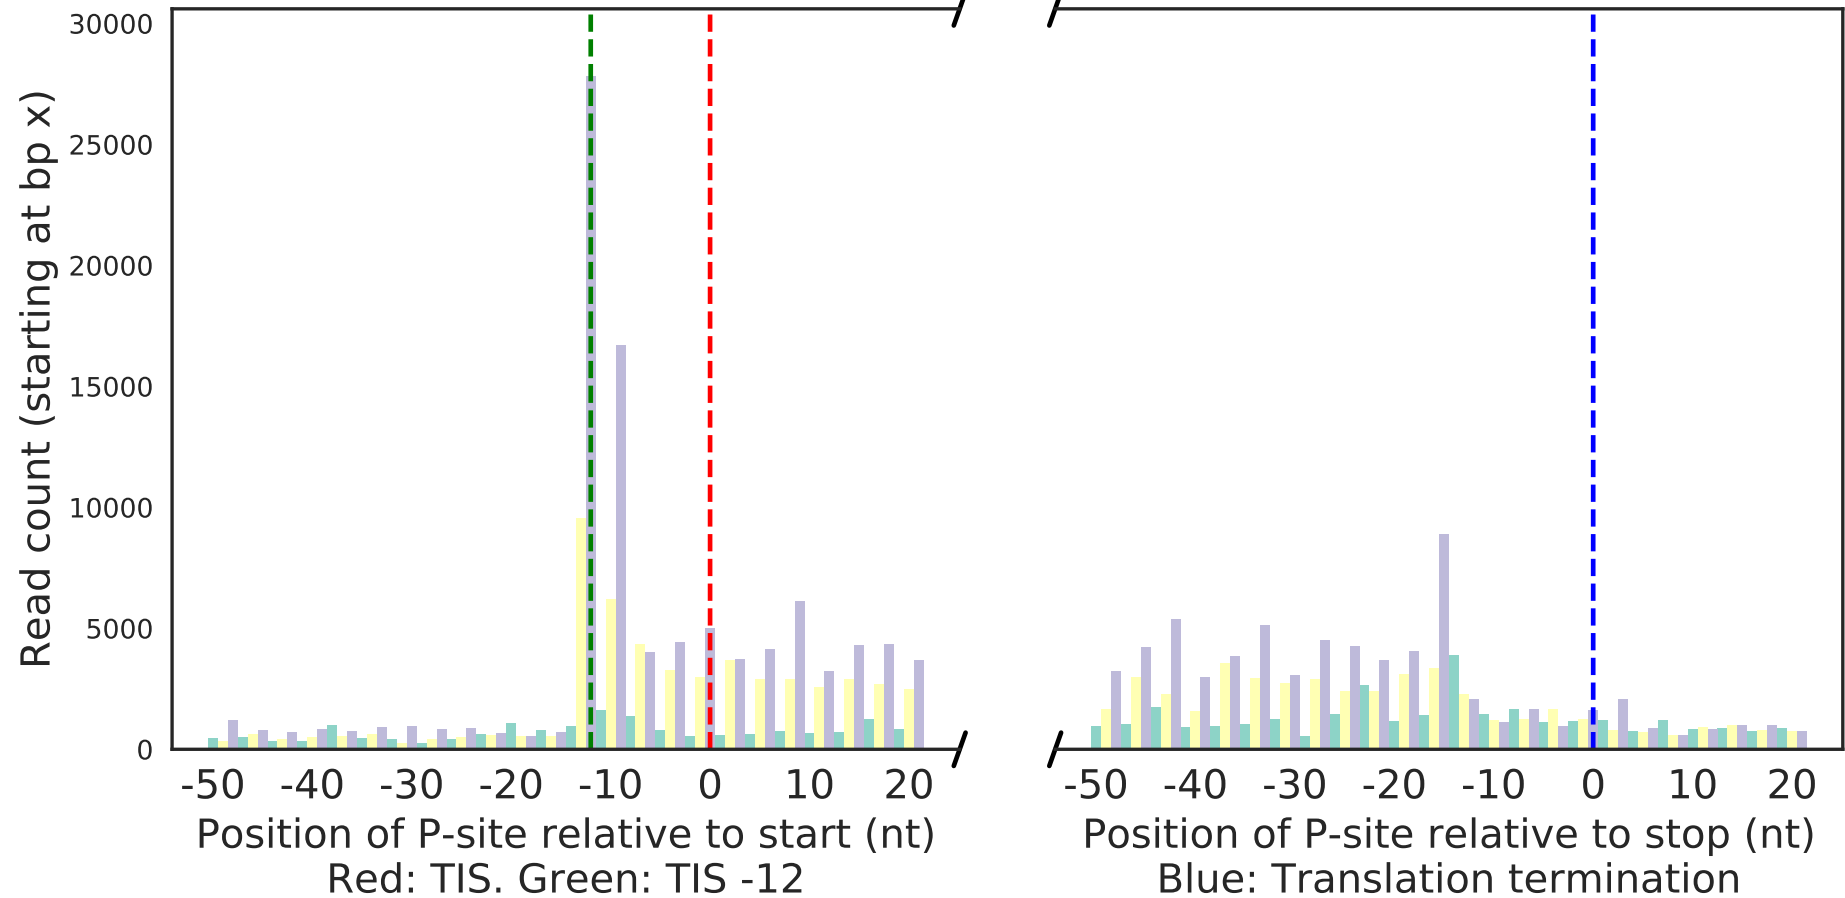

tac-3h-589. length: 33

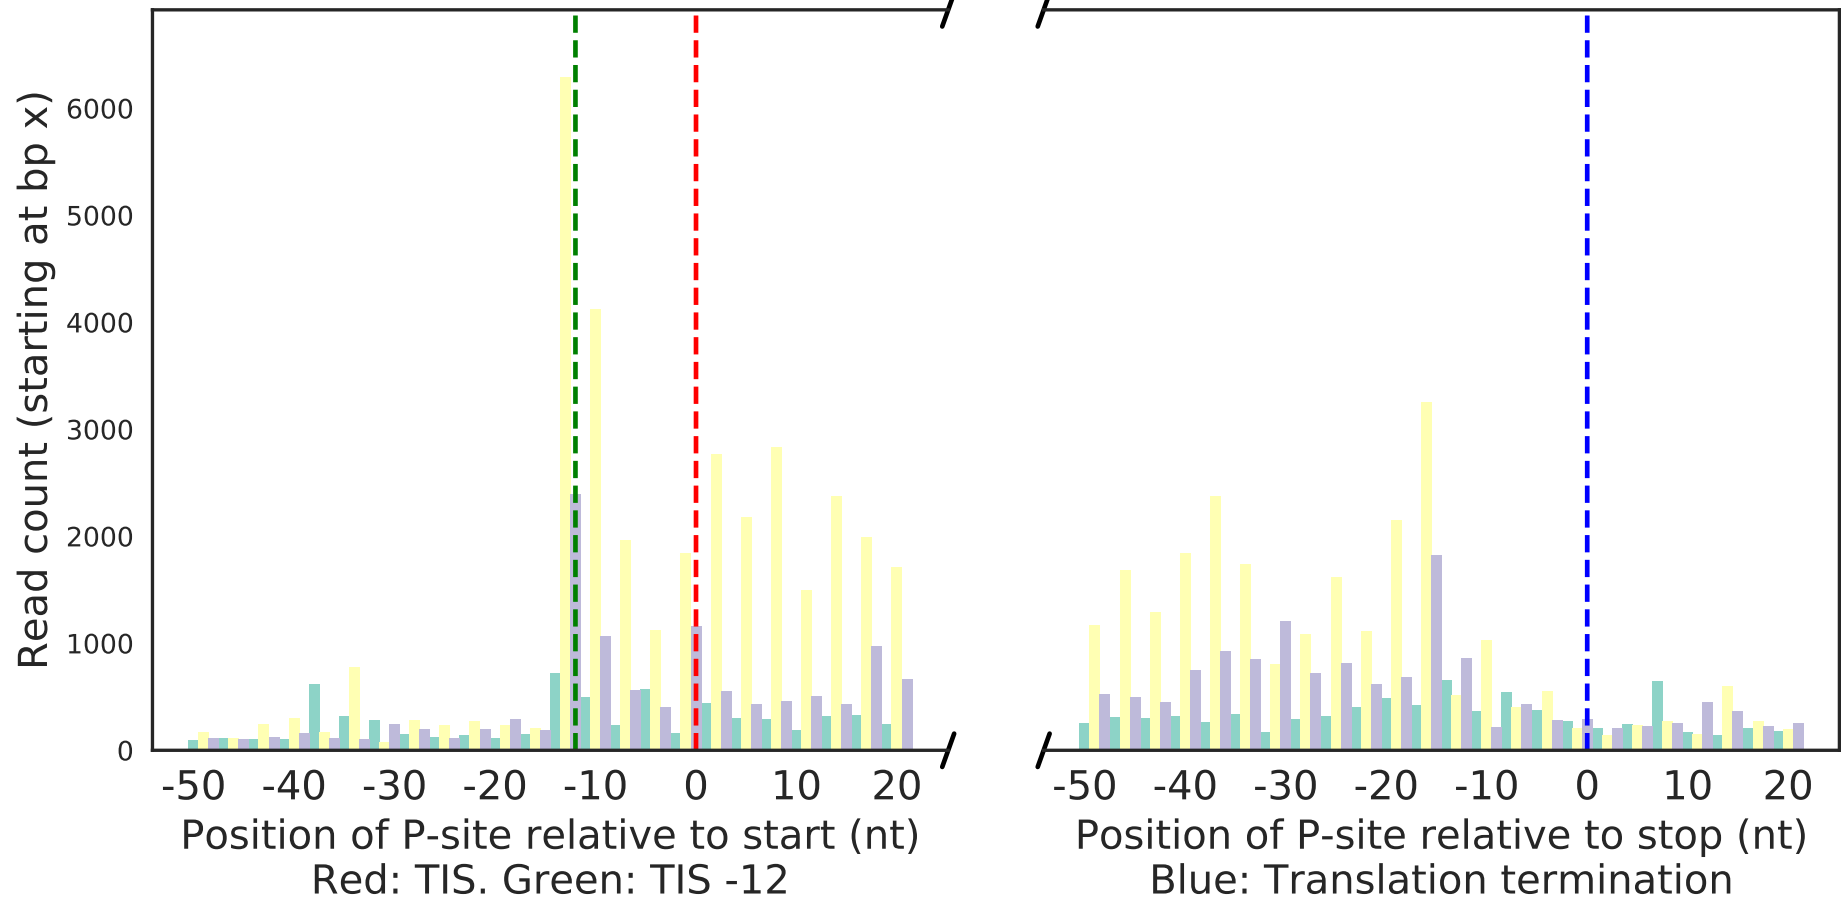

tac-3h-589. length: 34

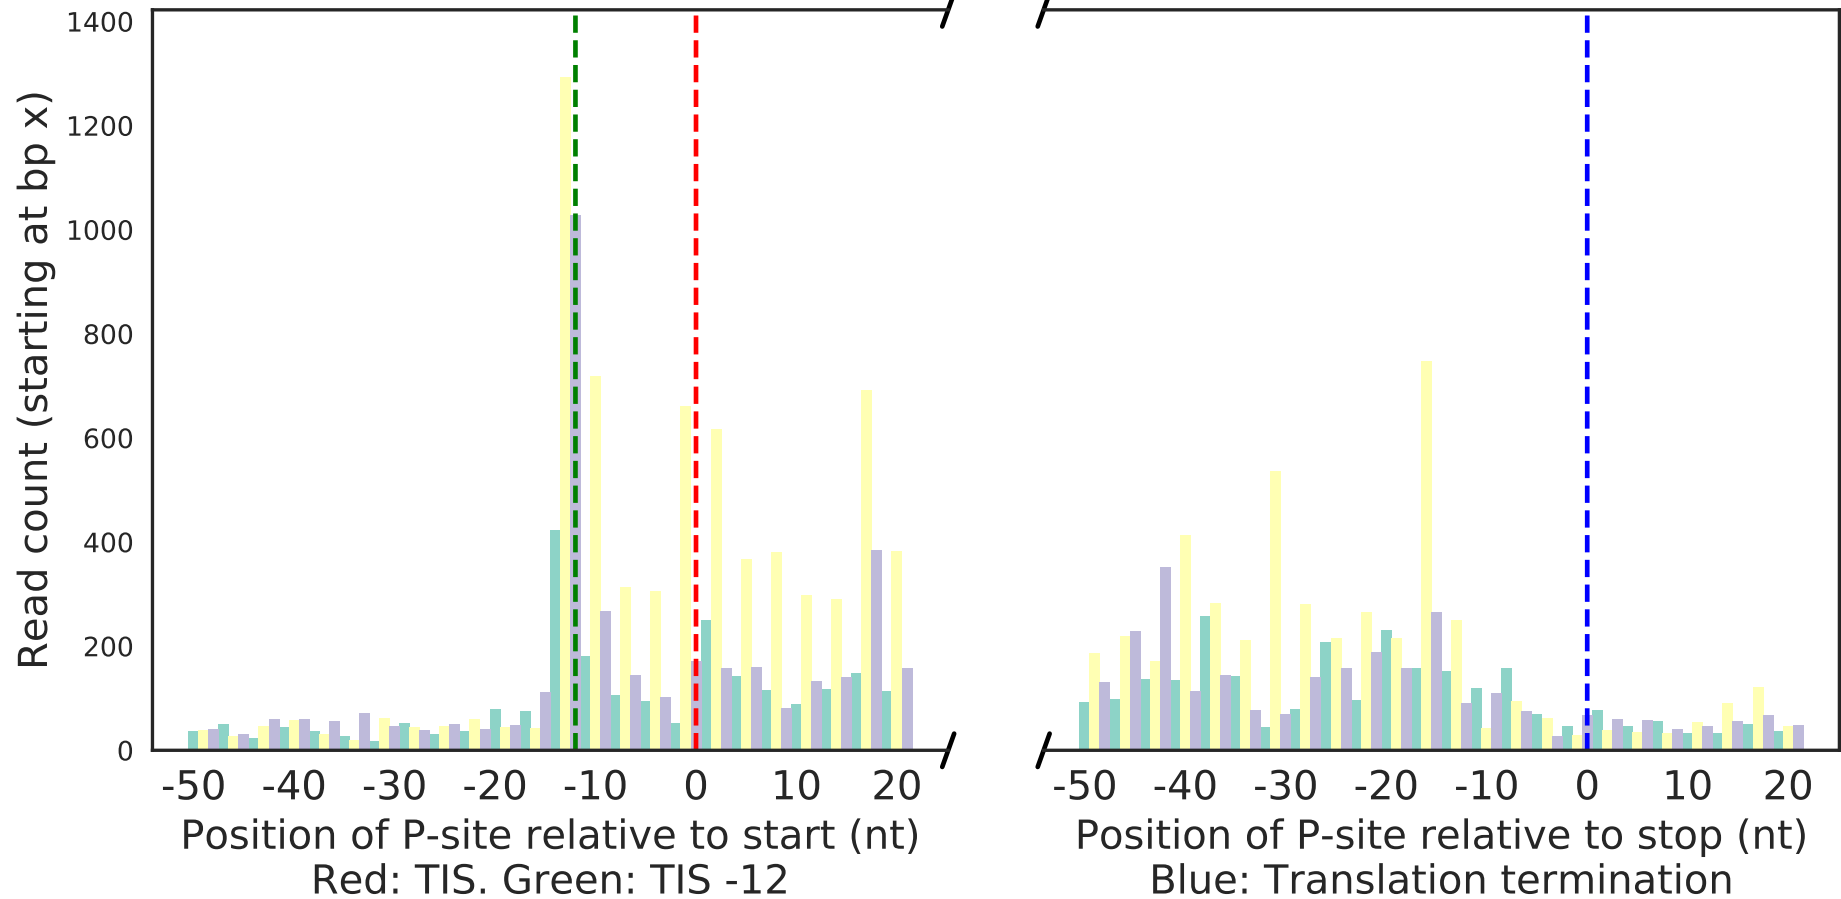

tac-3h-589. length: 35

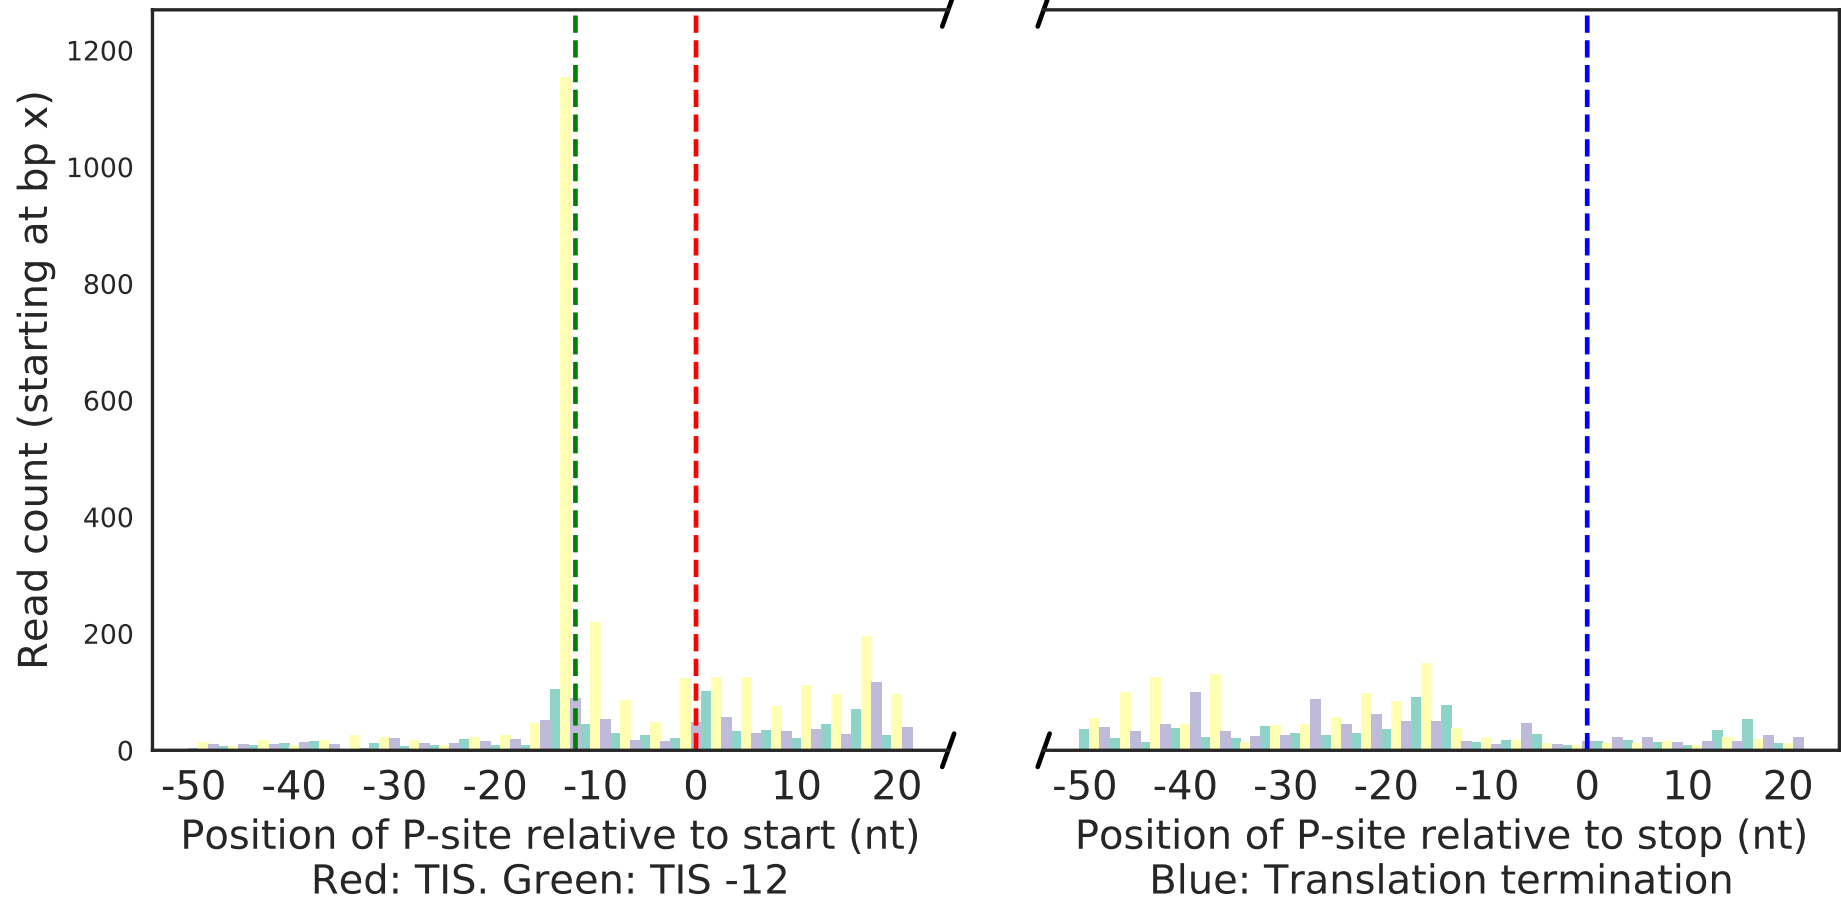

tac-3h-590. length: 29

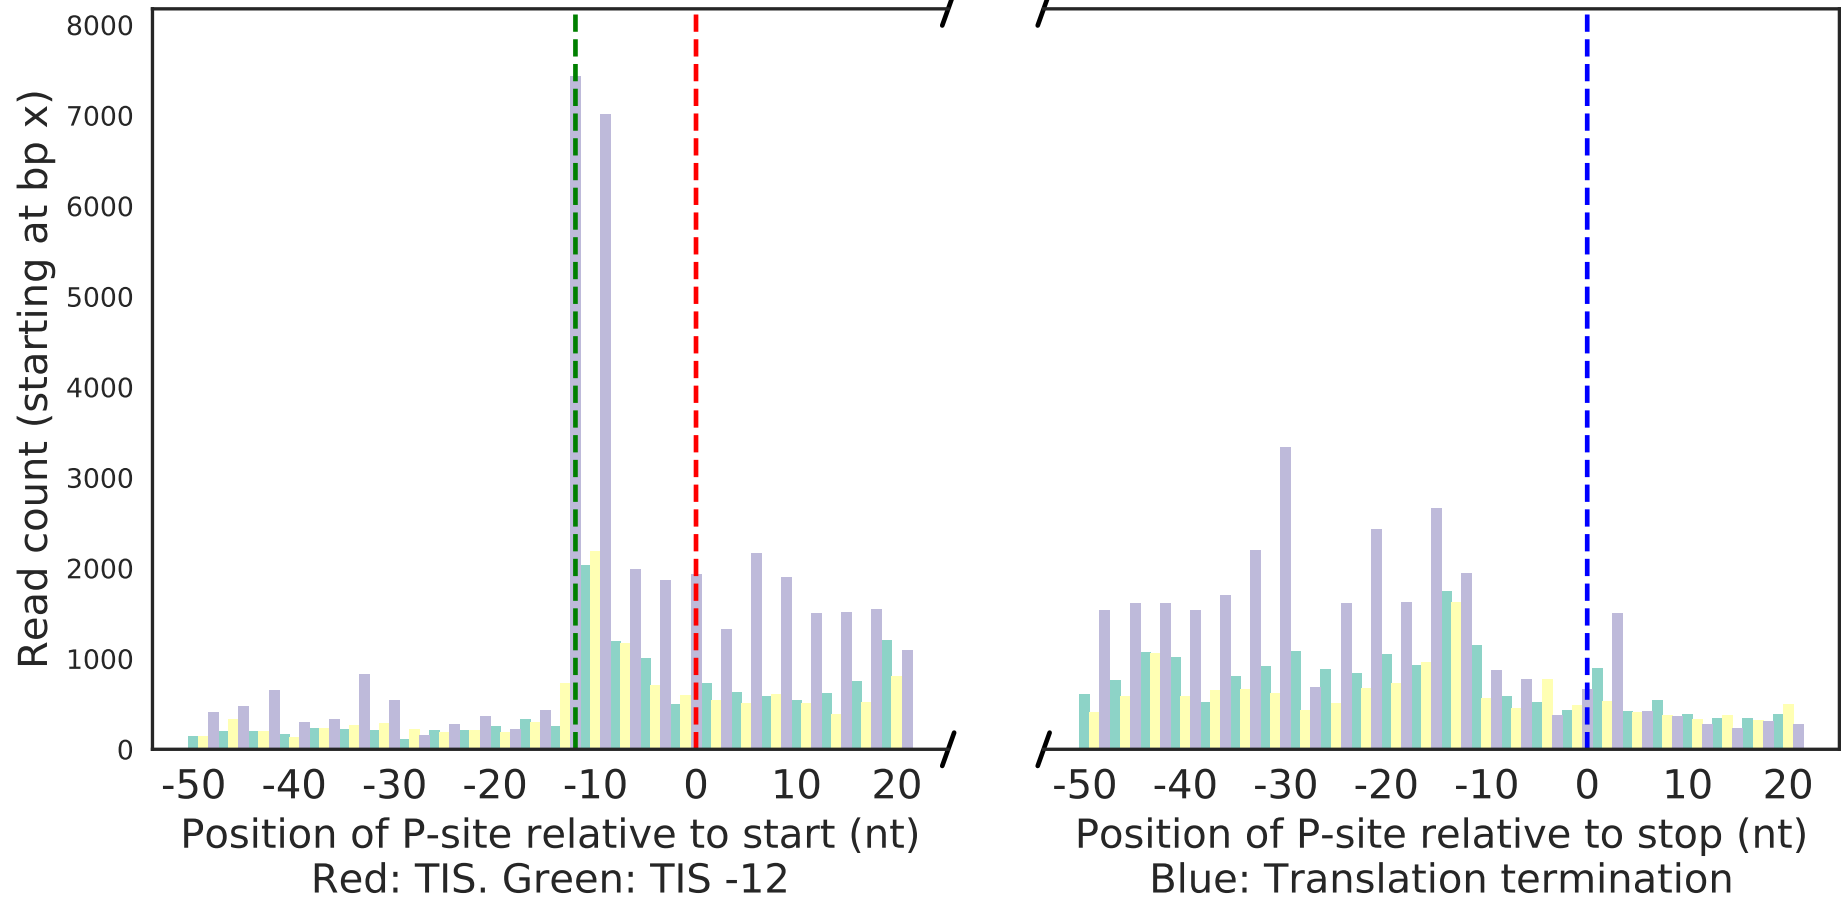

tac-3h-590. length: 30

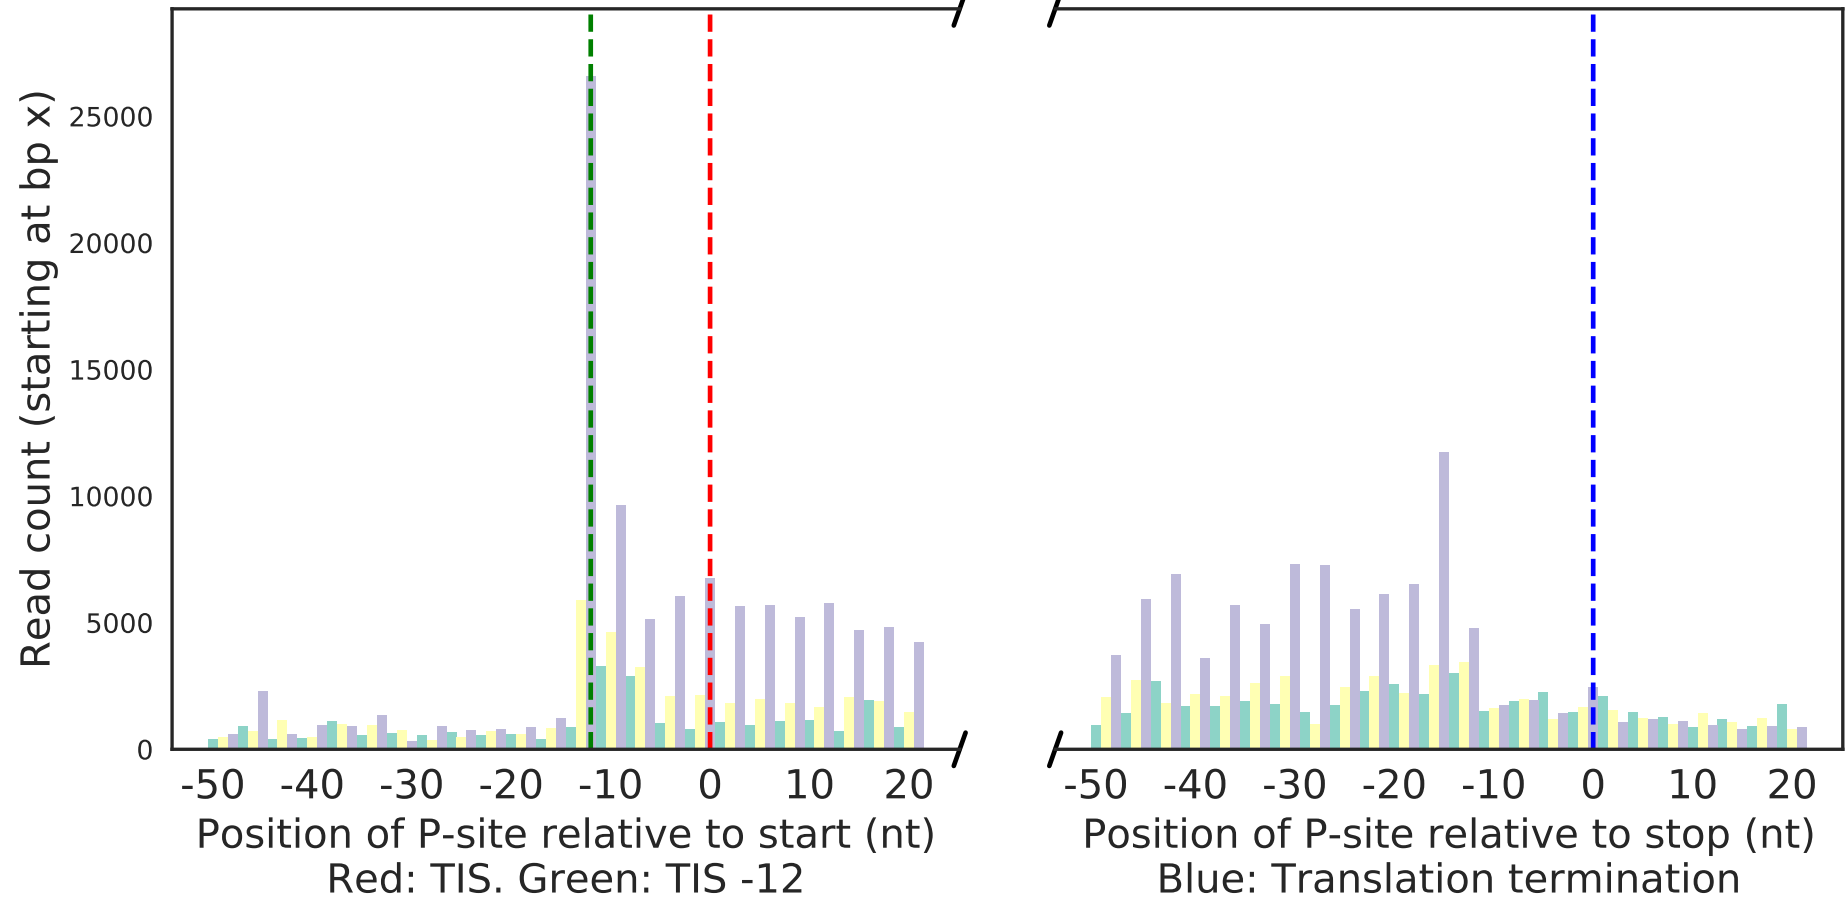

tac-3h-590. length: 32

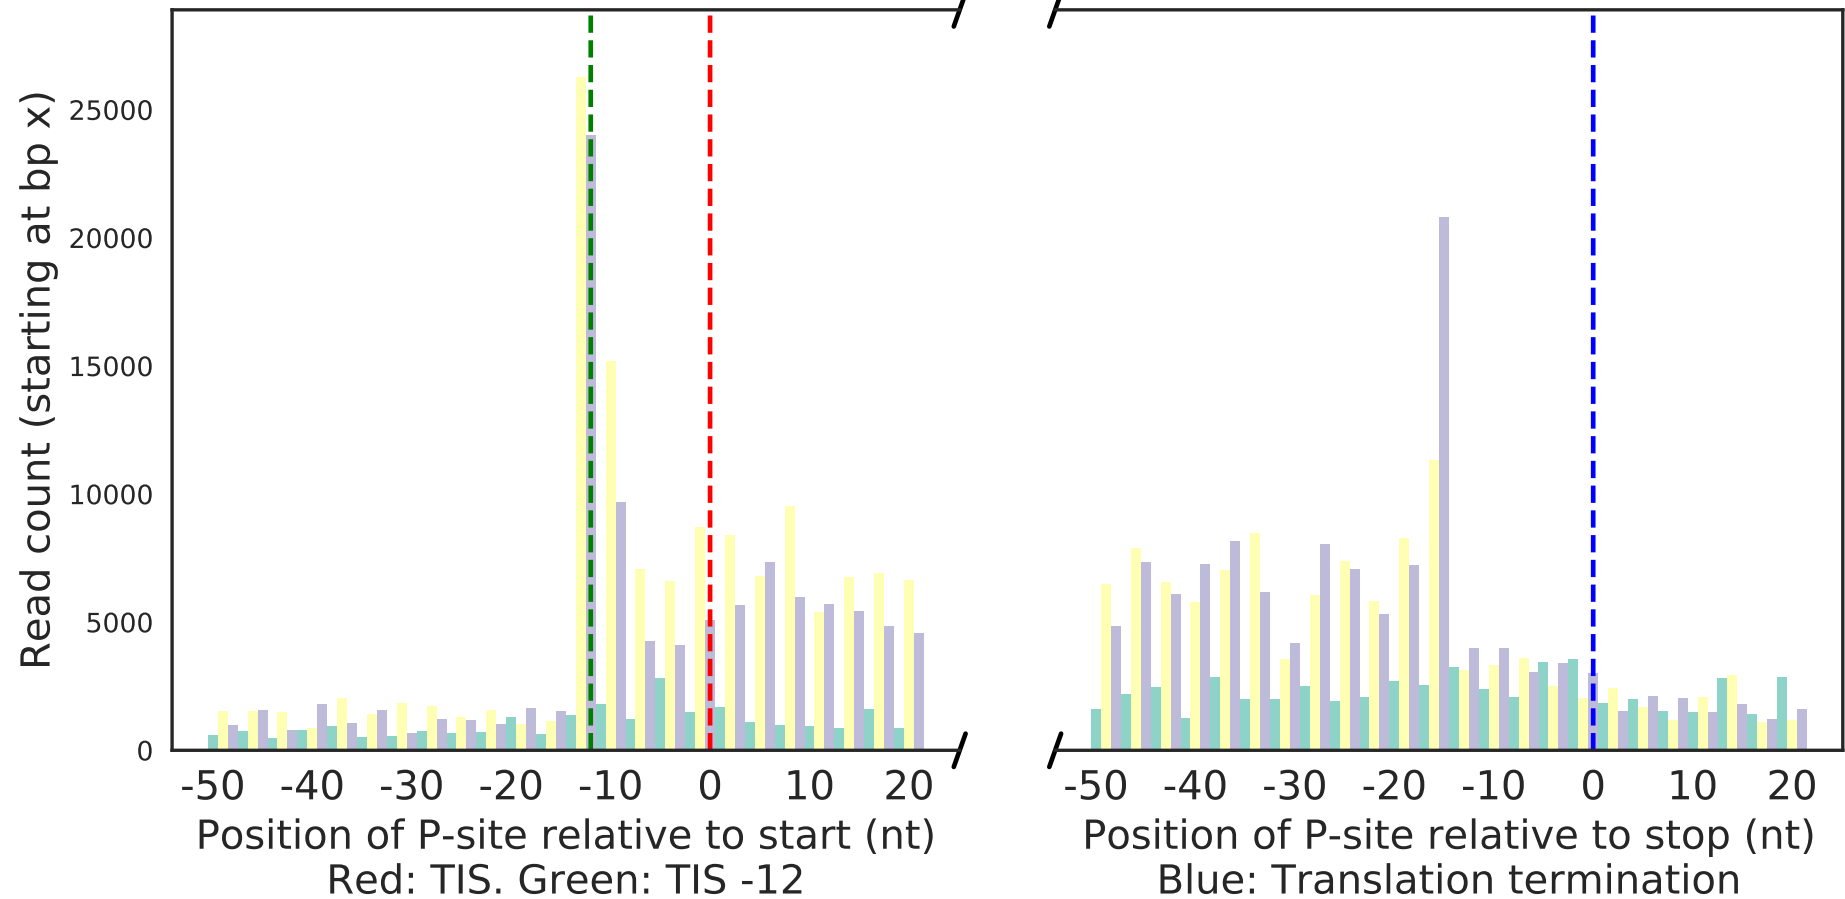



tac-3h-590. length: 33

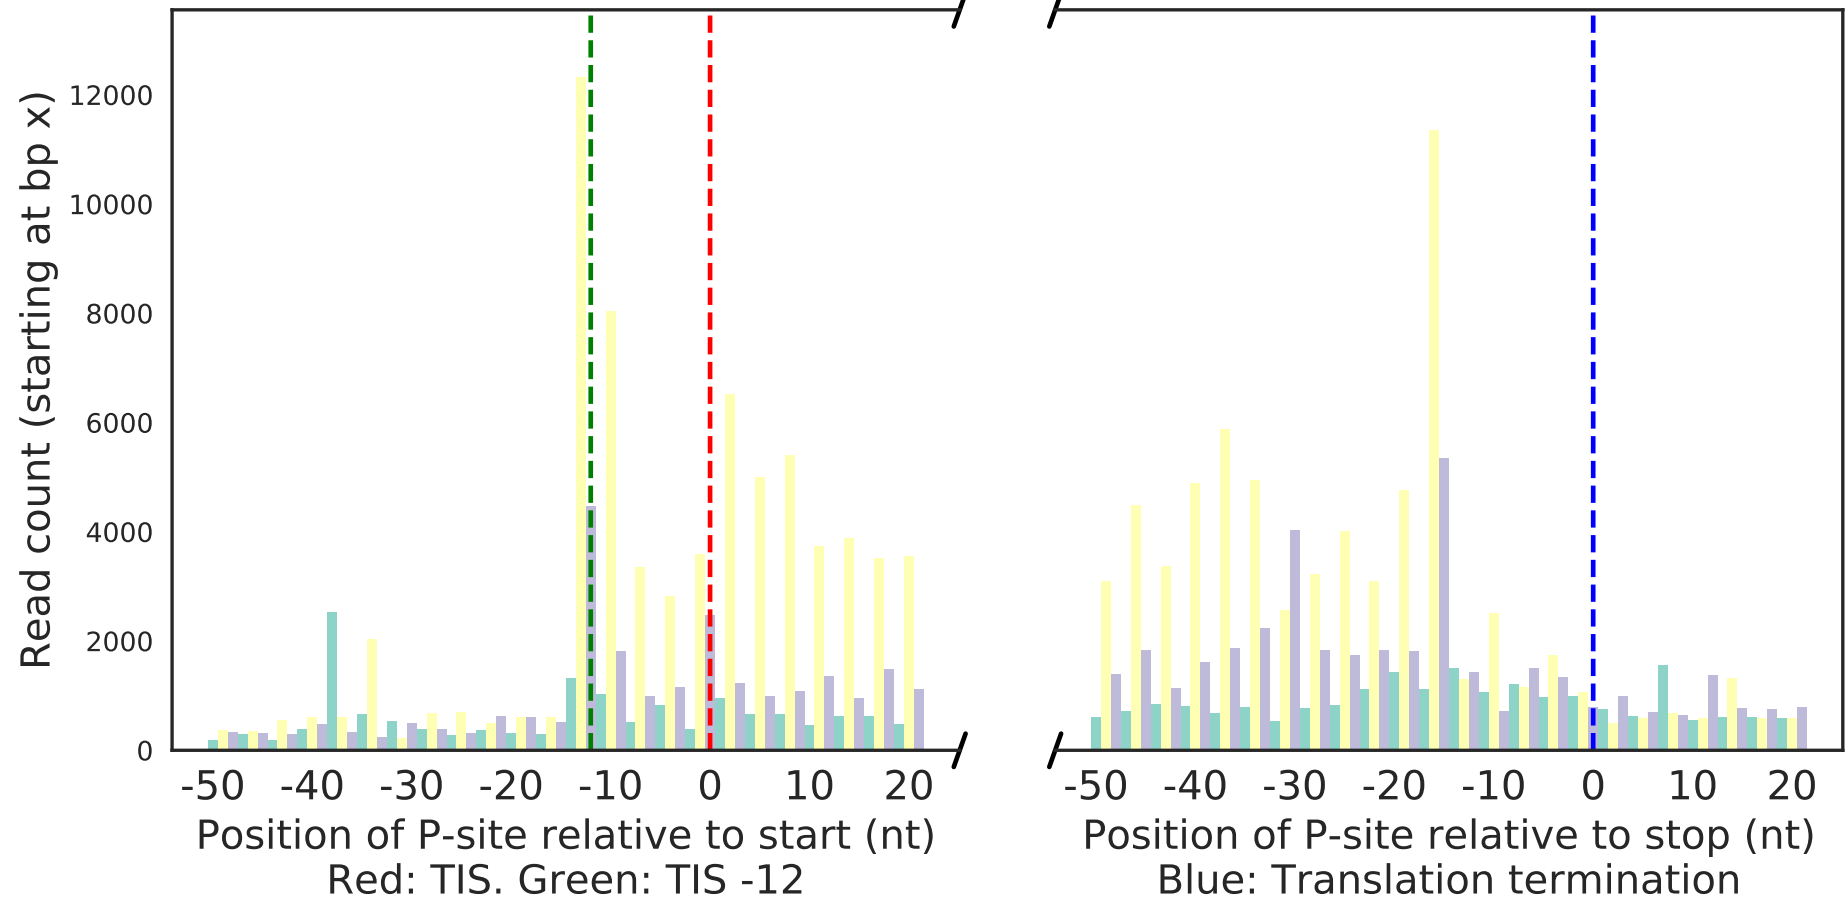

tac-3h-590. length: 34

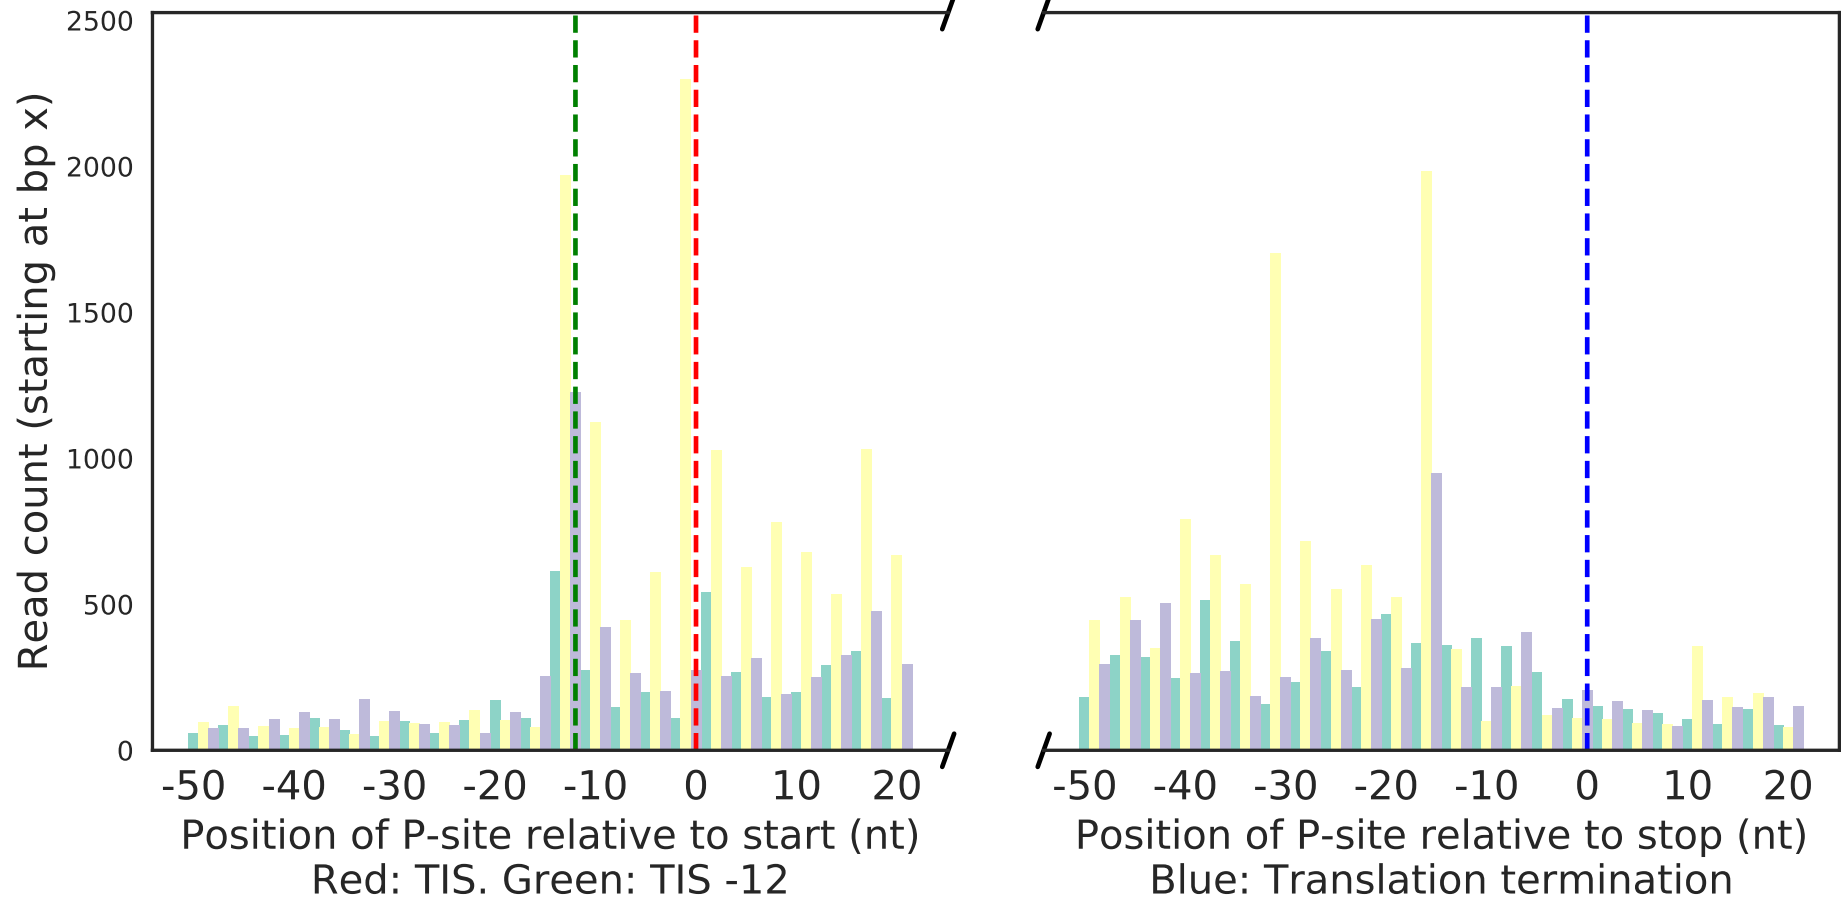

tac-3h-590. length: 35

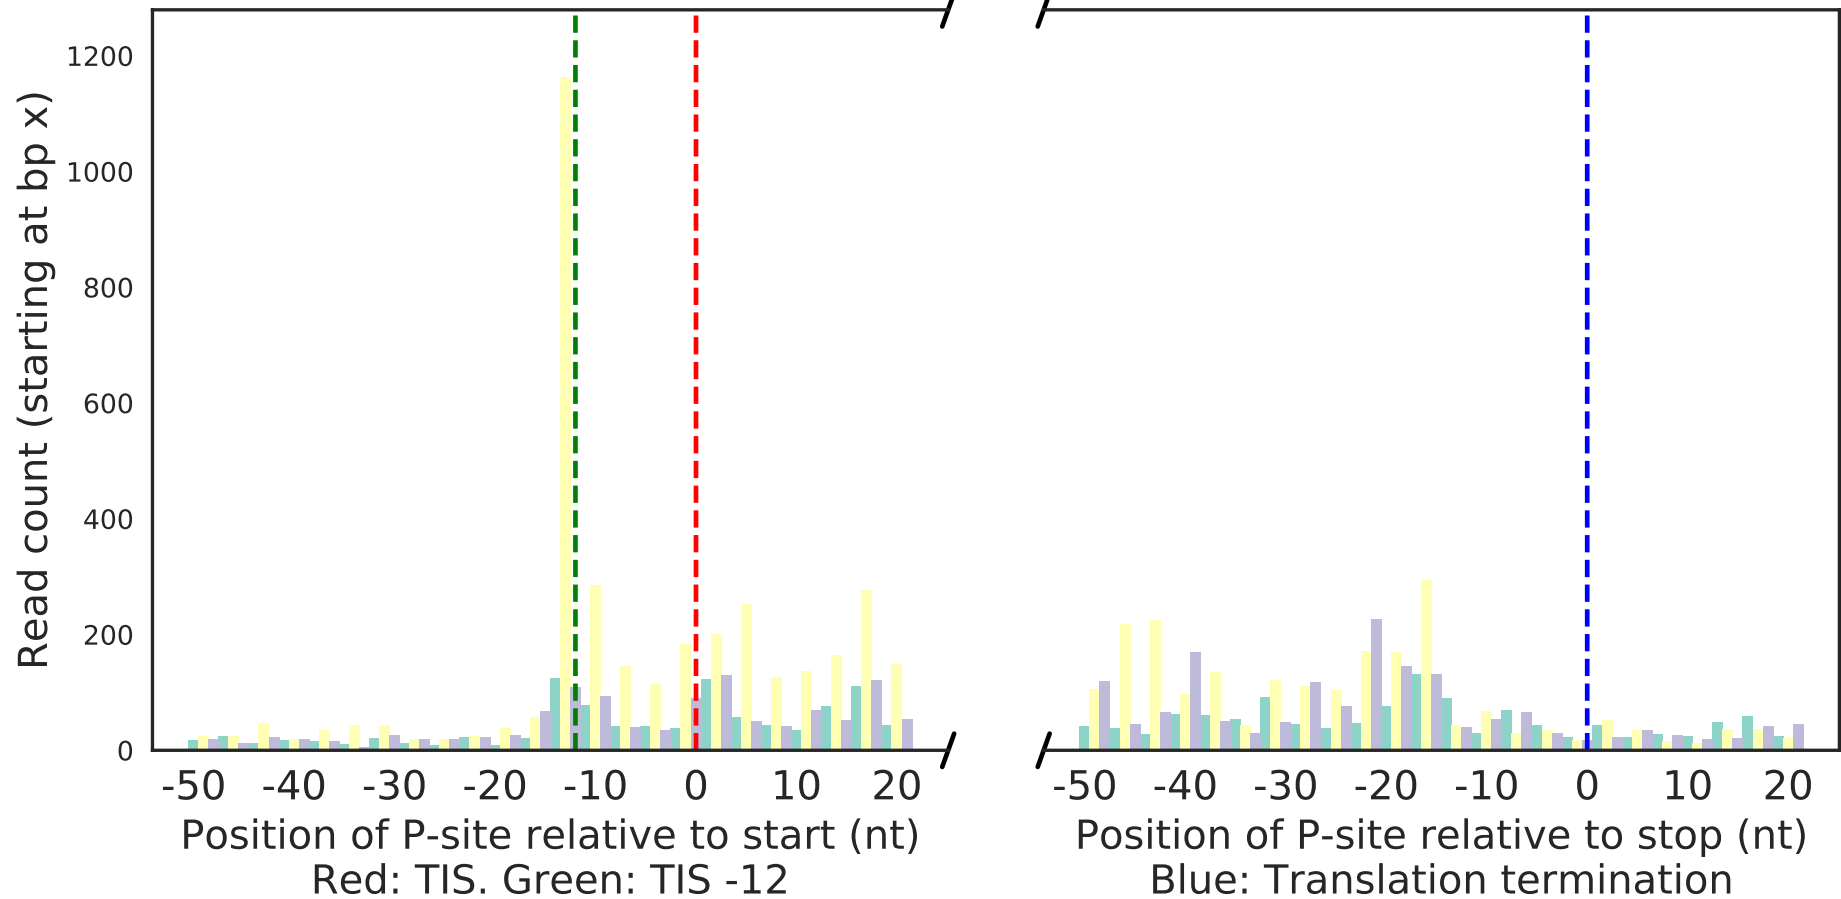

tac-3h-591. length: 29

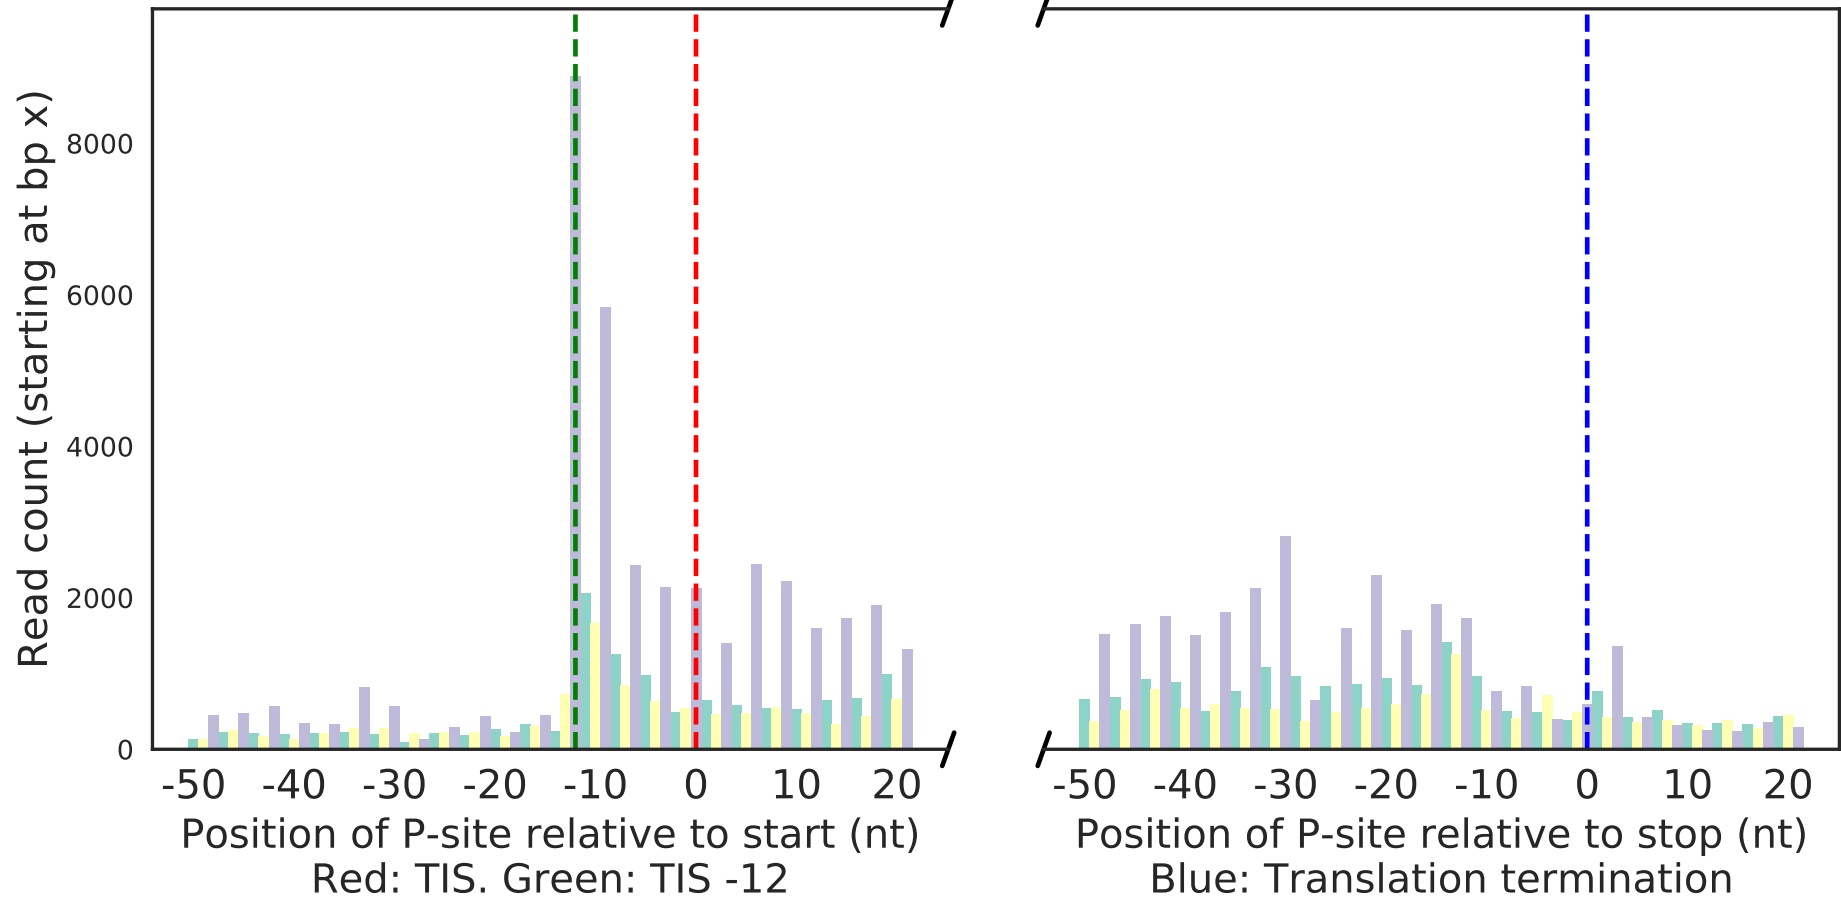

tac-3h-591. length: 30

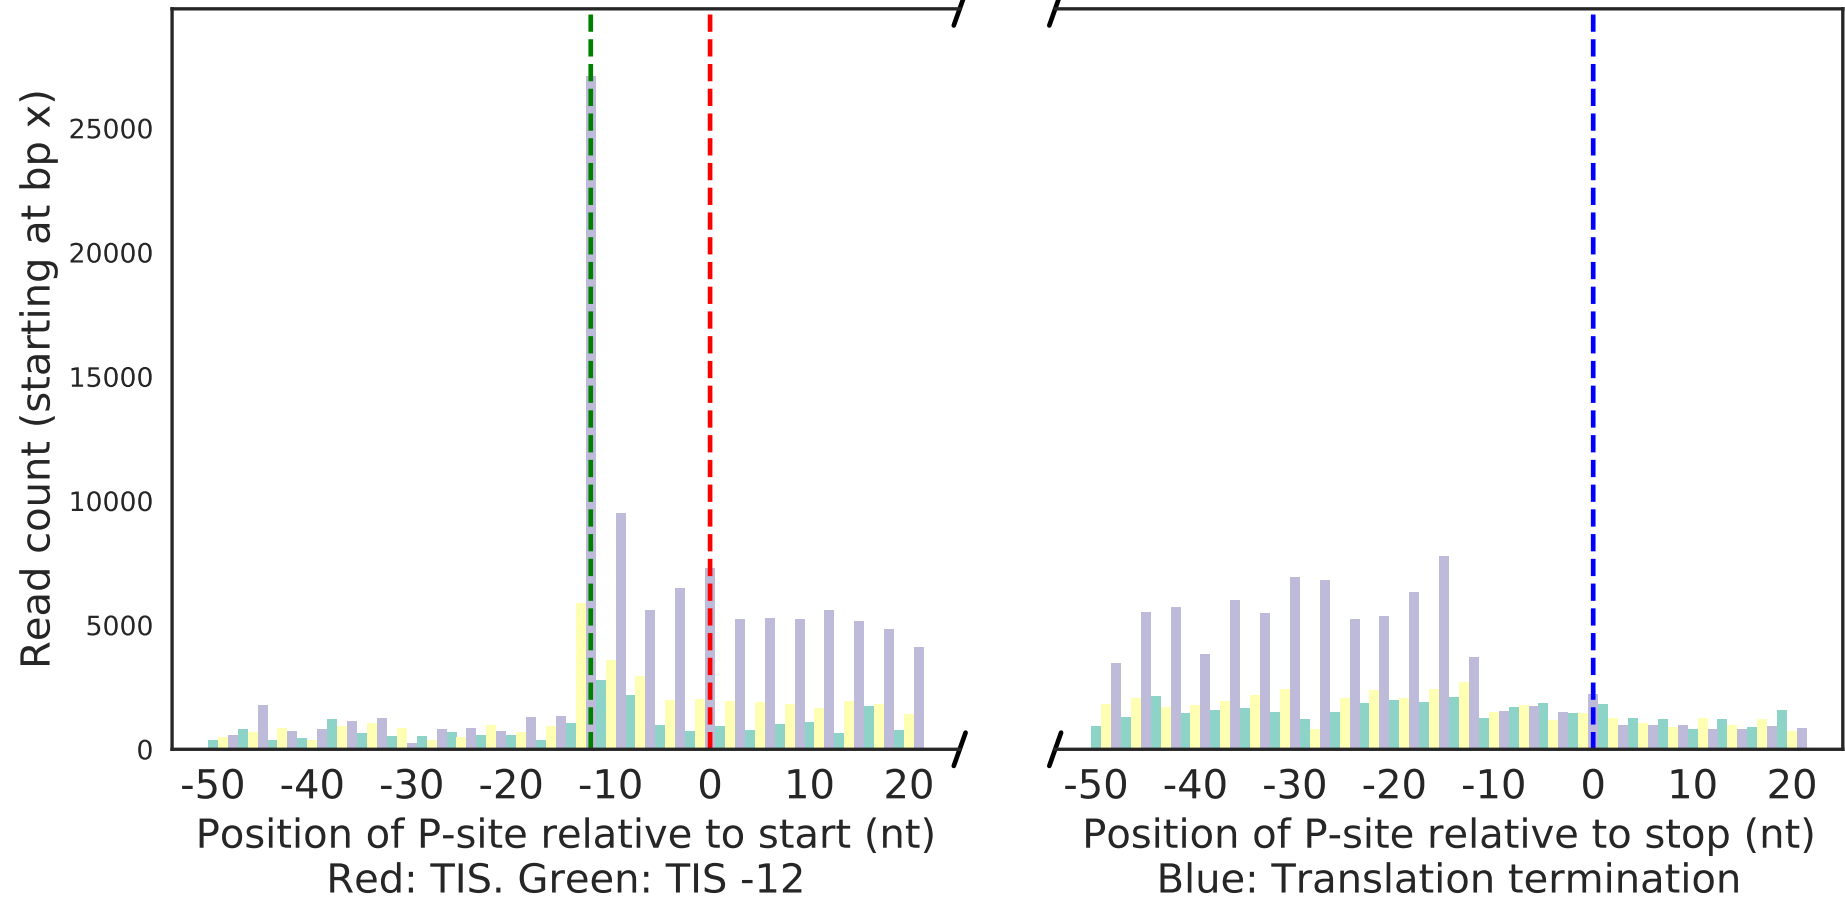

tac-3h-591. length: 33

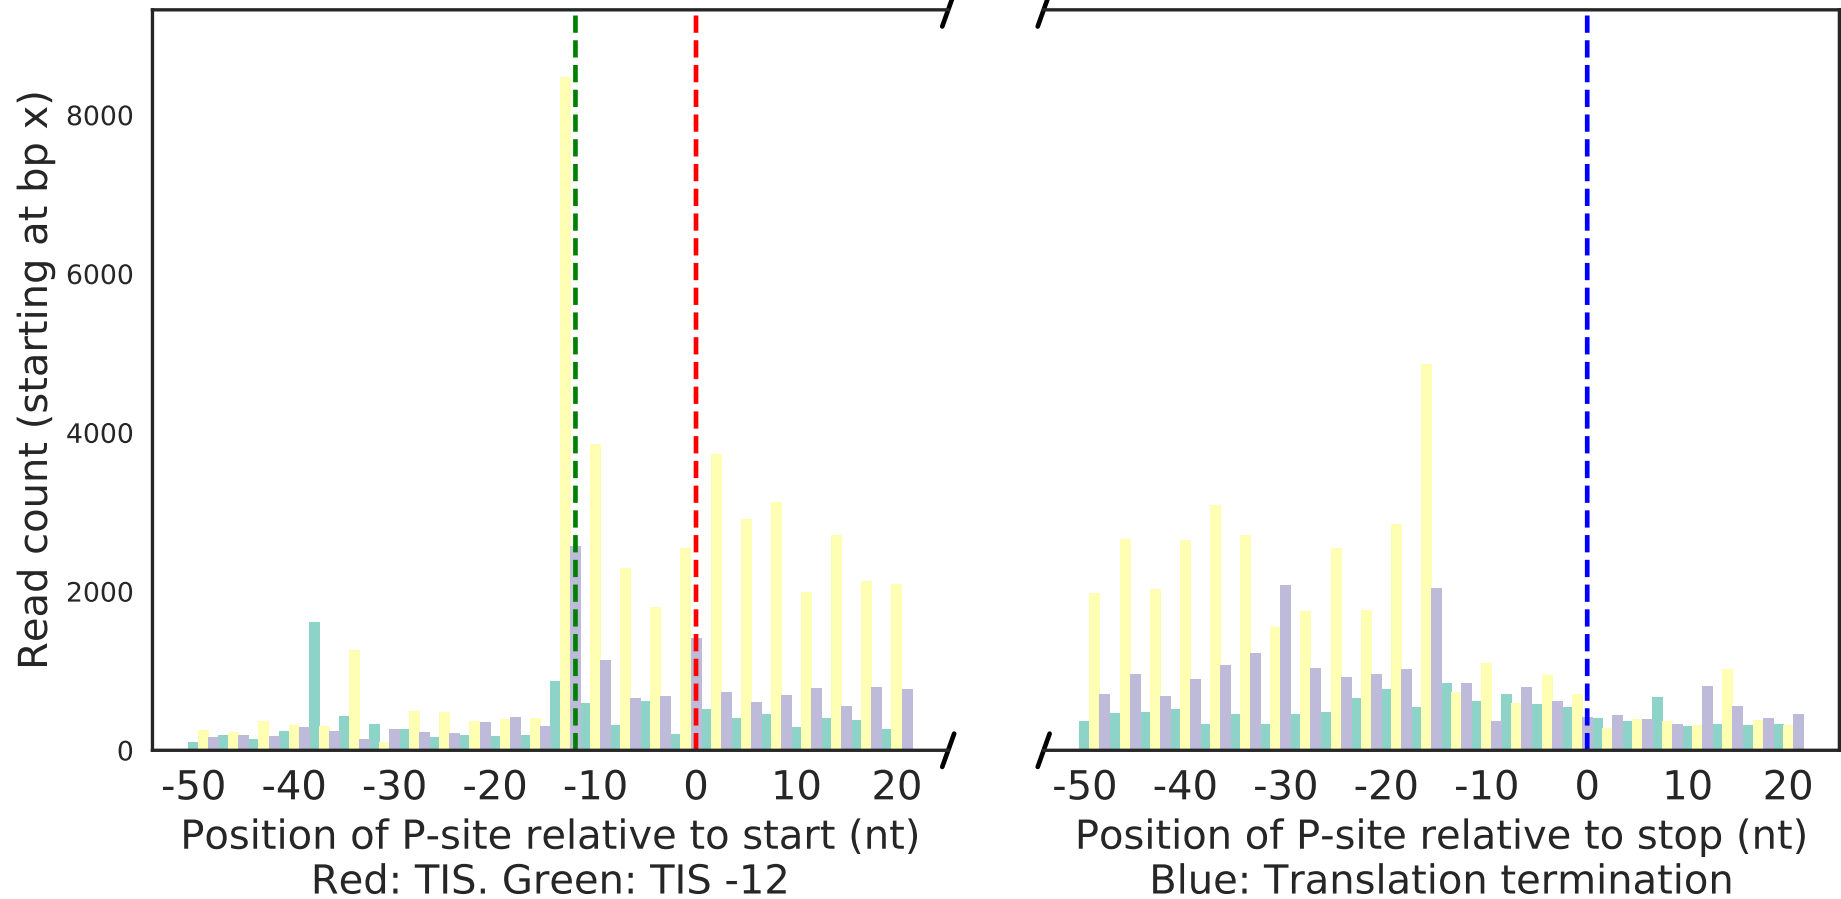

tac-3h-591. length: 34

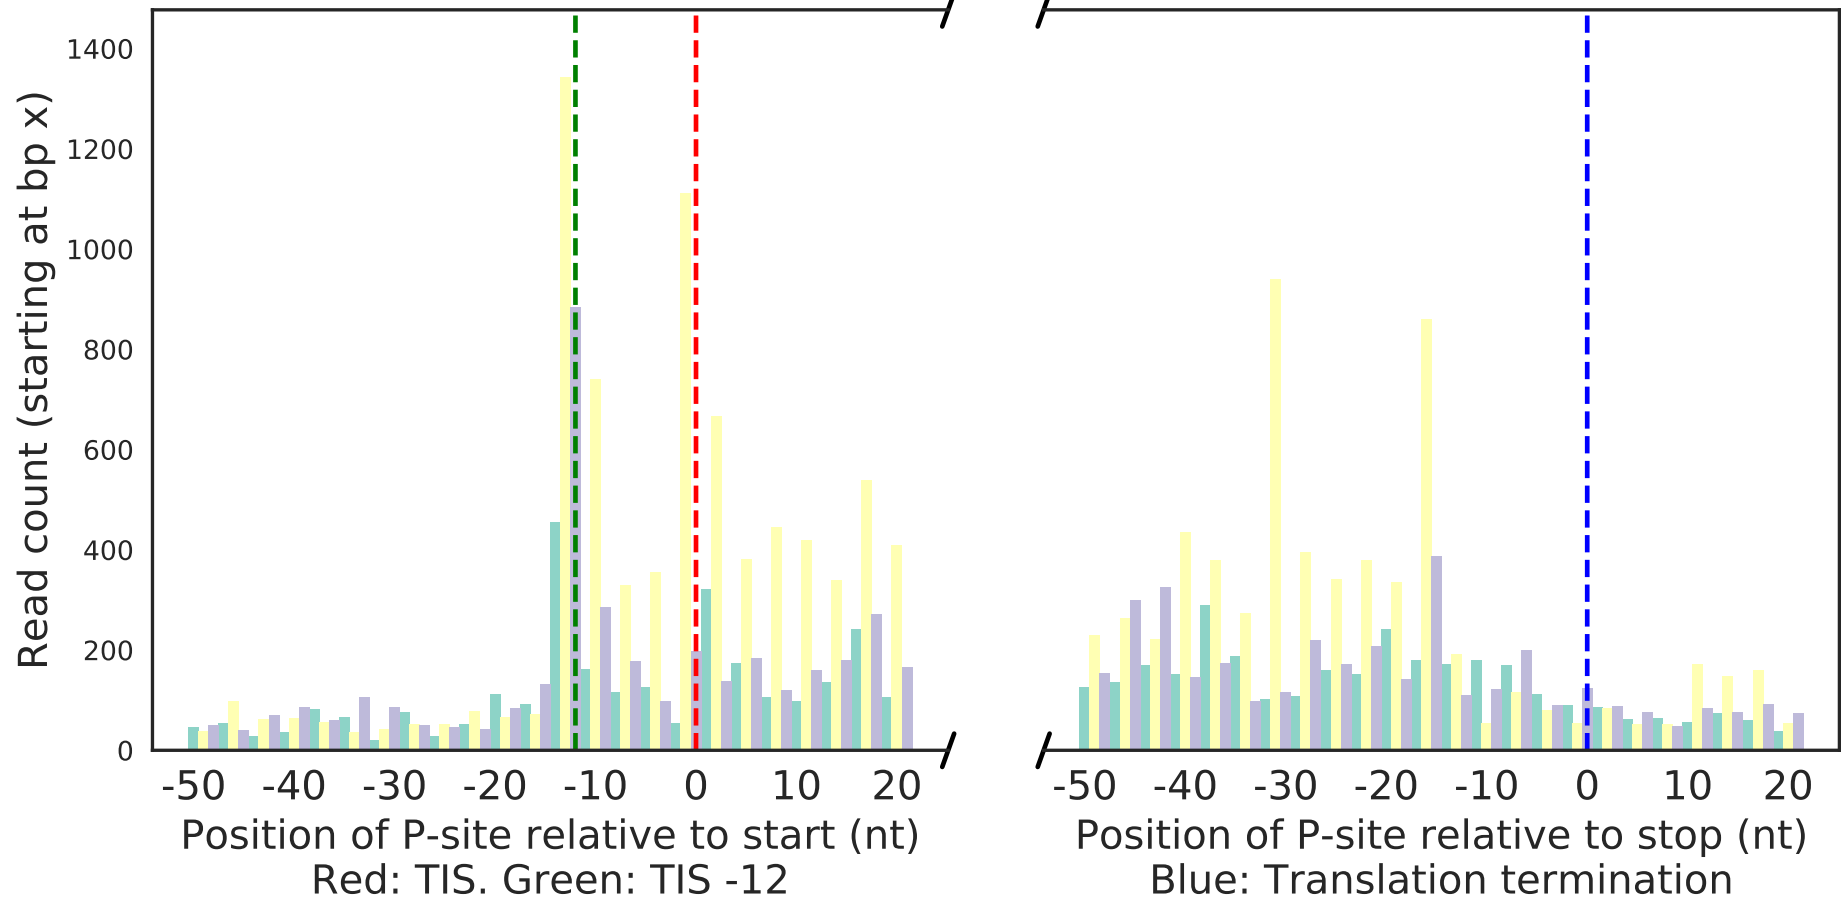

tac-3h-591. length: 35

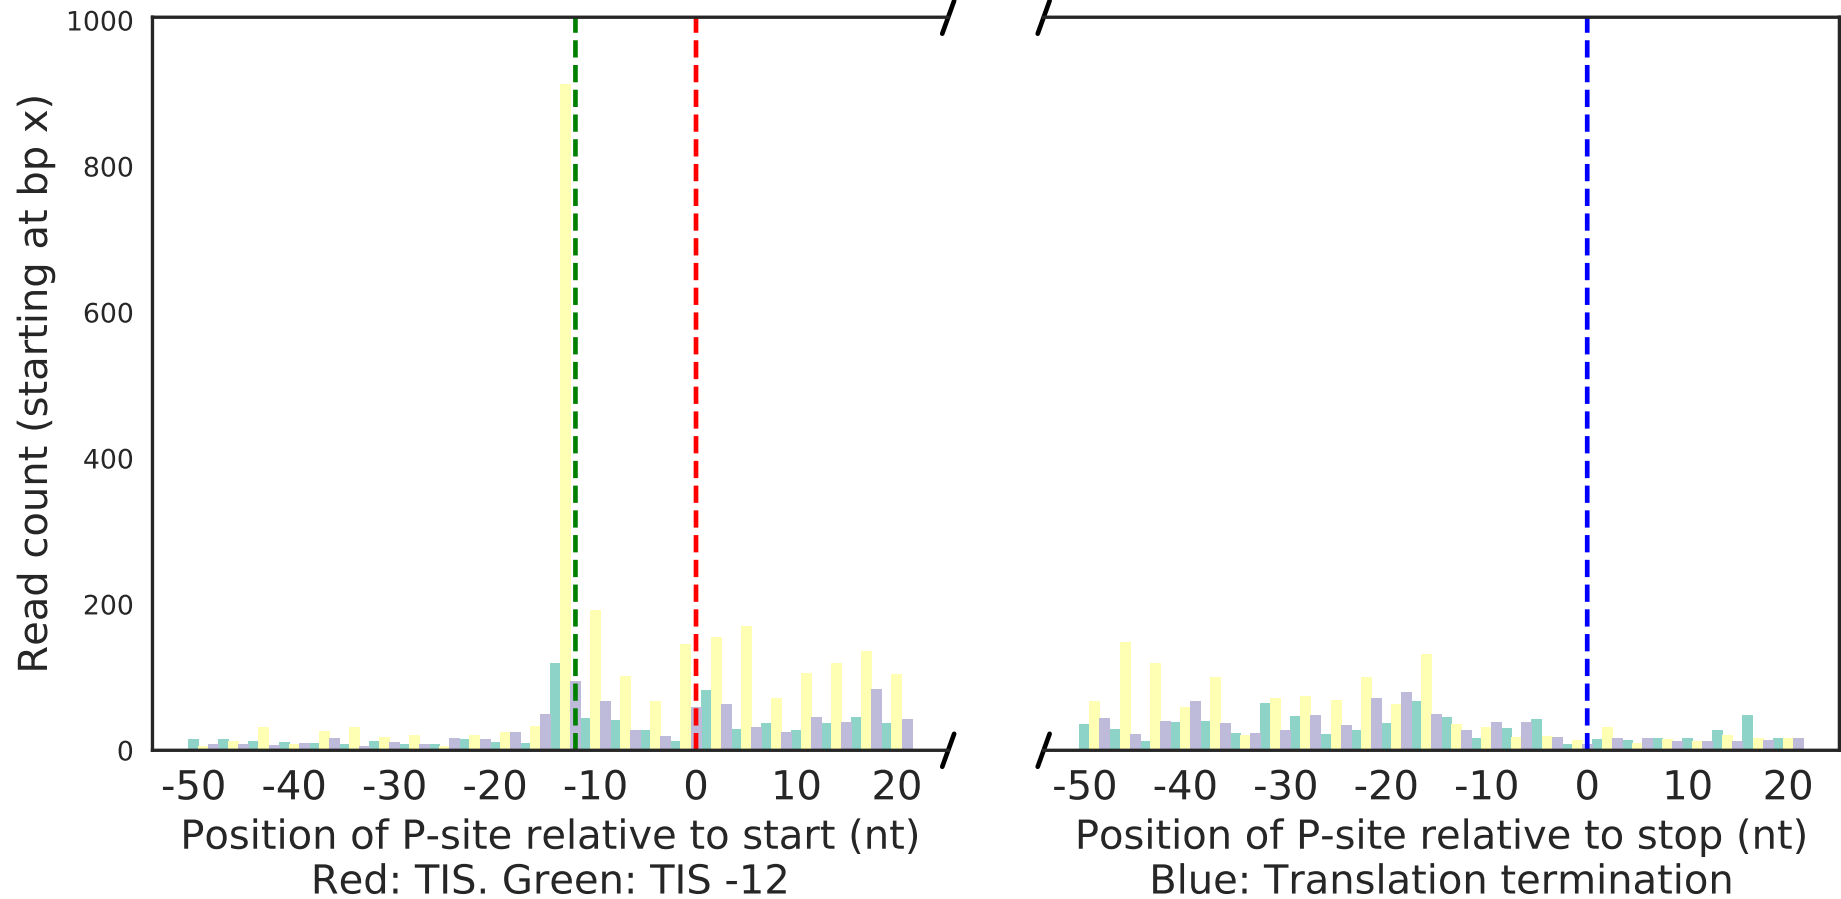



tac-2w-677. length: 32

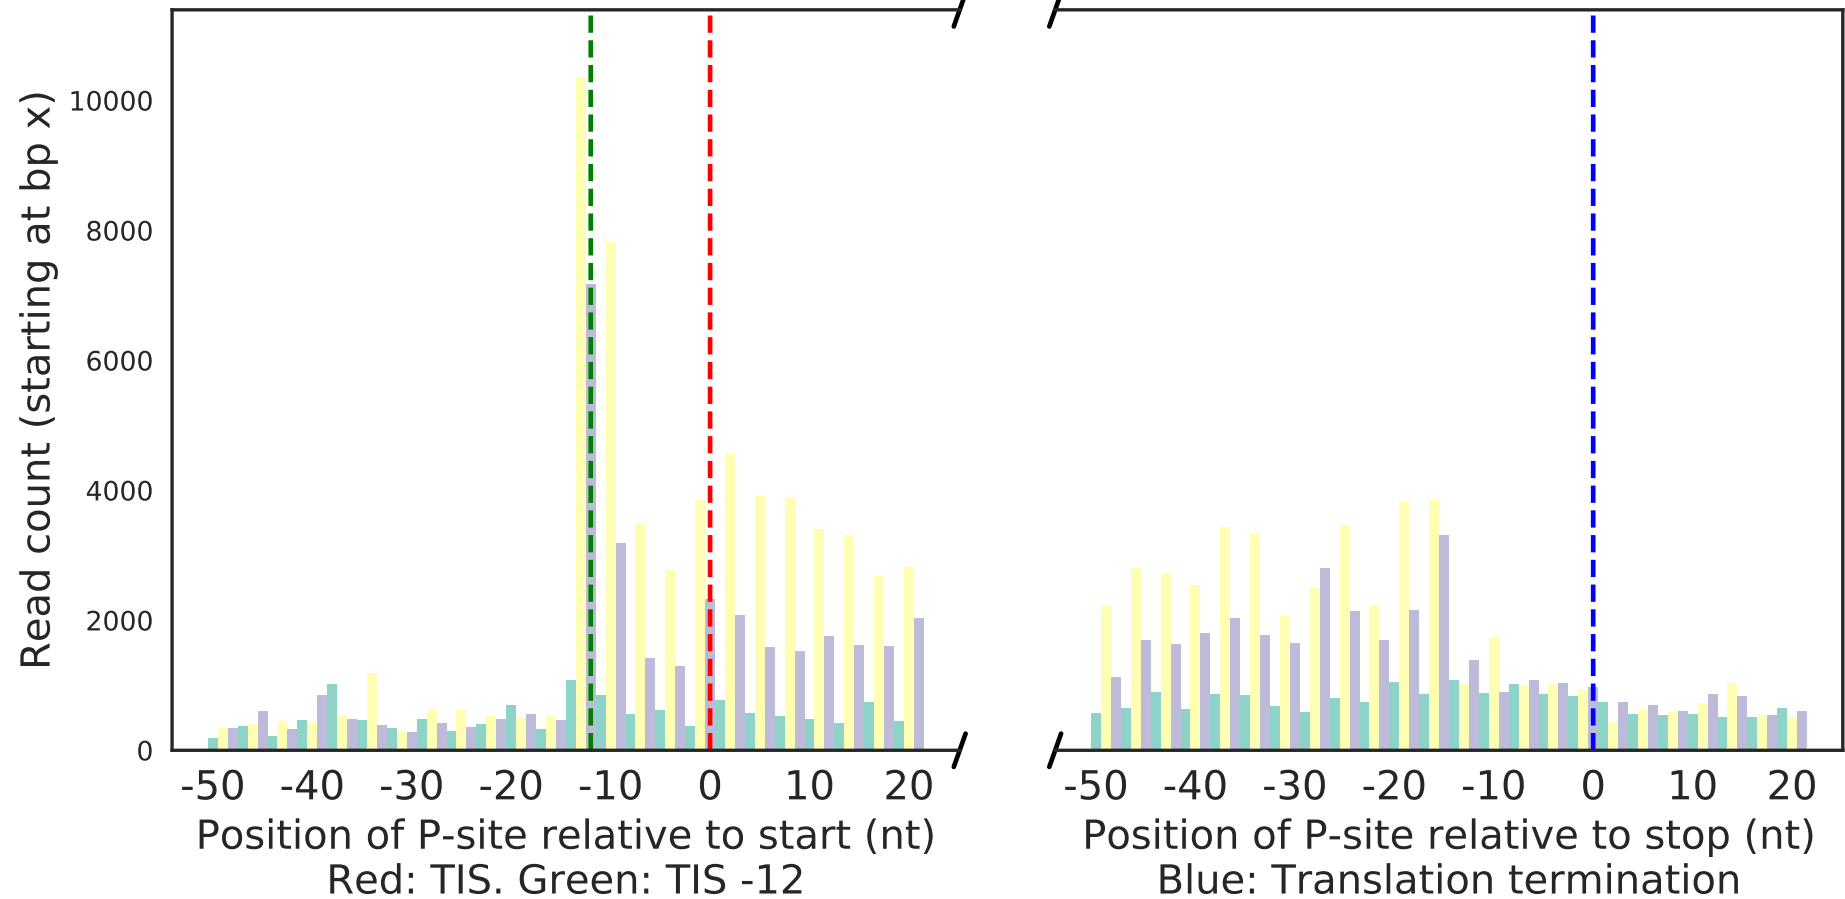

tac-2w-677. length: 33

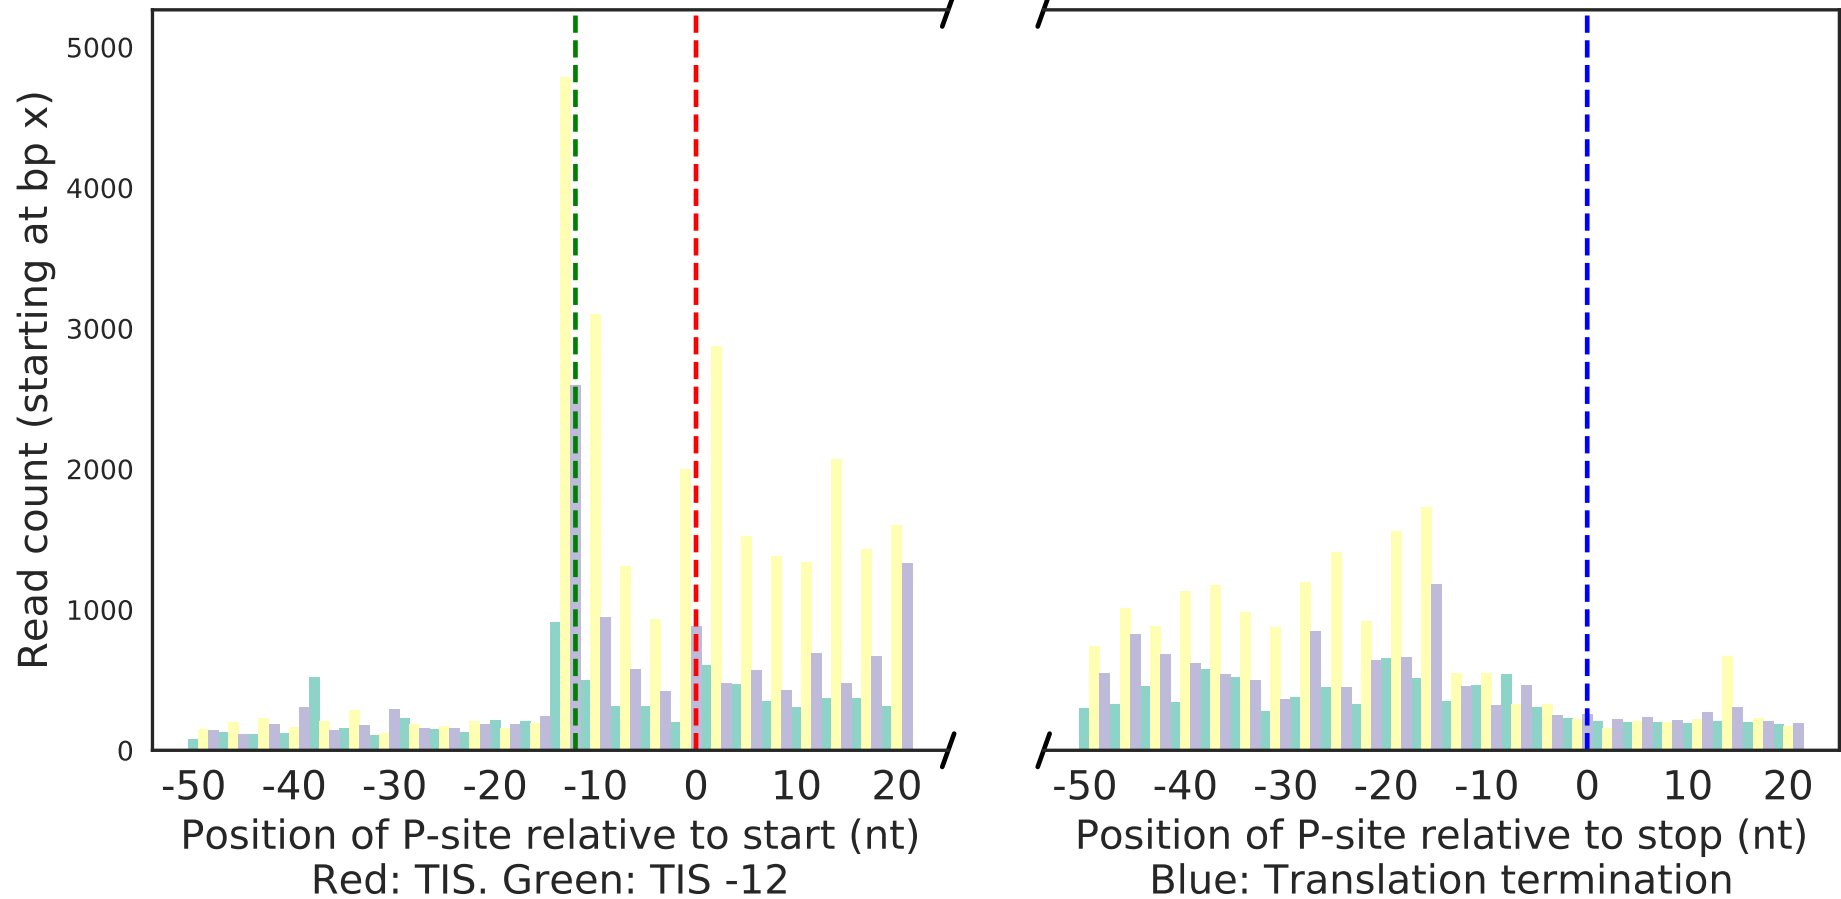

tac-2w-677. length: 34

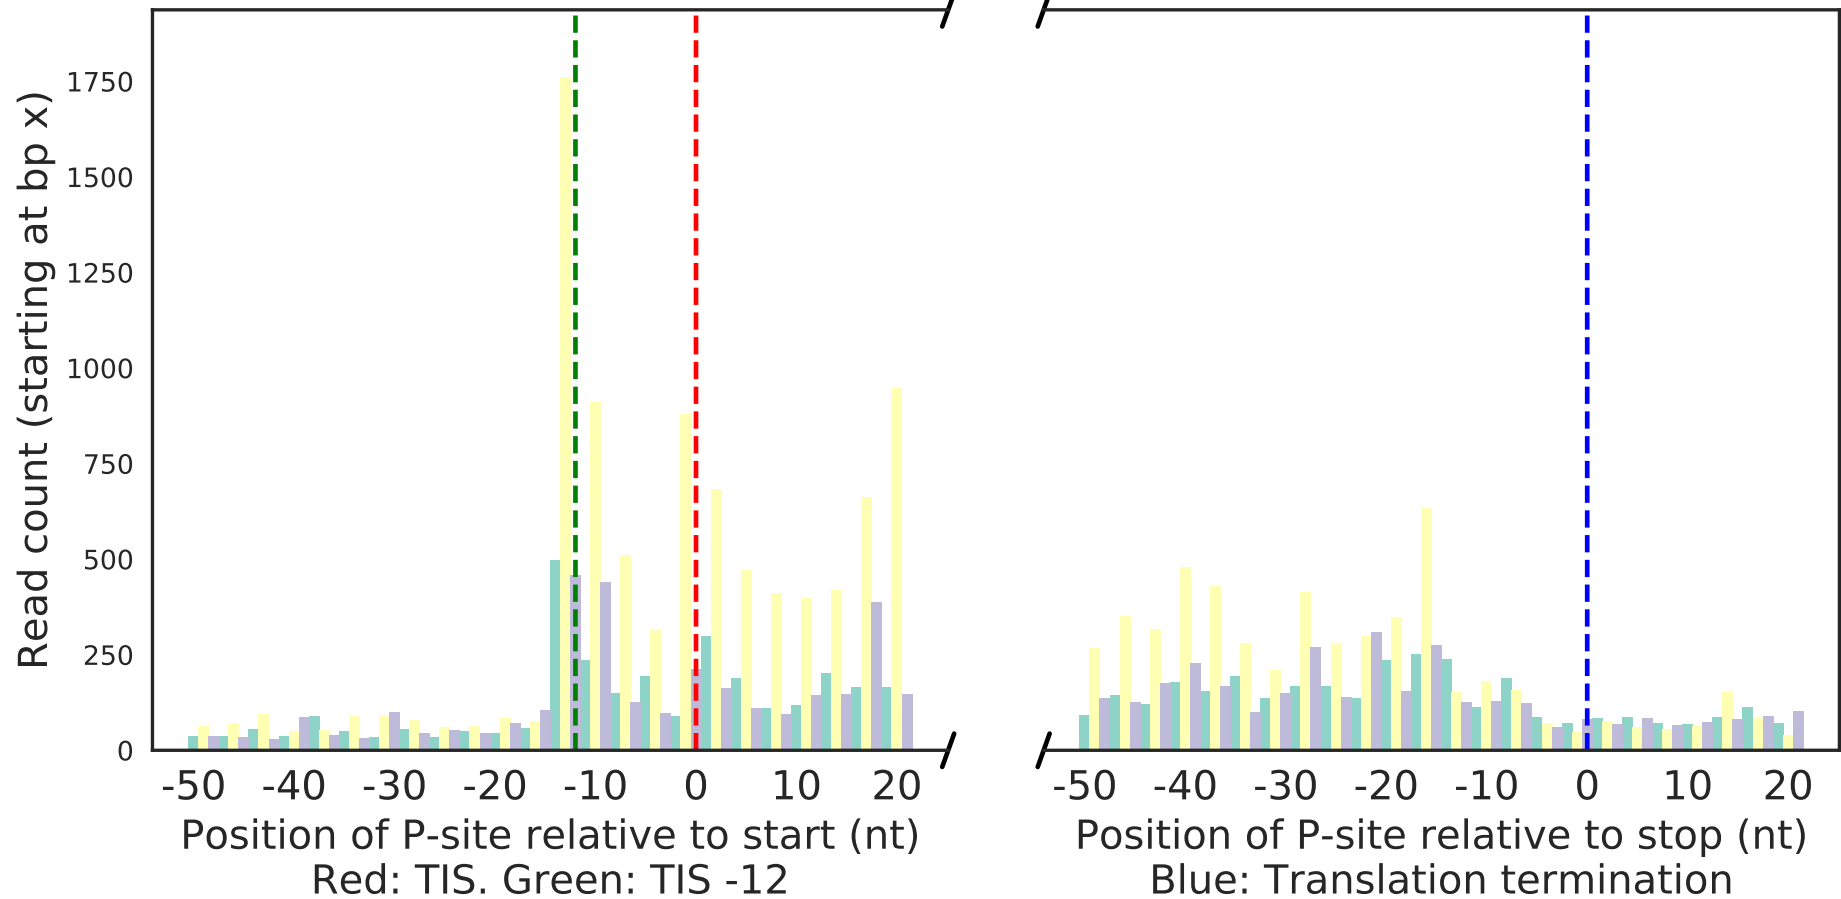

tac-2w-677. length: 35

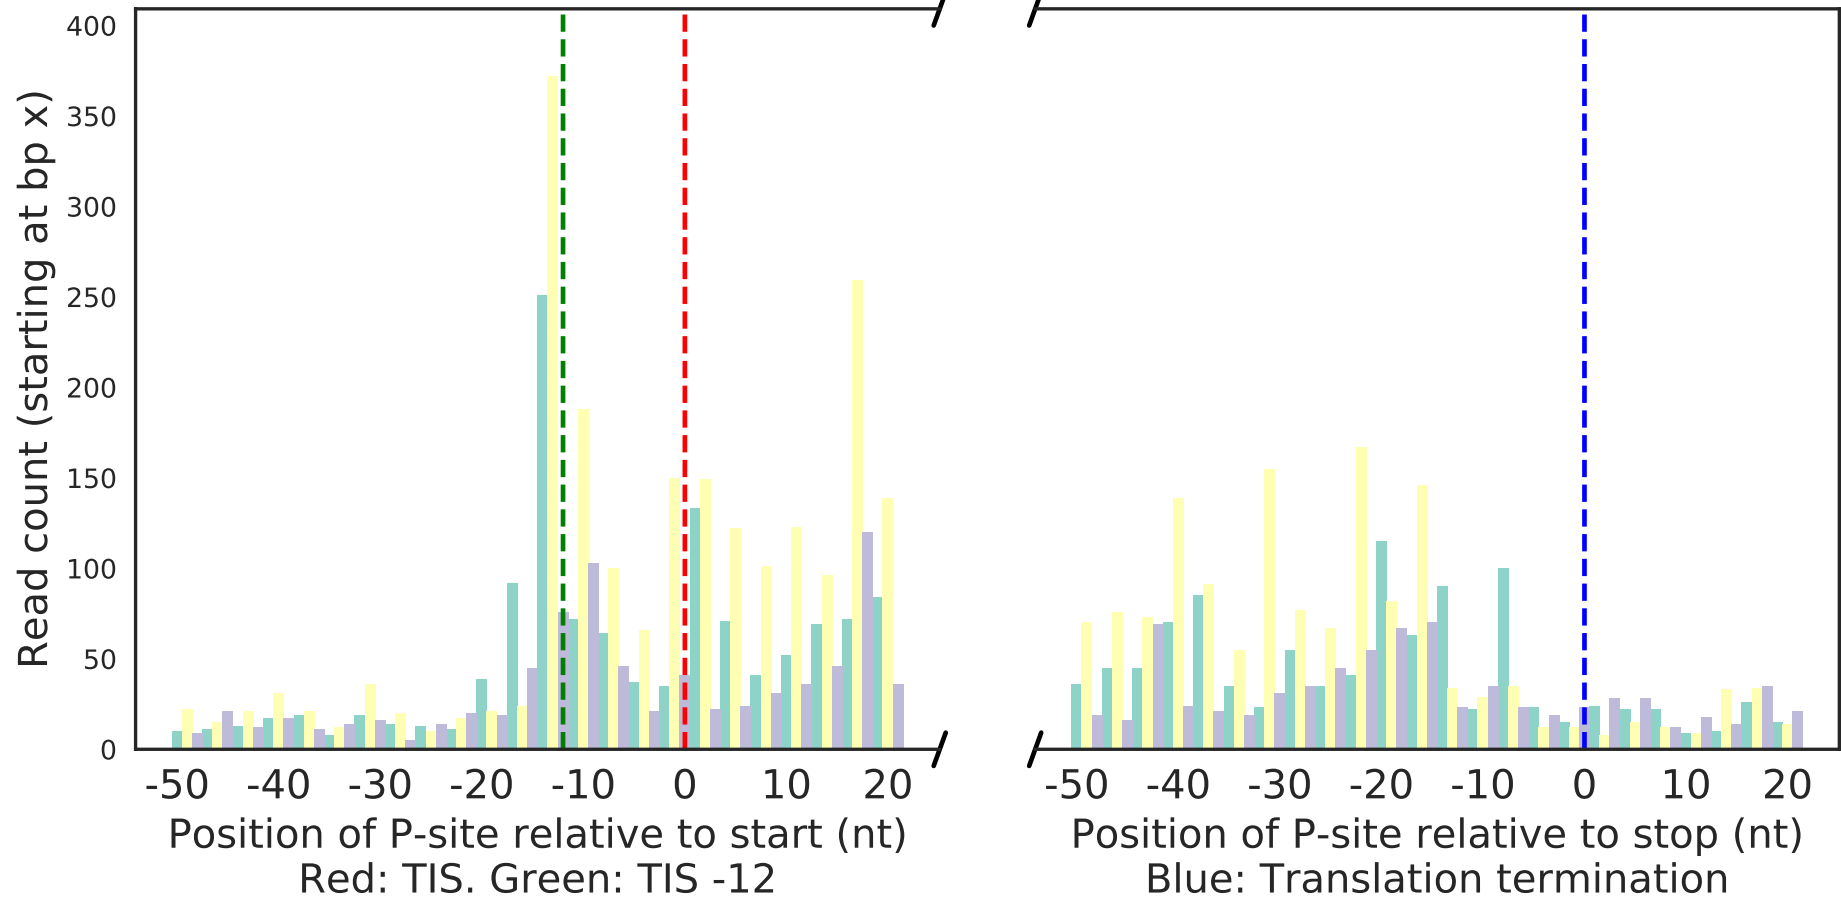

tac-2w-710. length: 19

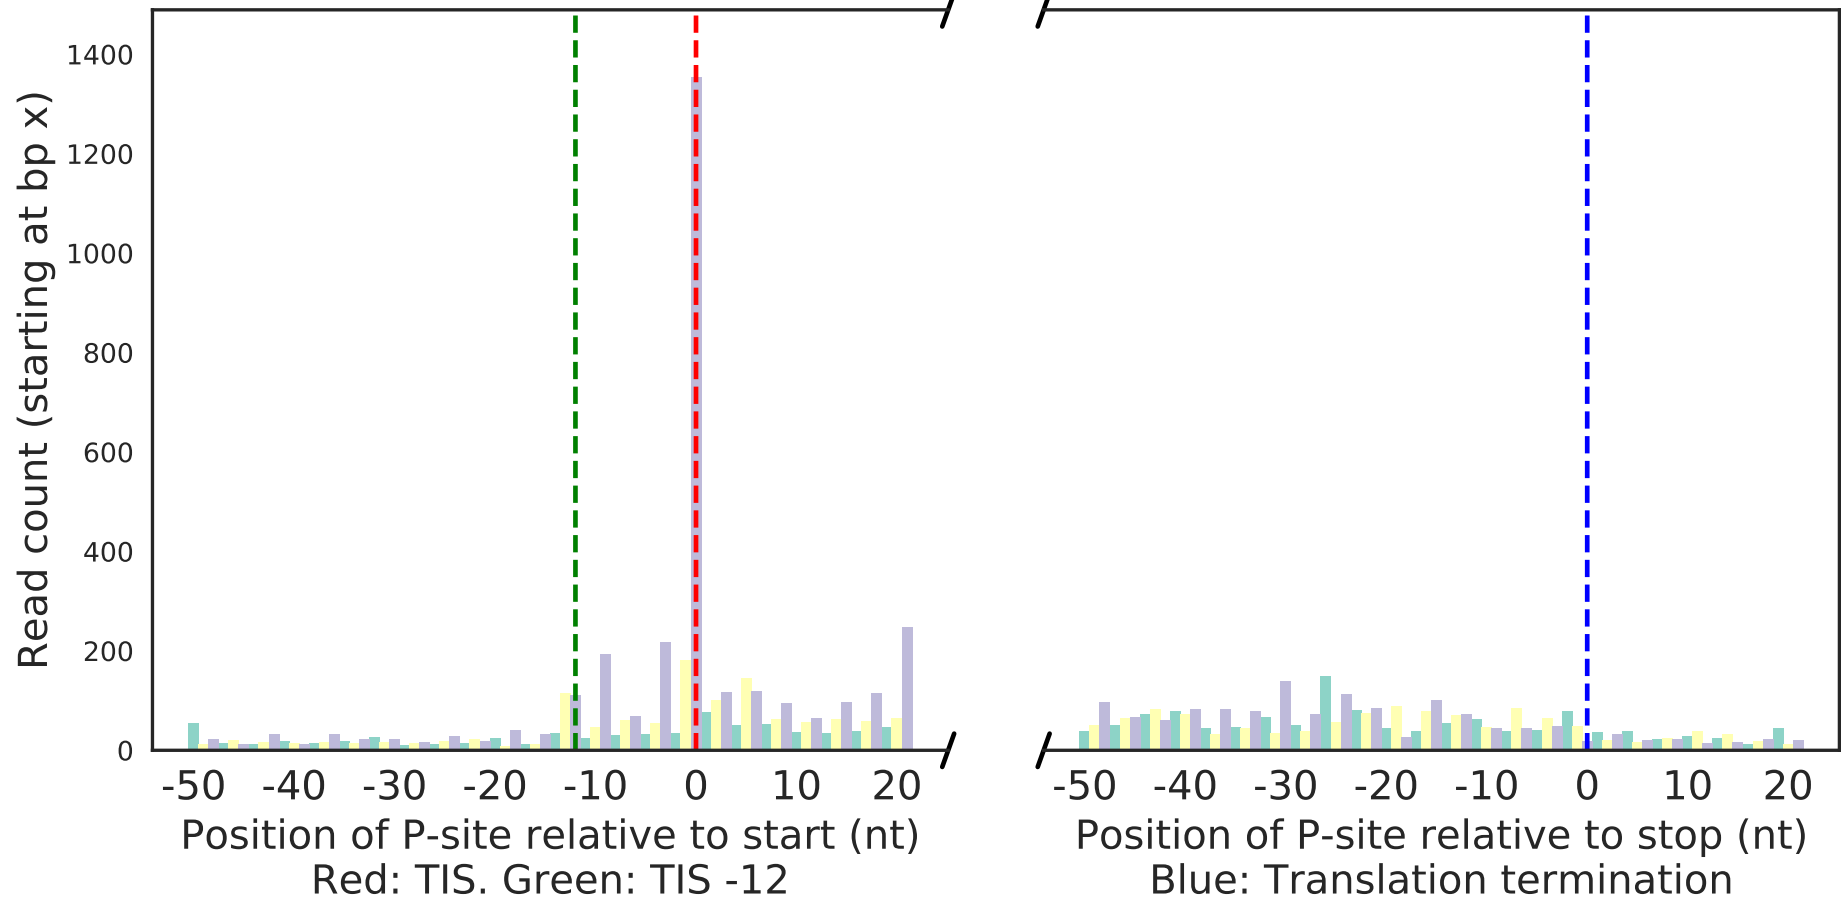

tac-2w-710. length: 22

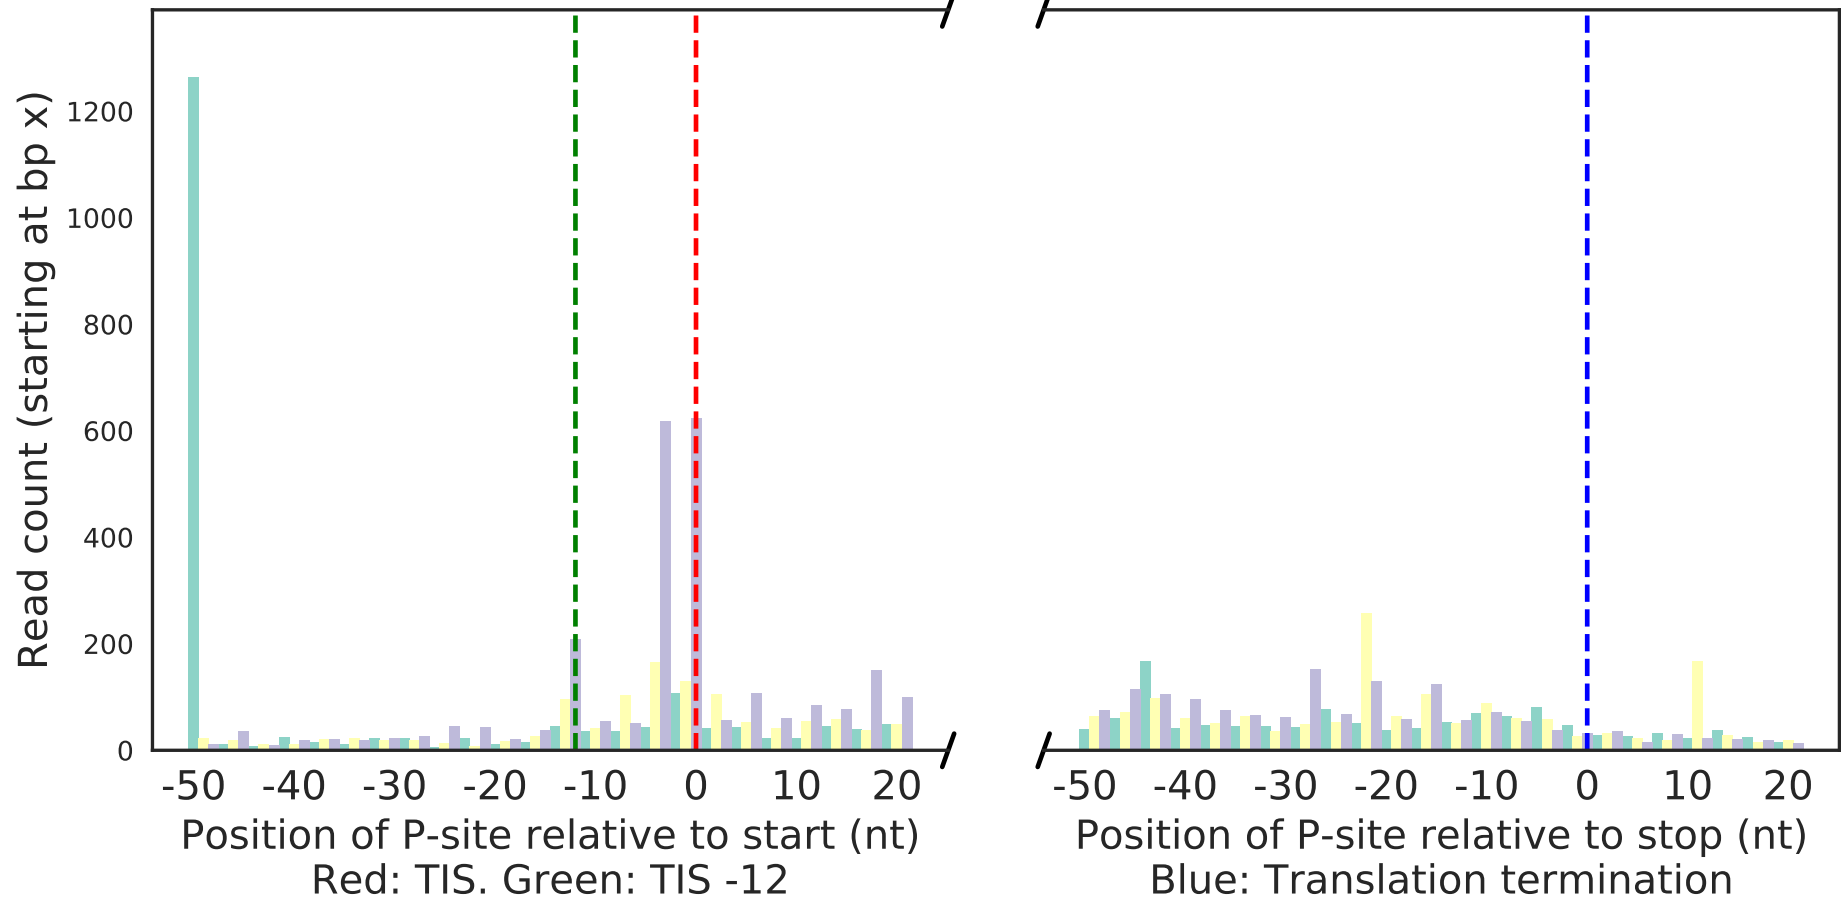

tac-2w-710. length: 29

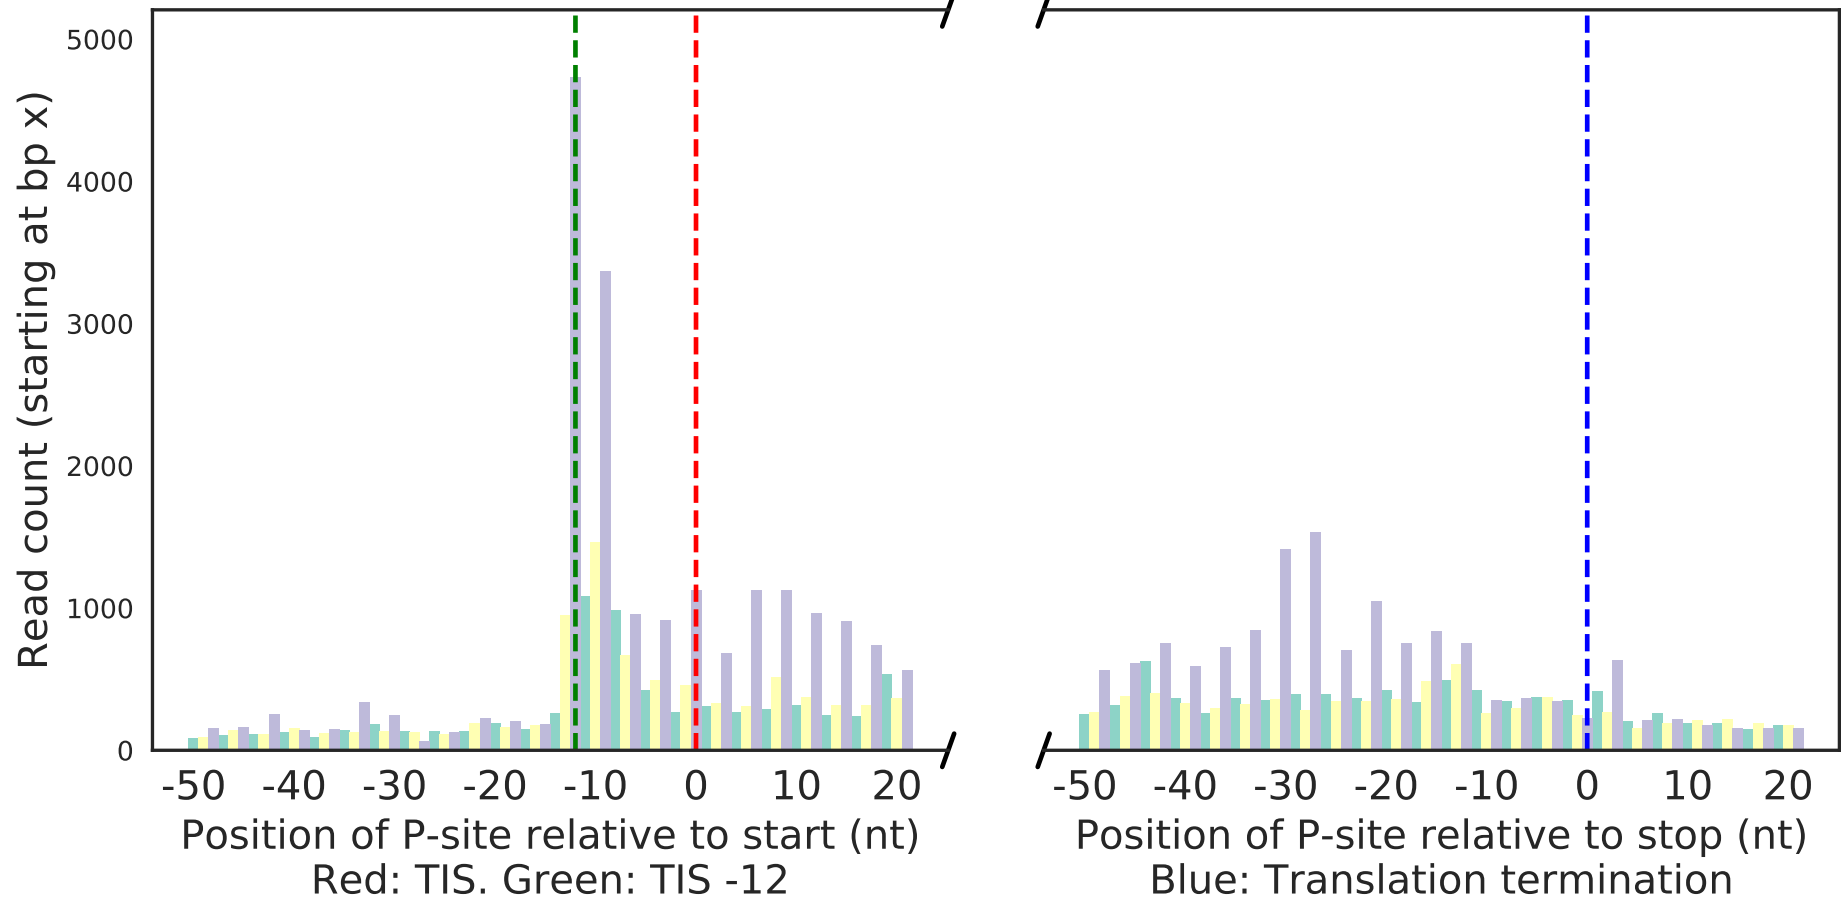

tac-2w-710. length: 30

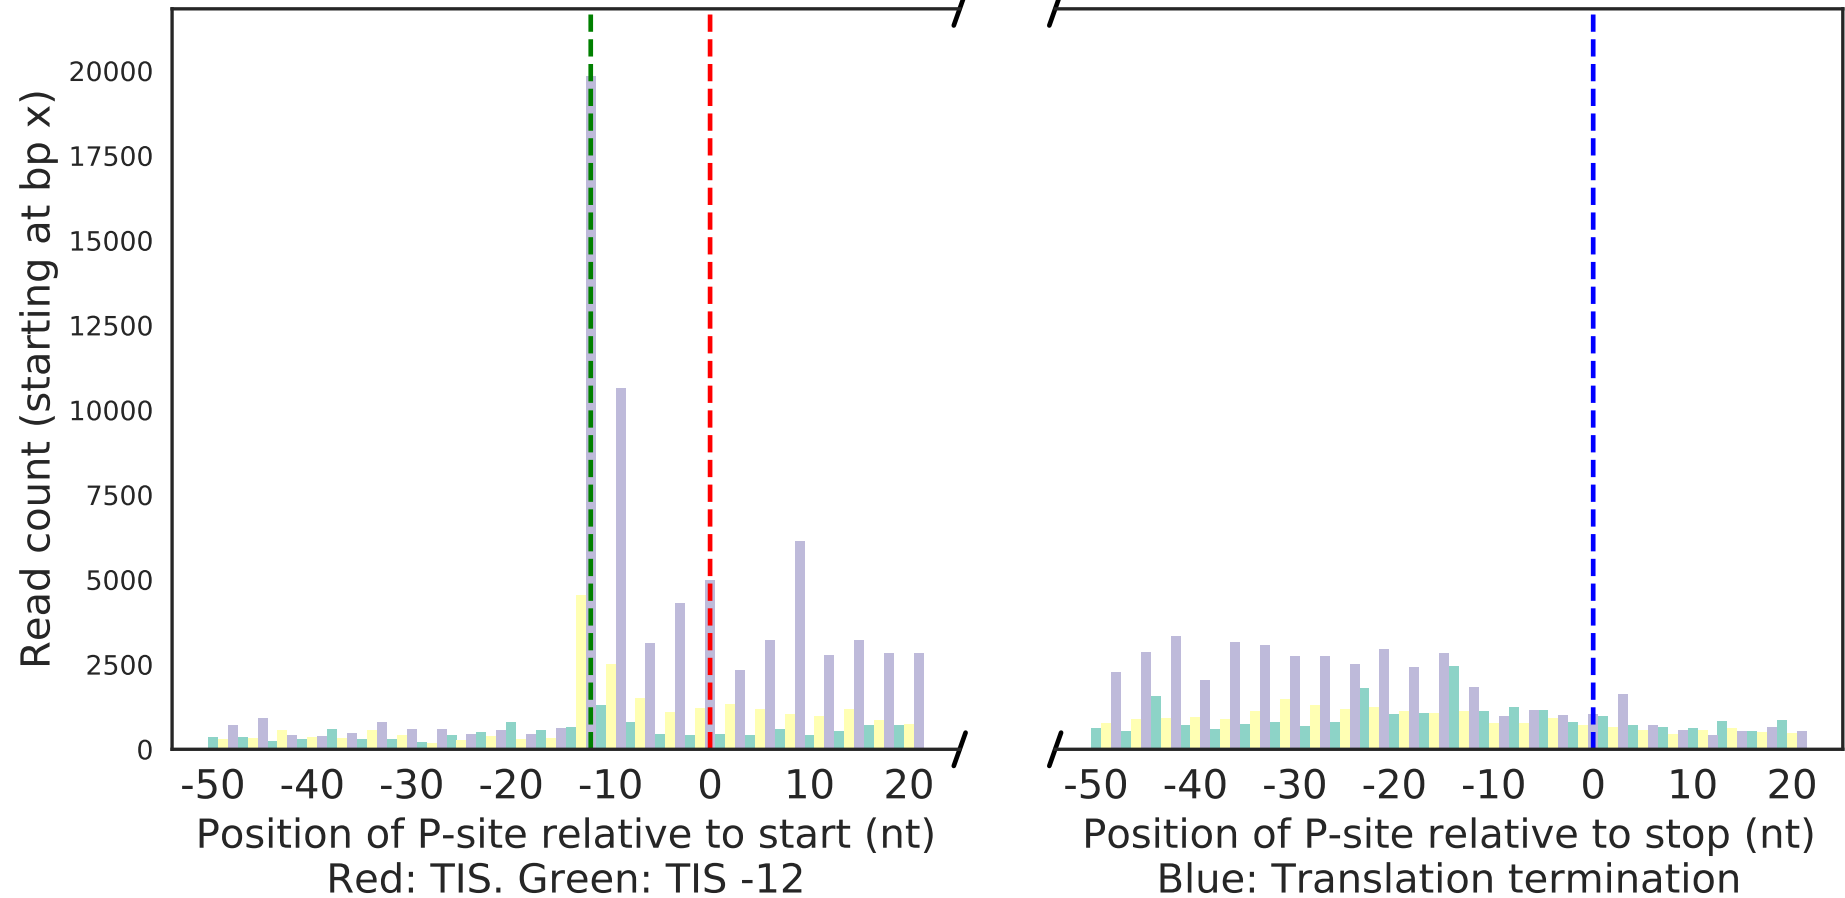



tac-2w-710. length: 33

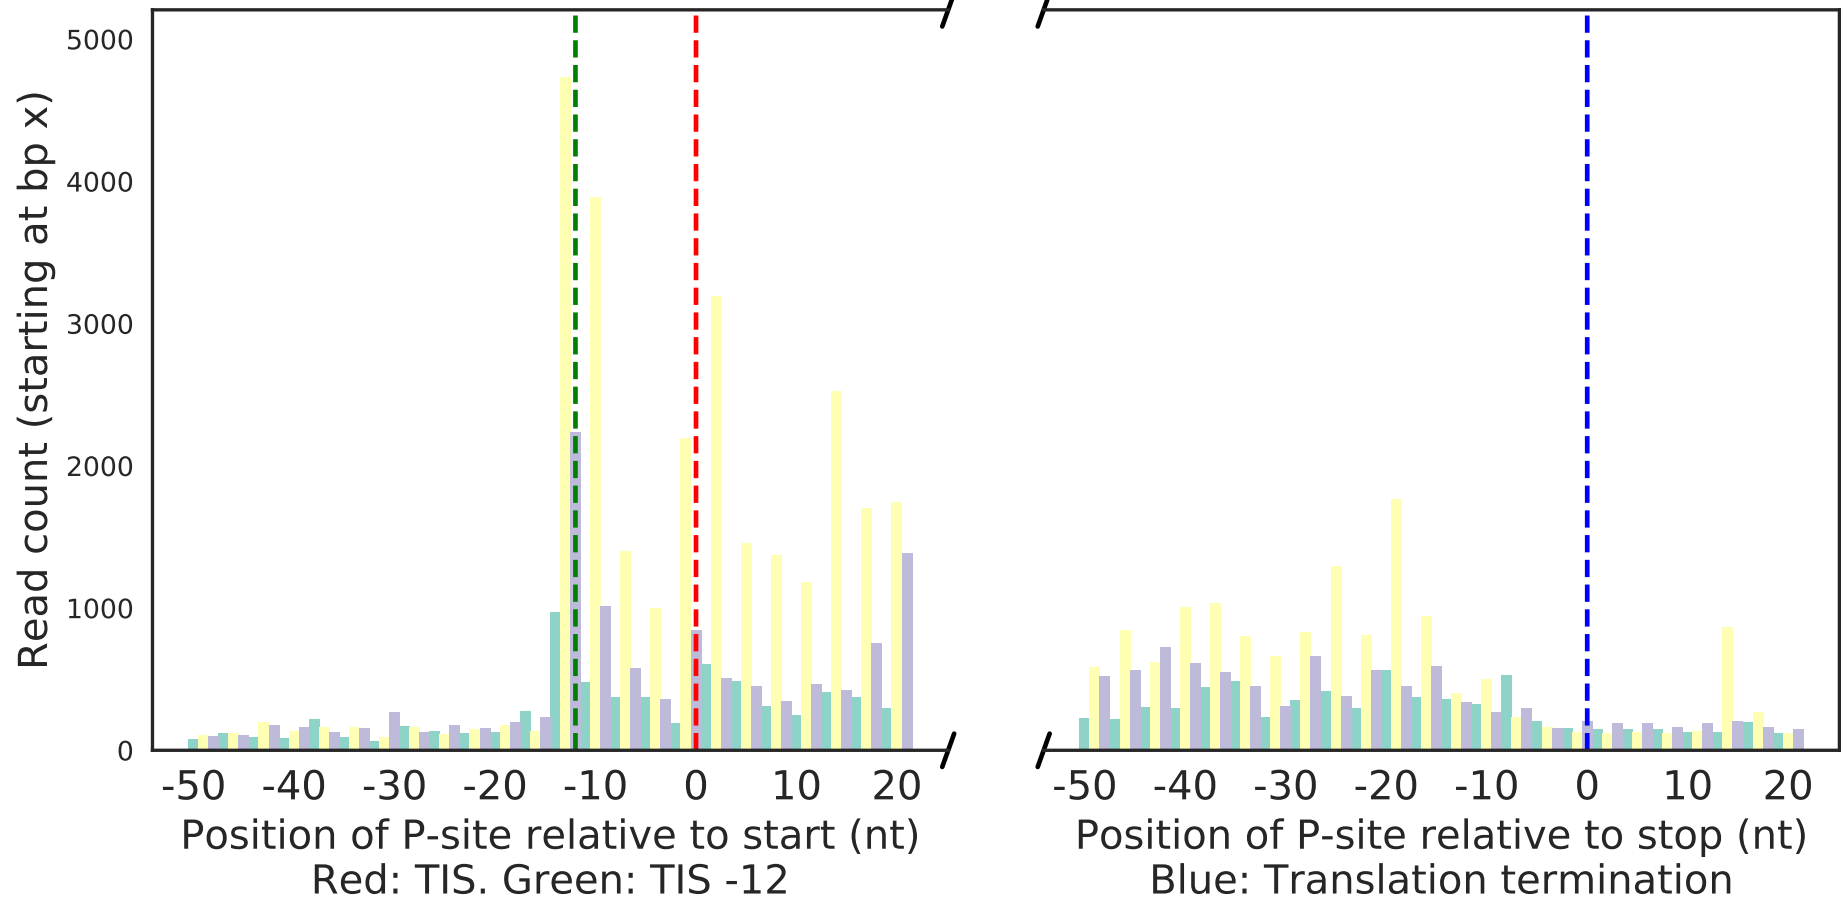

tac-2w-710. length: 34

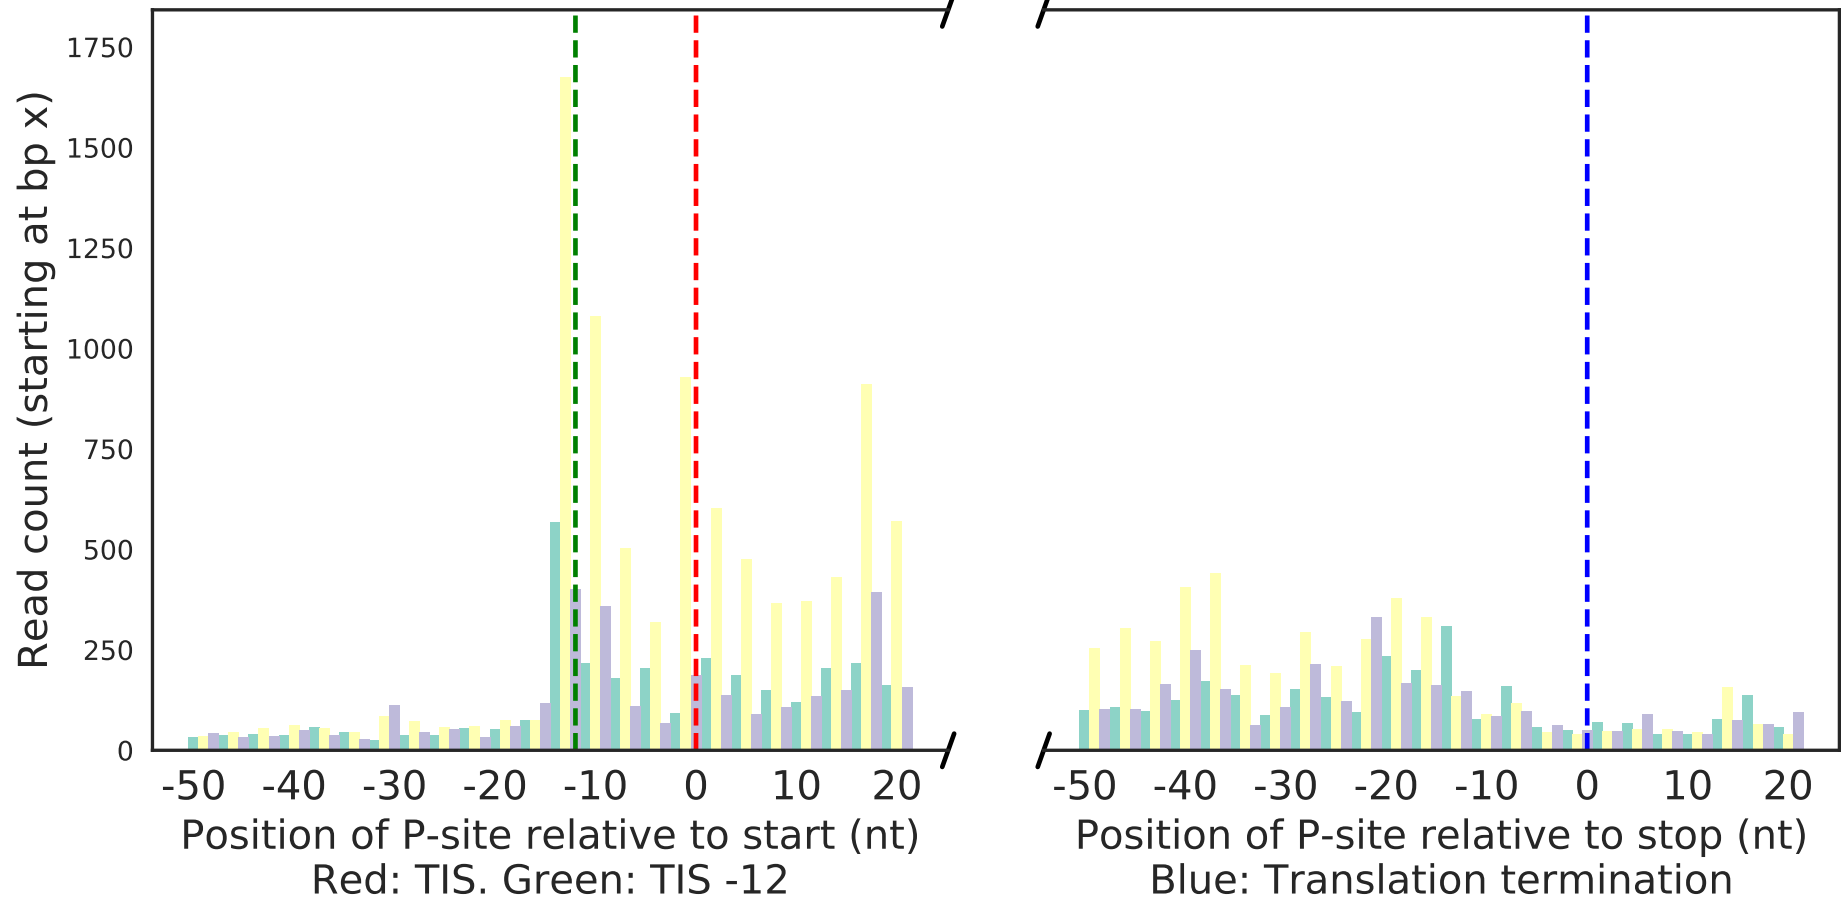

tac-2w-710. length: 35

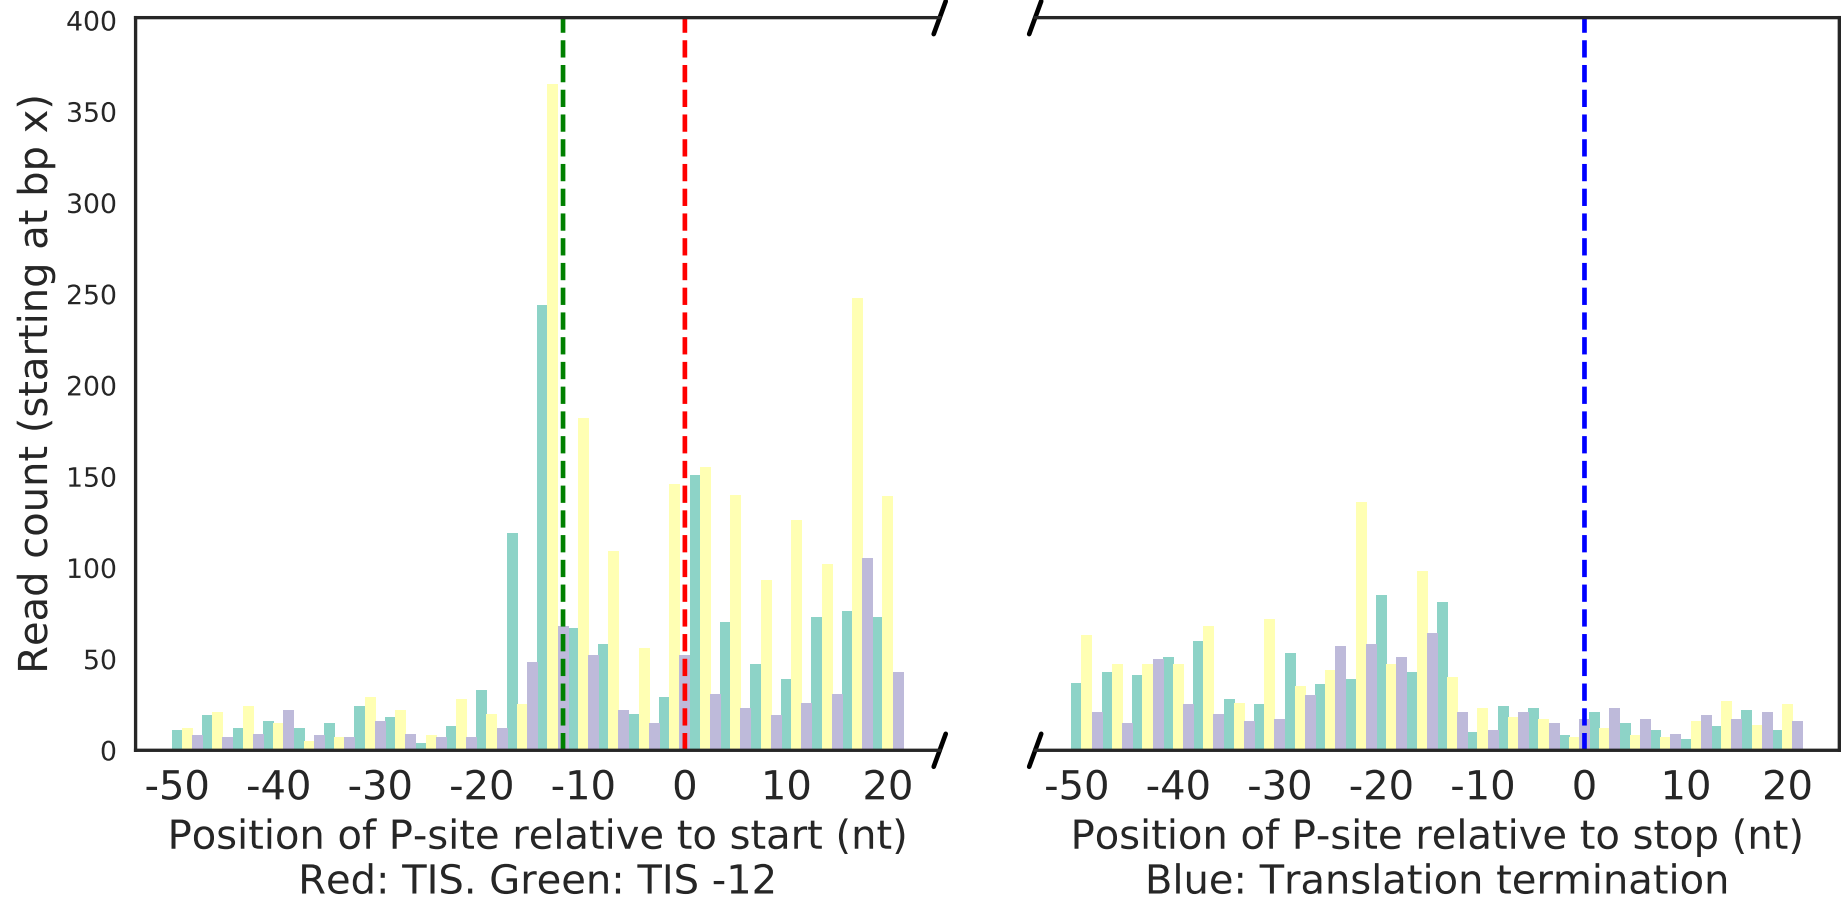

tac-2w-712. length: 28

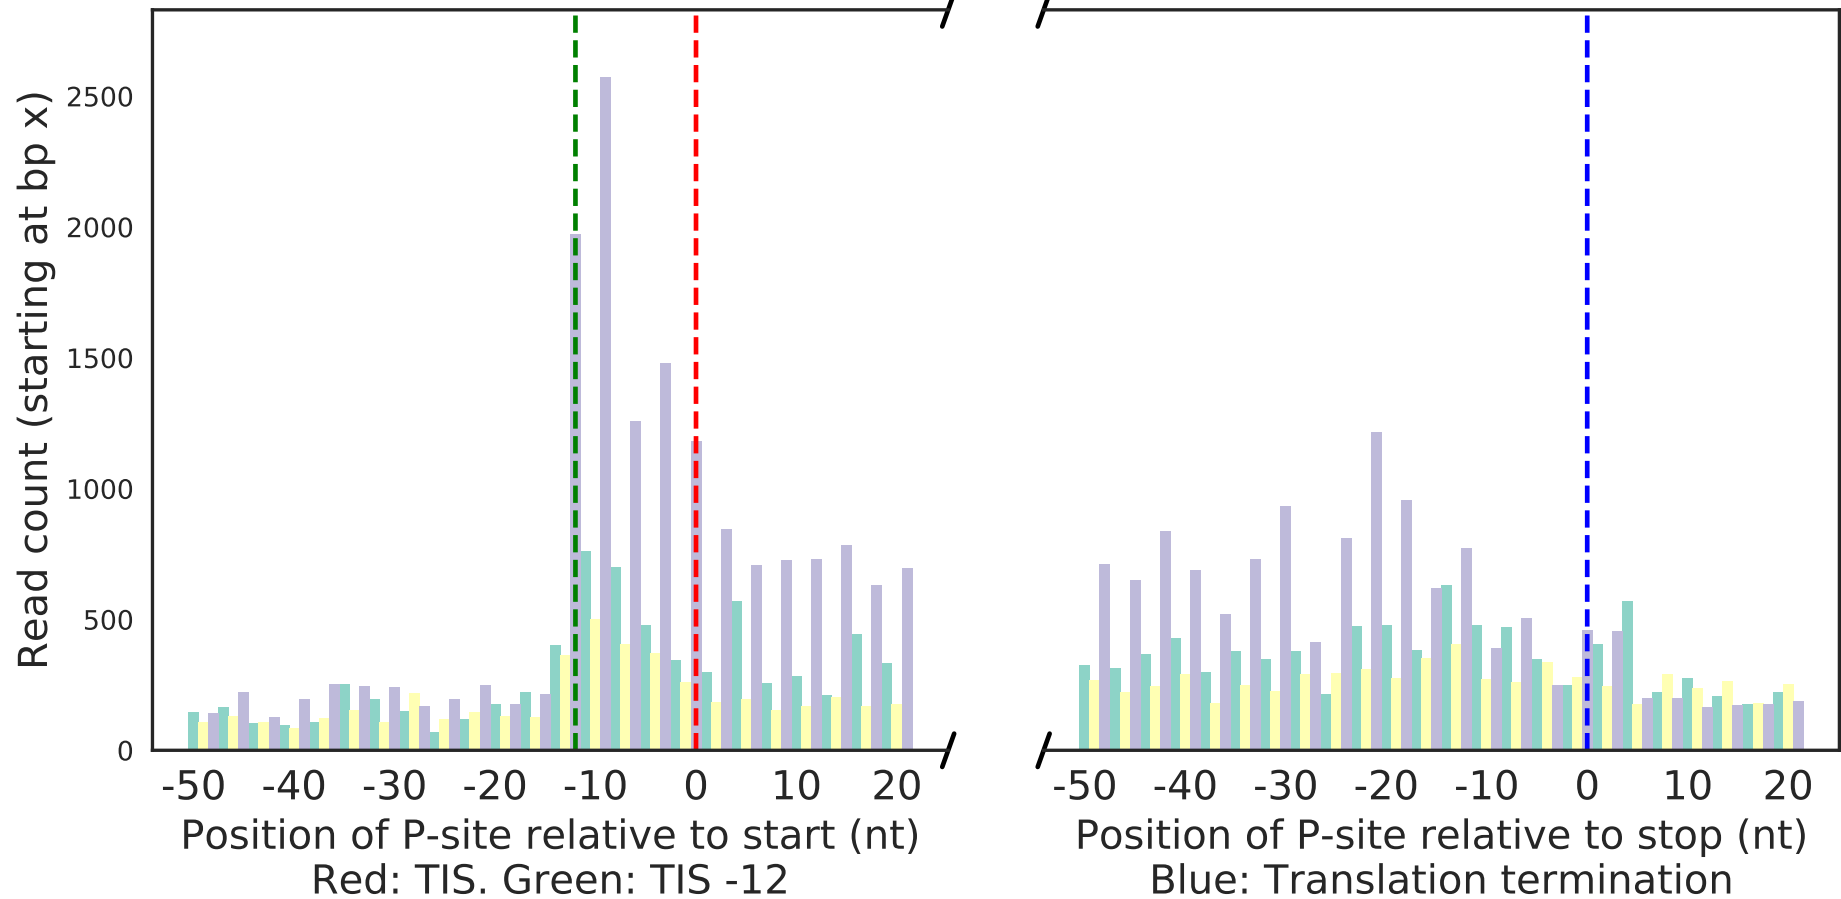

tac-2w-712. length: 29

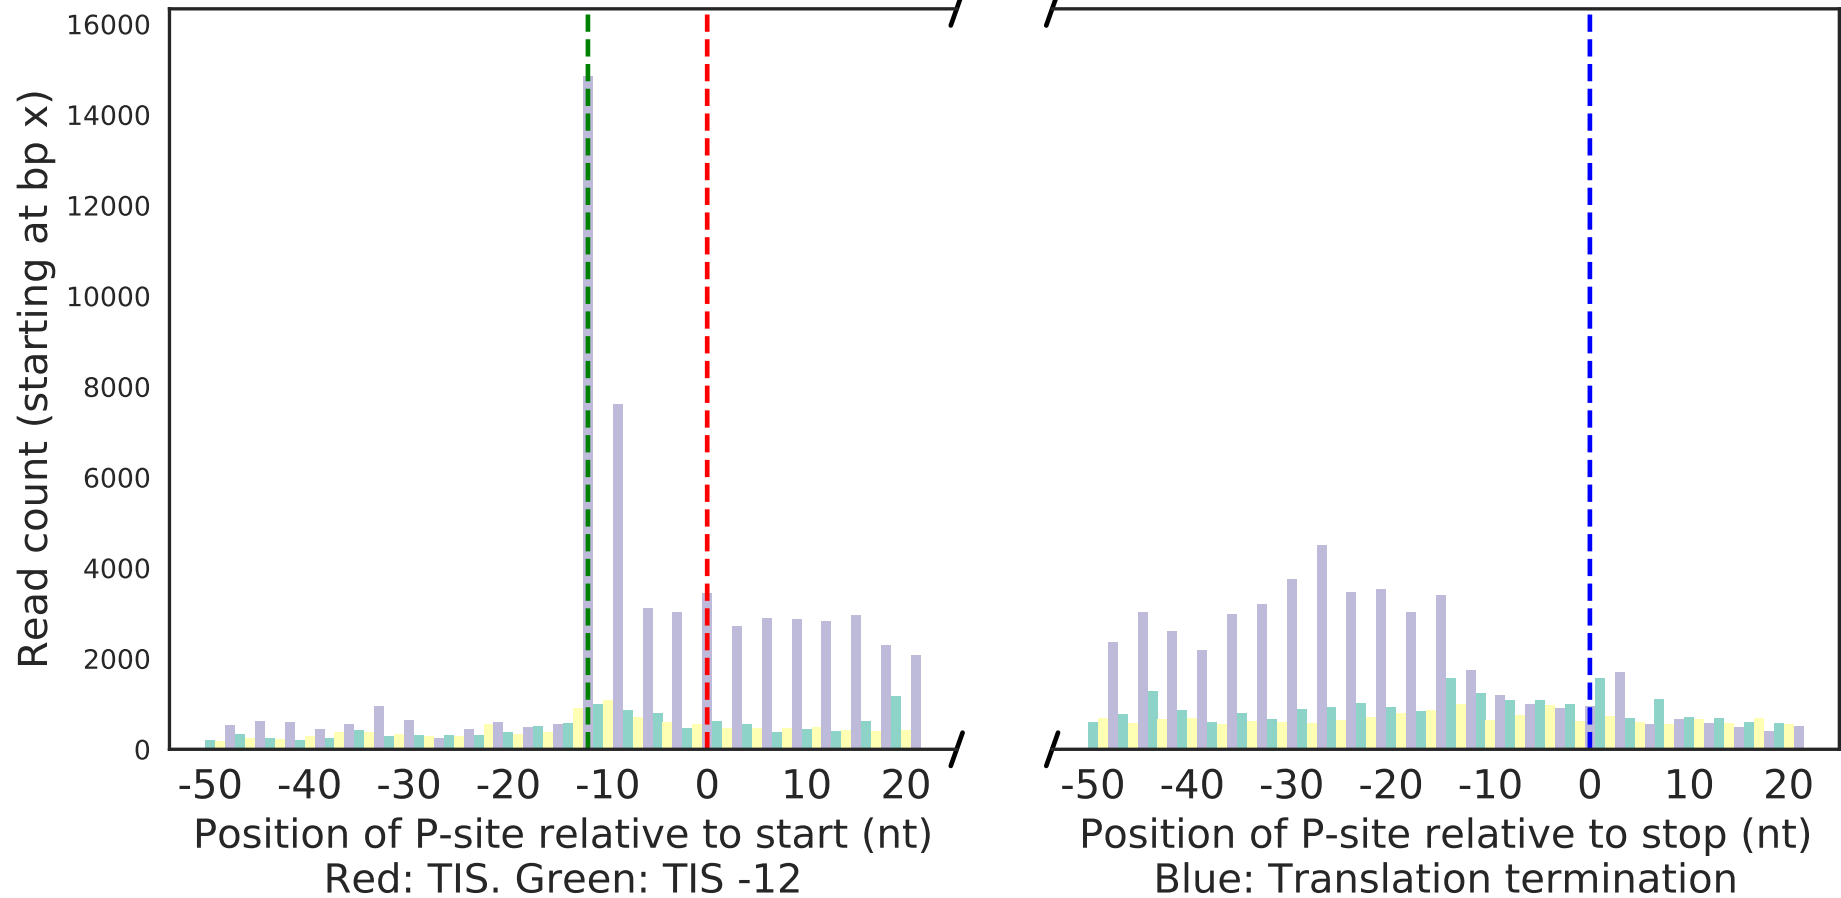

tac-2w-712. length: 30

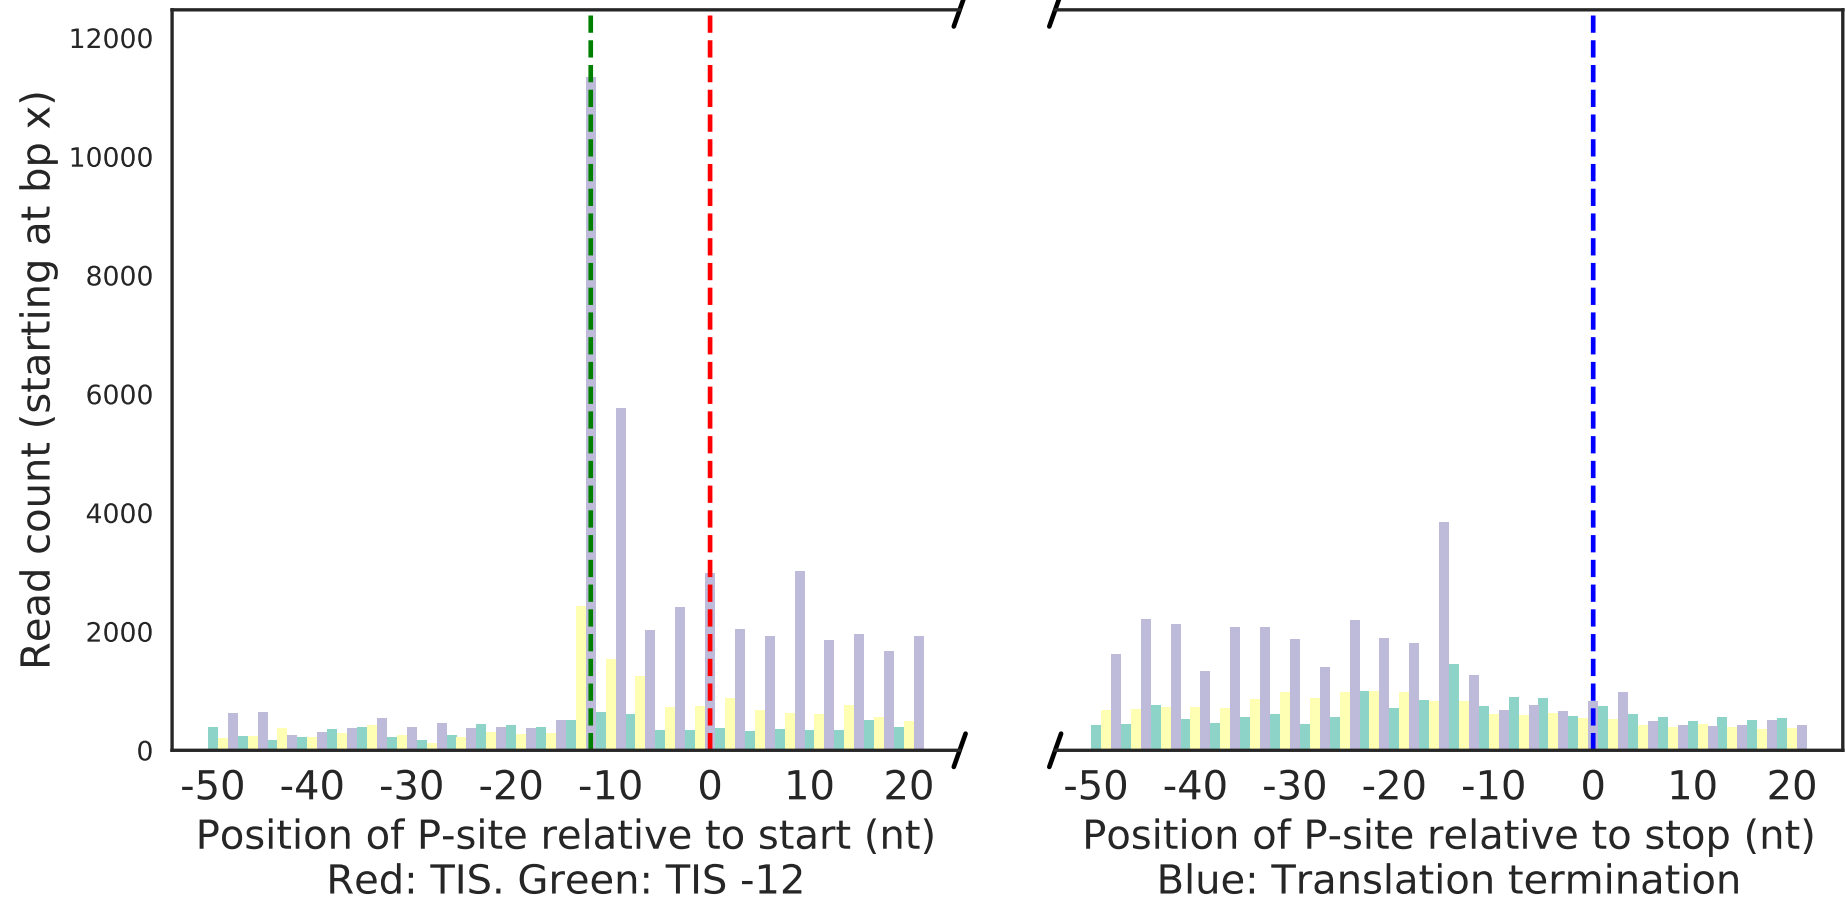

tac-2w-712. length: 32

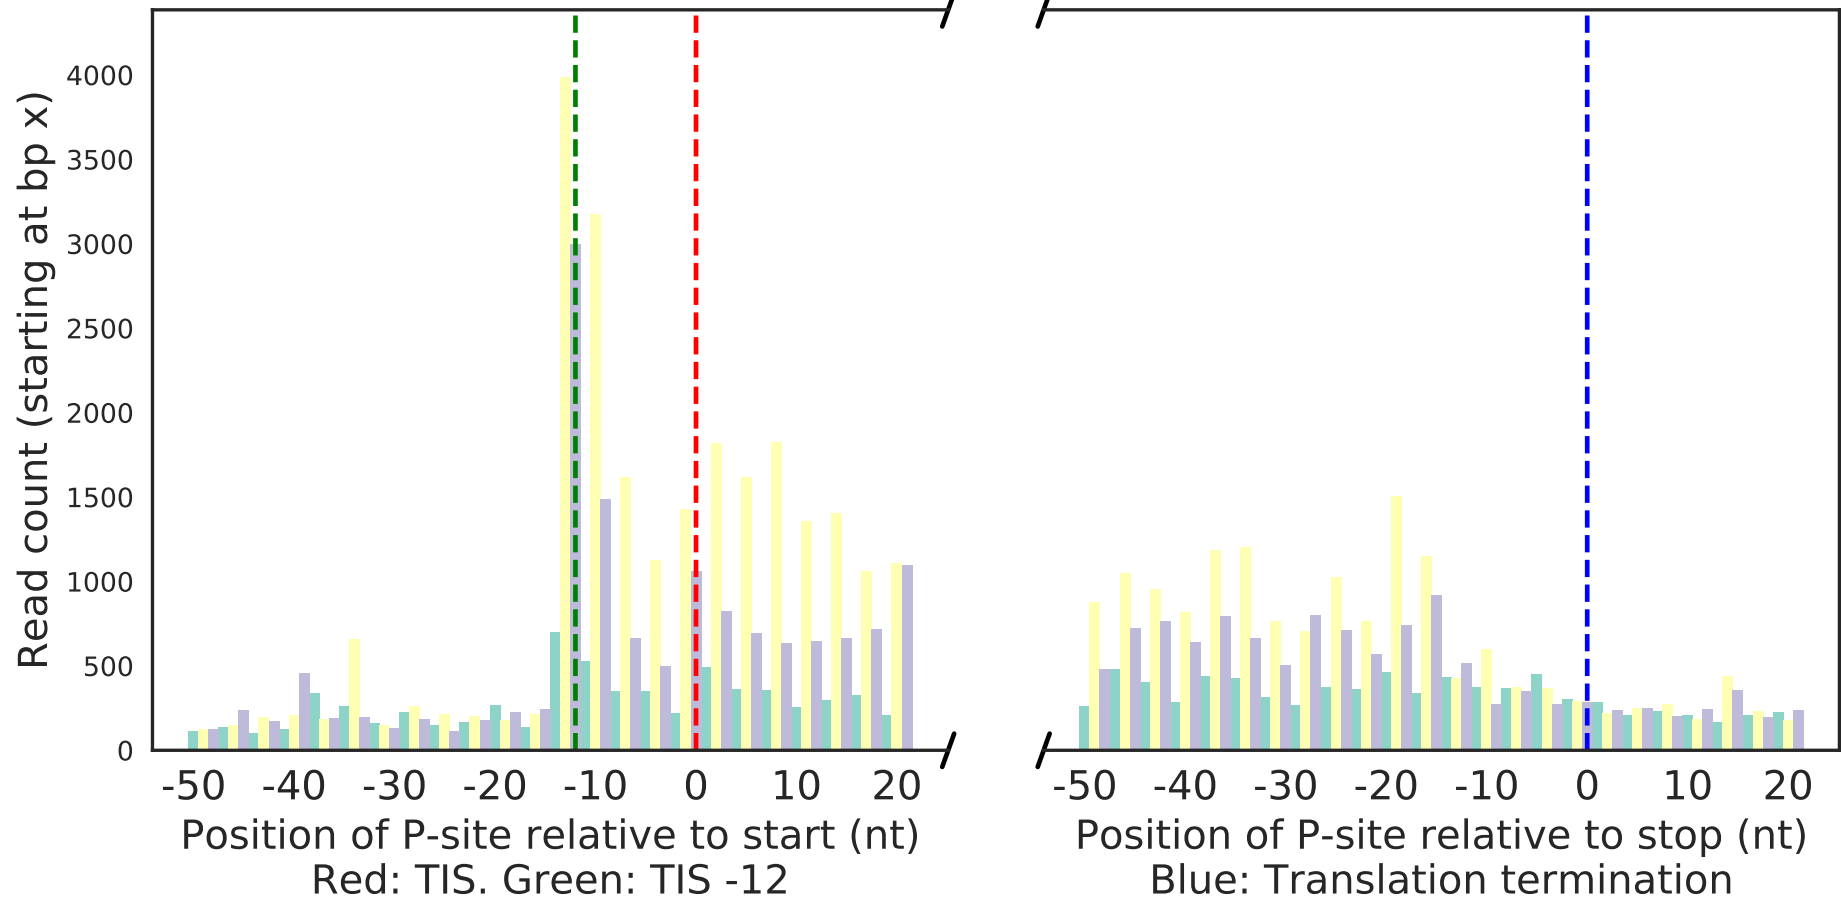

tac-2w-712. length: 33

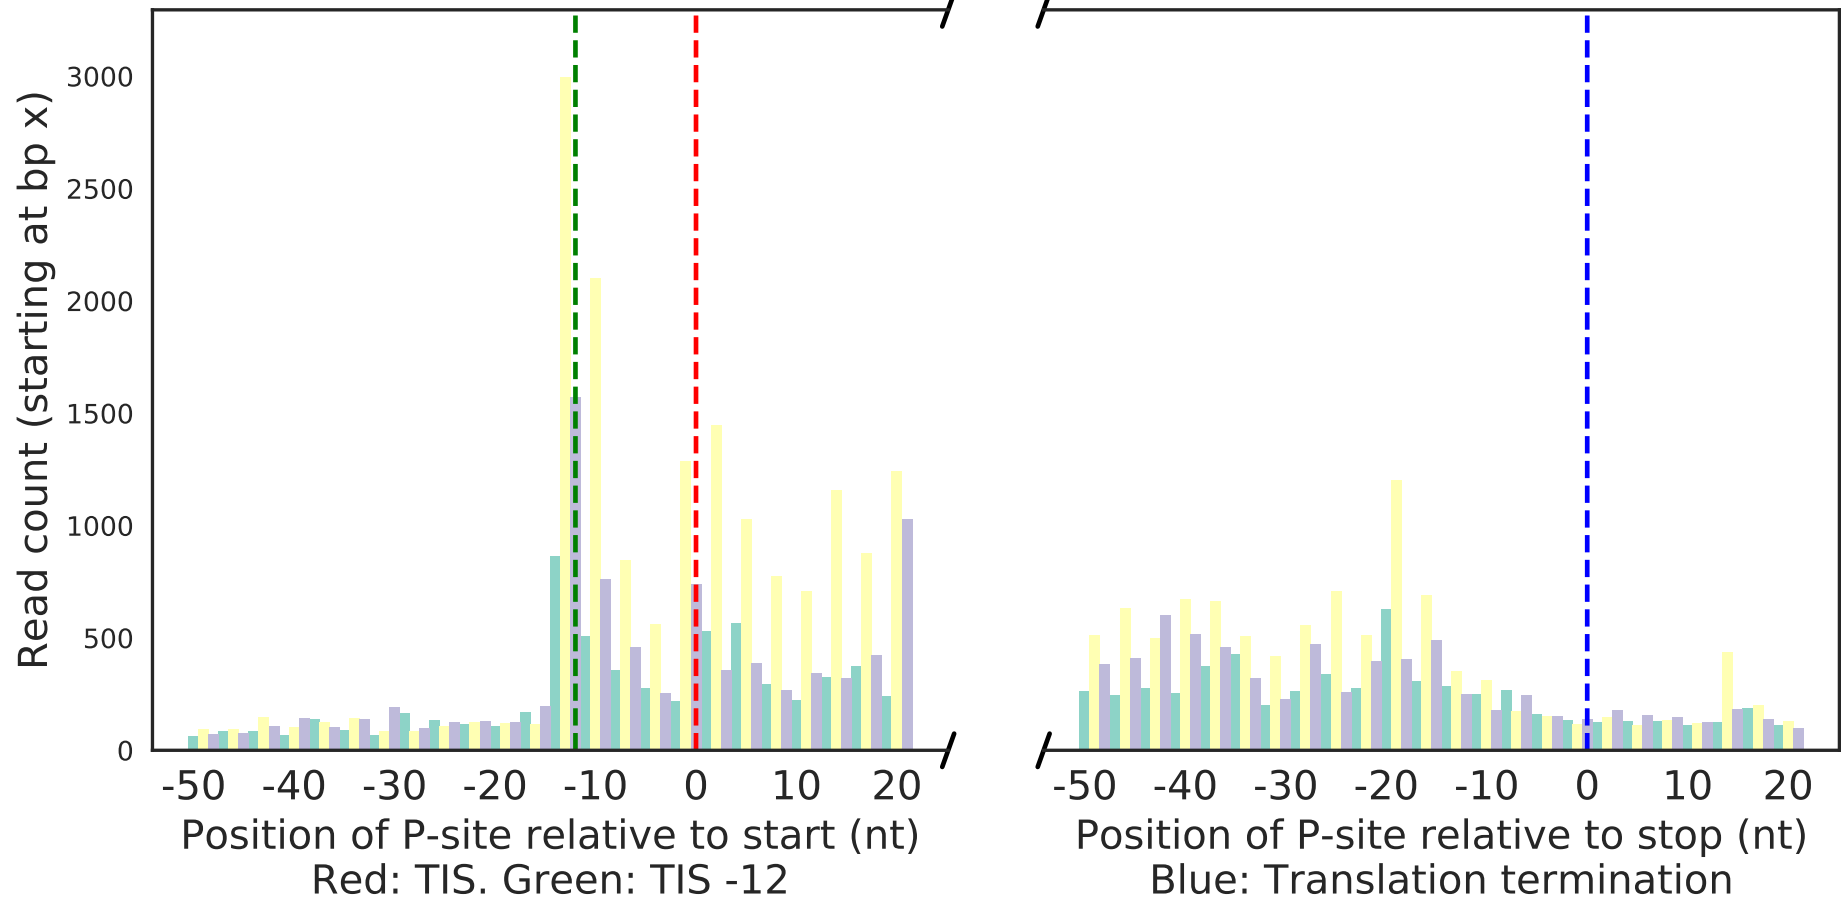



tac-2w-712. length: 34

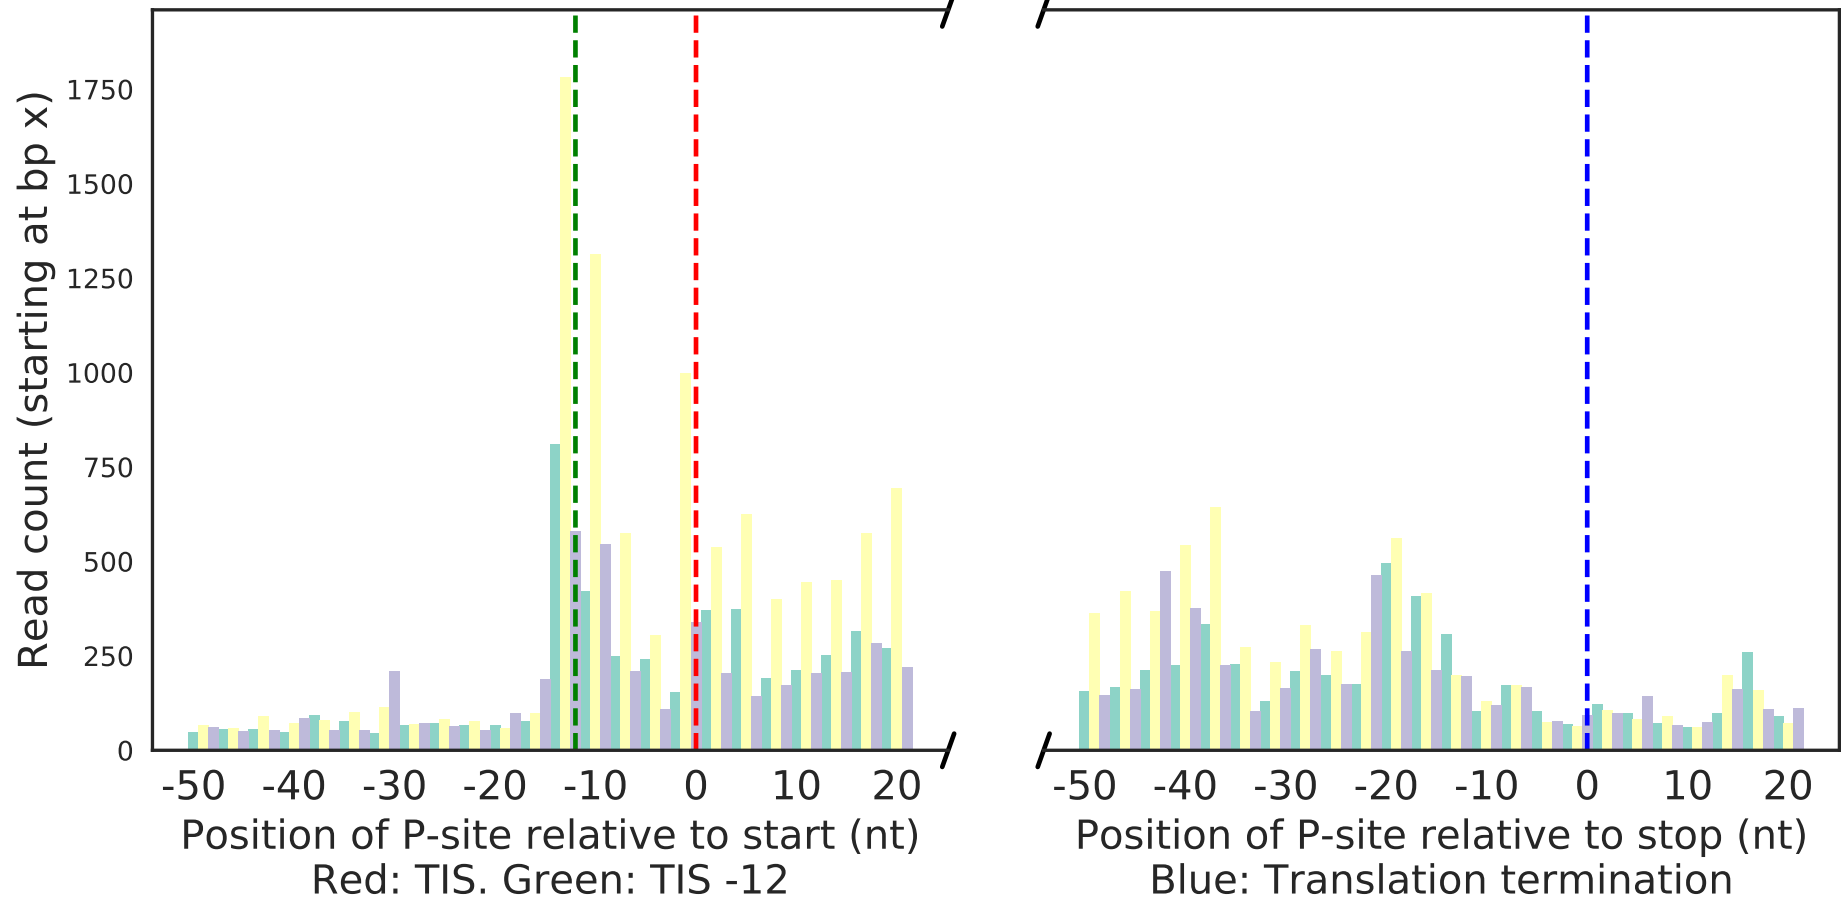

LV1S4. length: 29

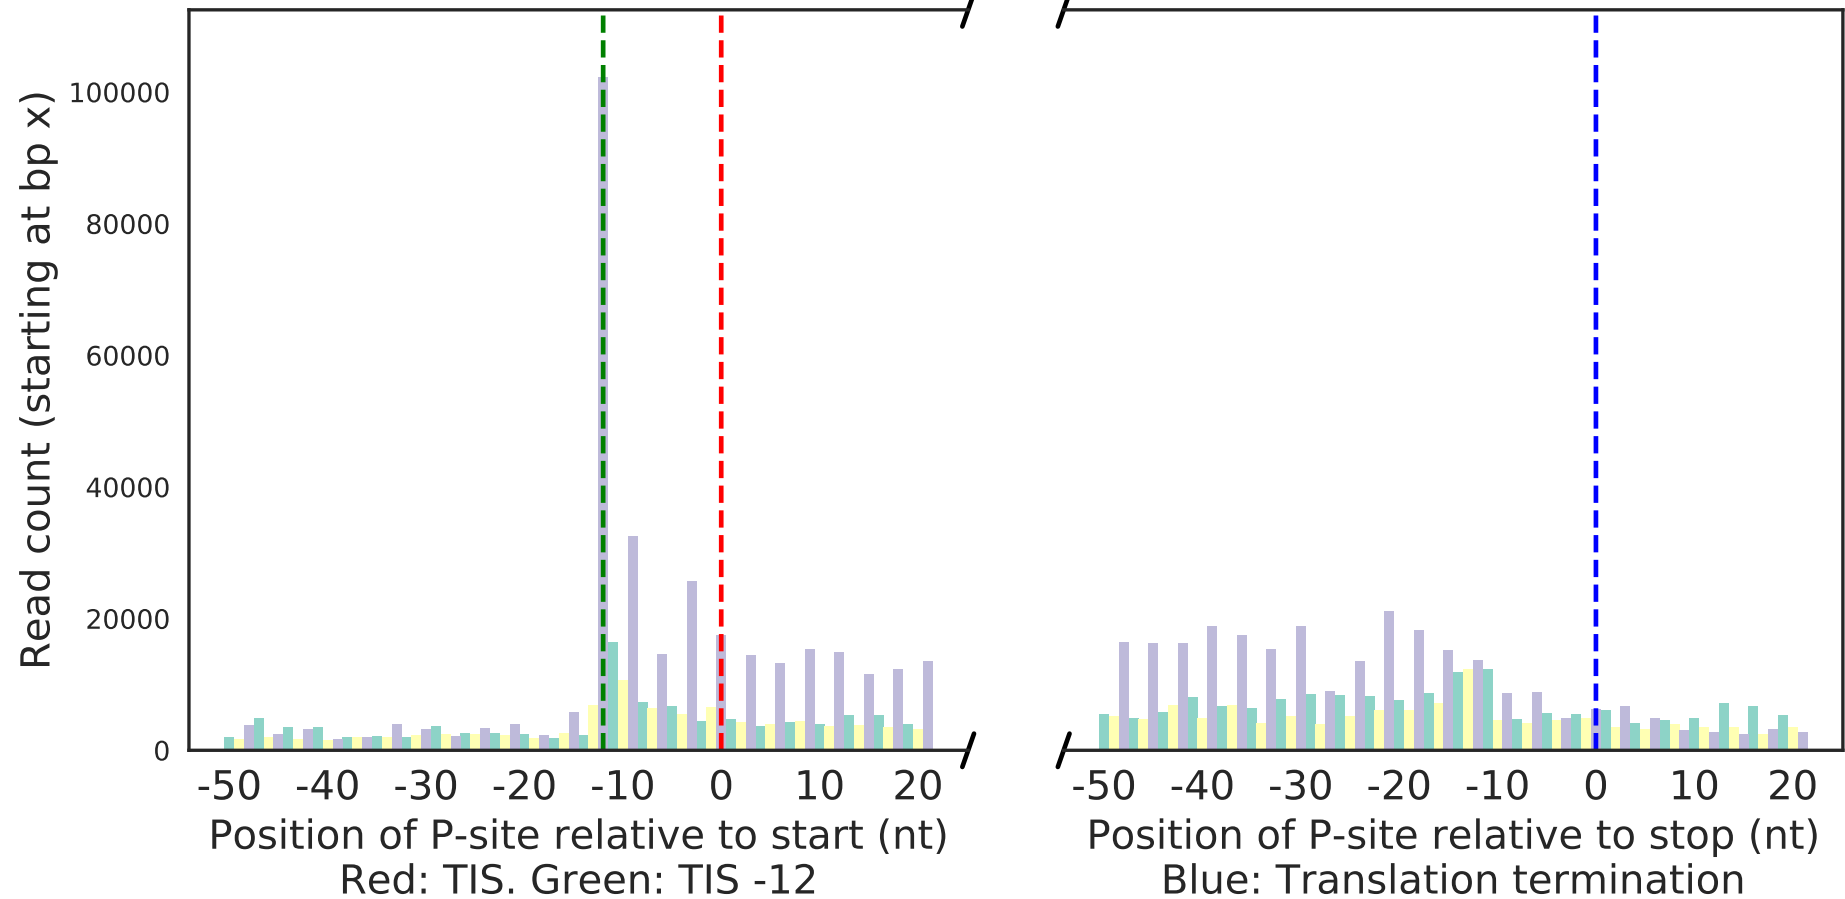

LV1S4. length: 30

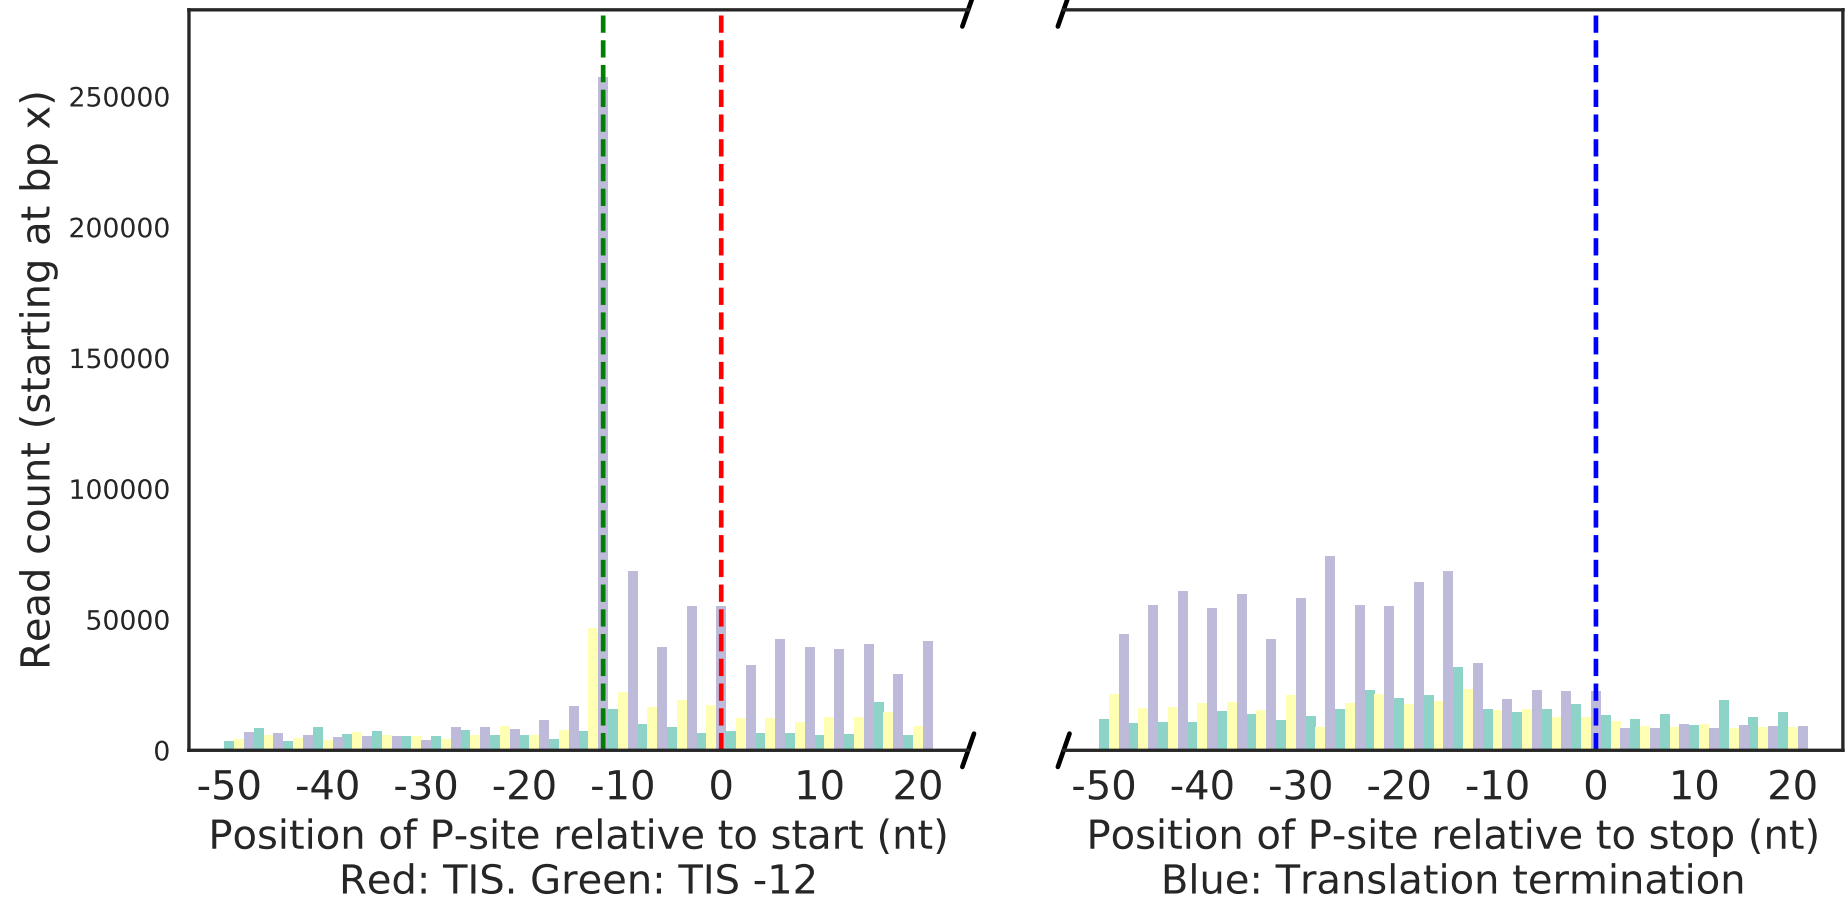

LV1S4. length: 31

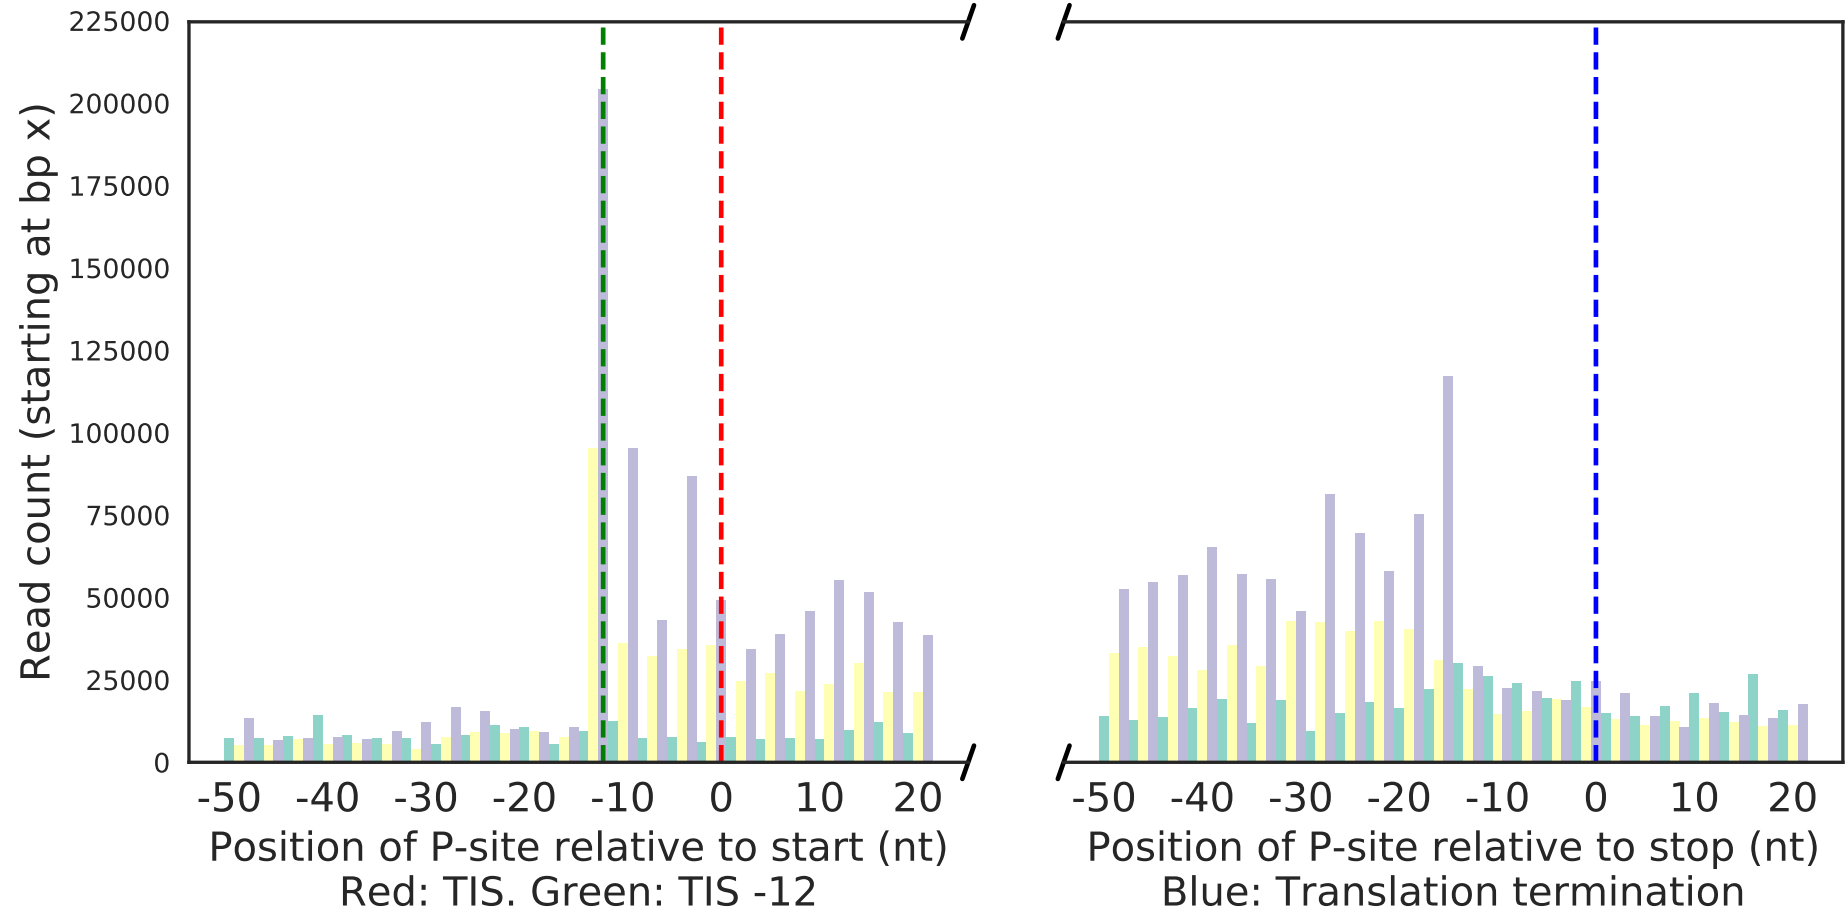

LV1S4. length: 33

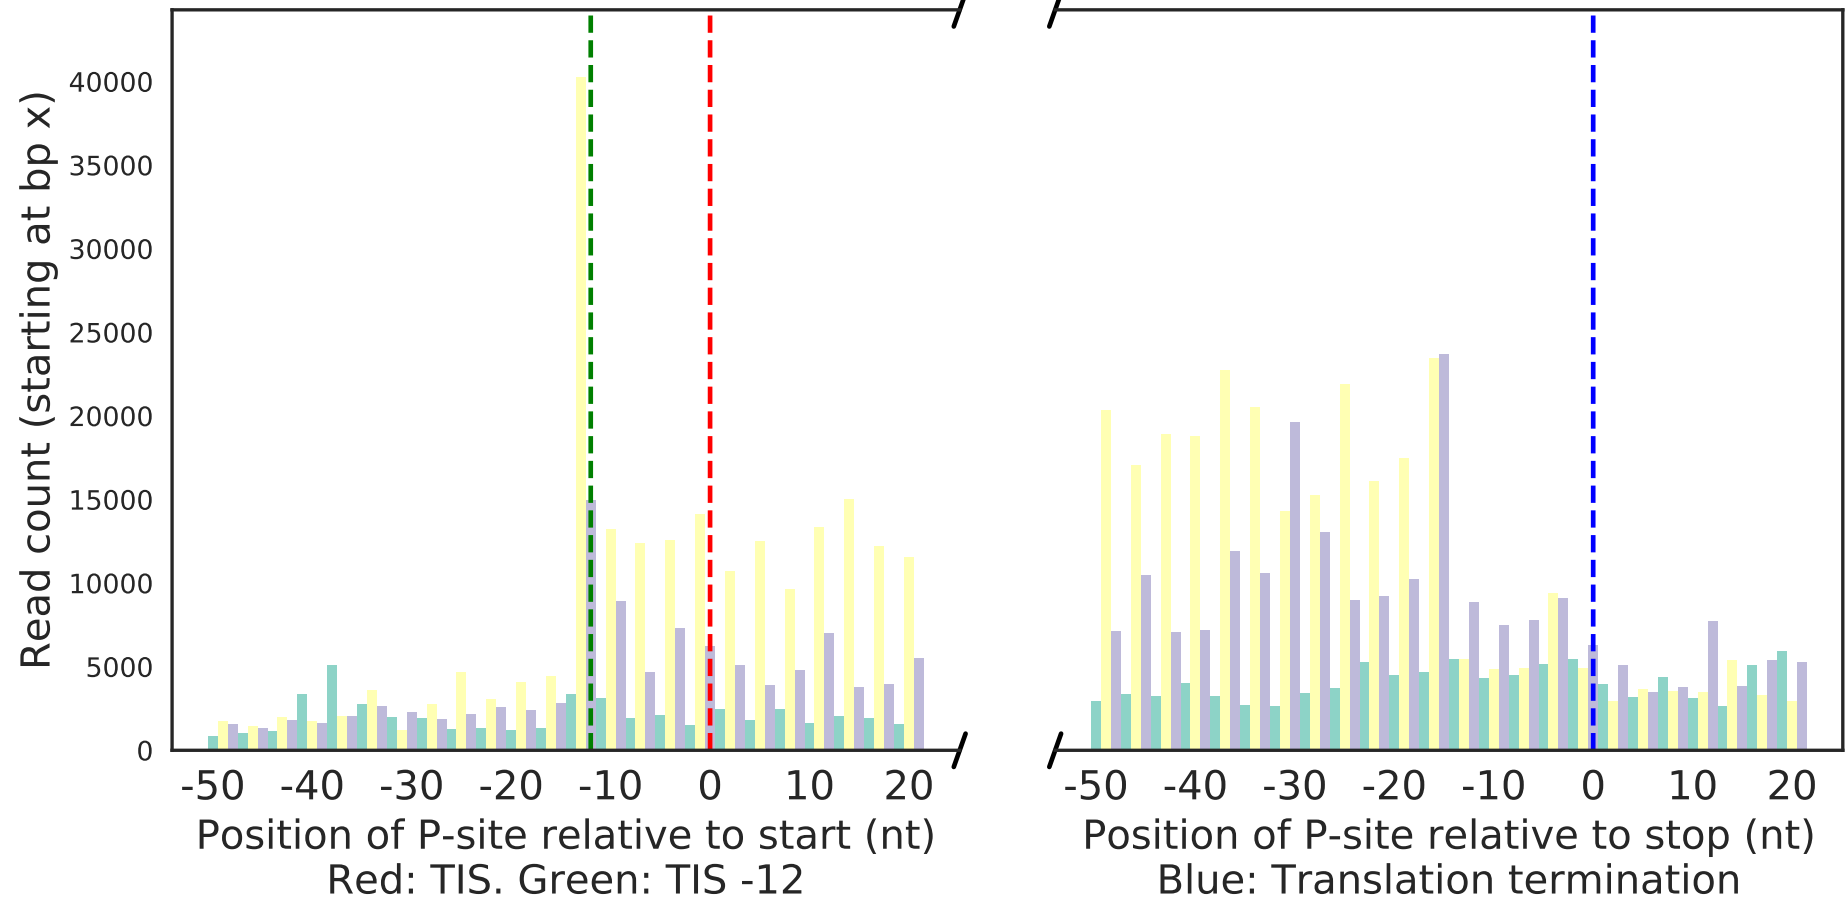

LV1S4. length: 35

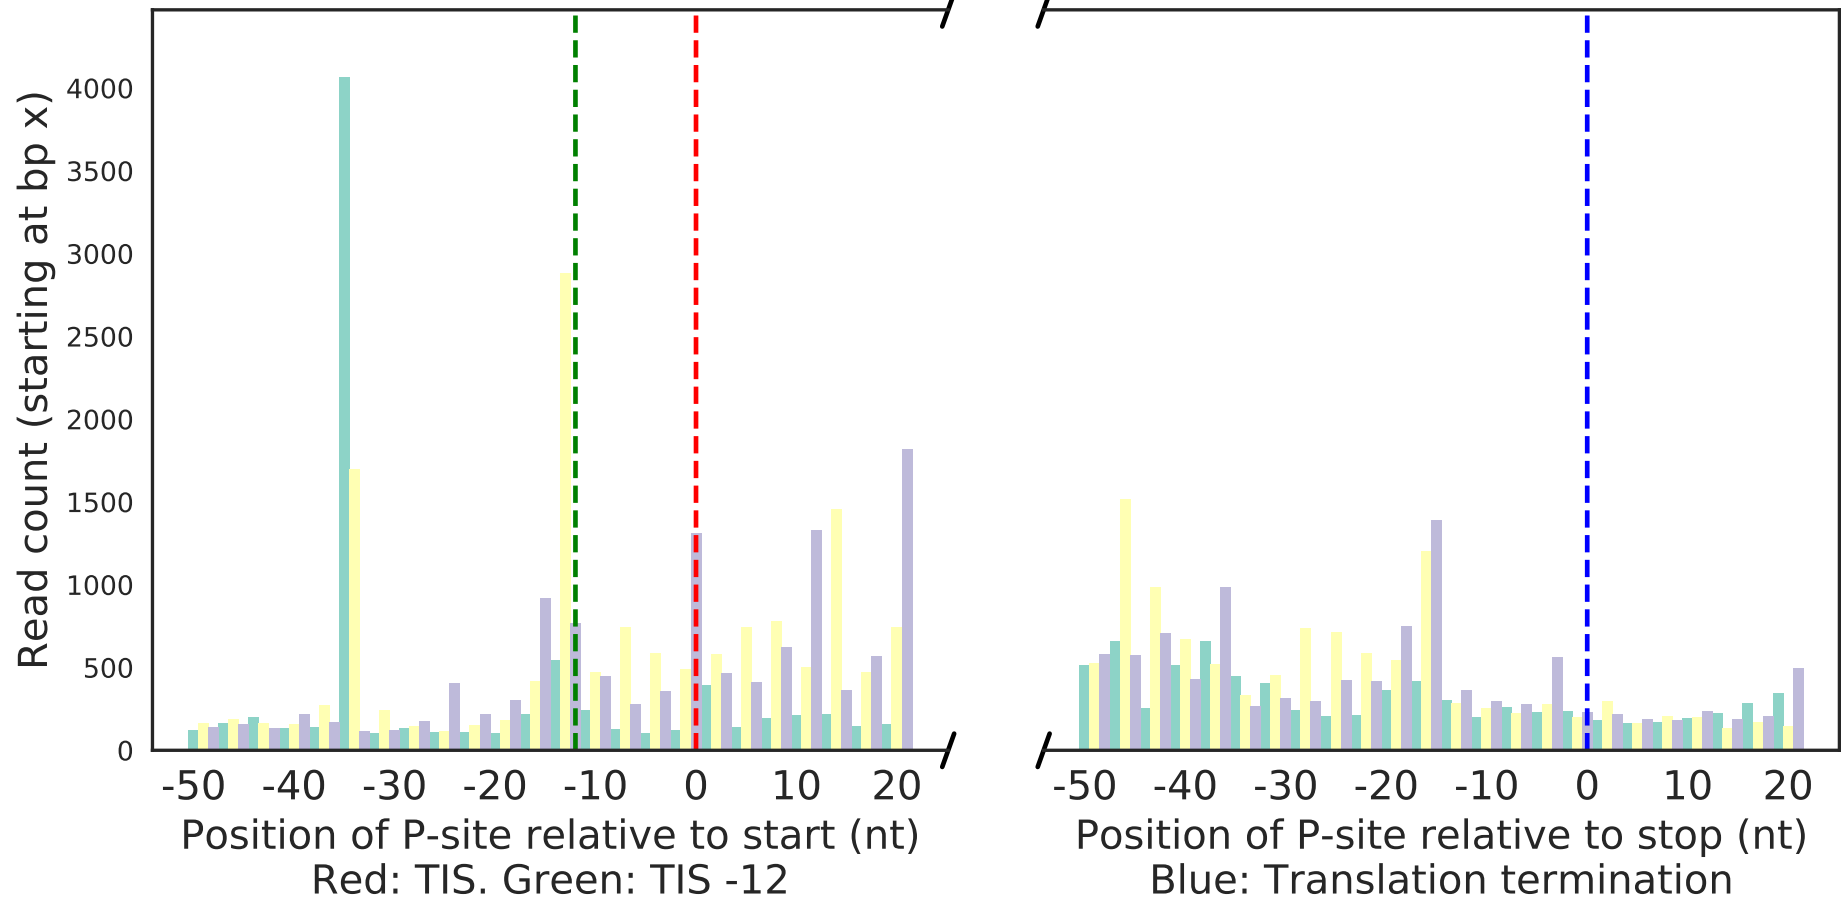

CTRL. length: 23

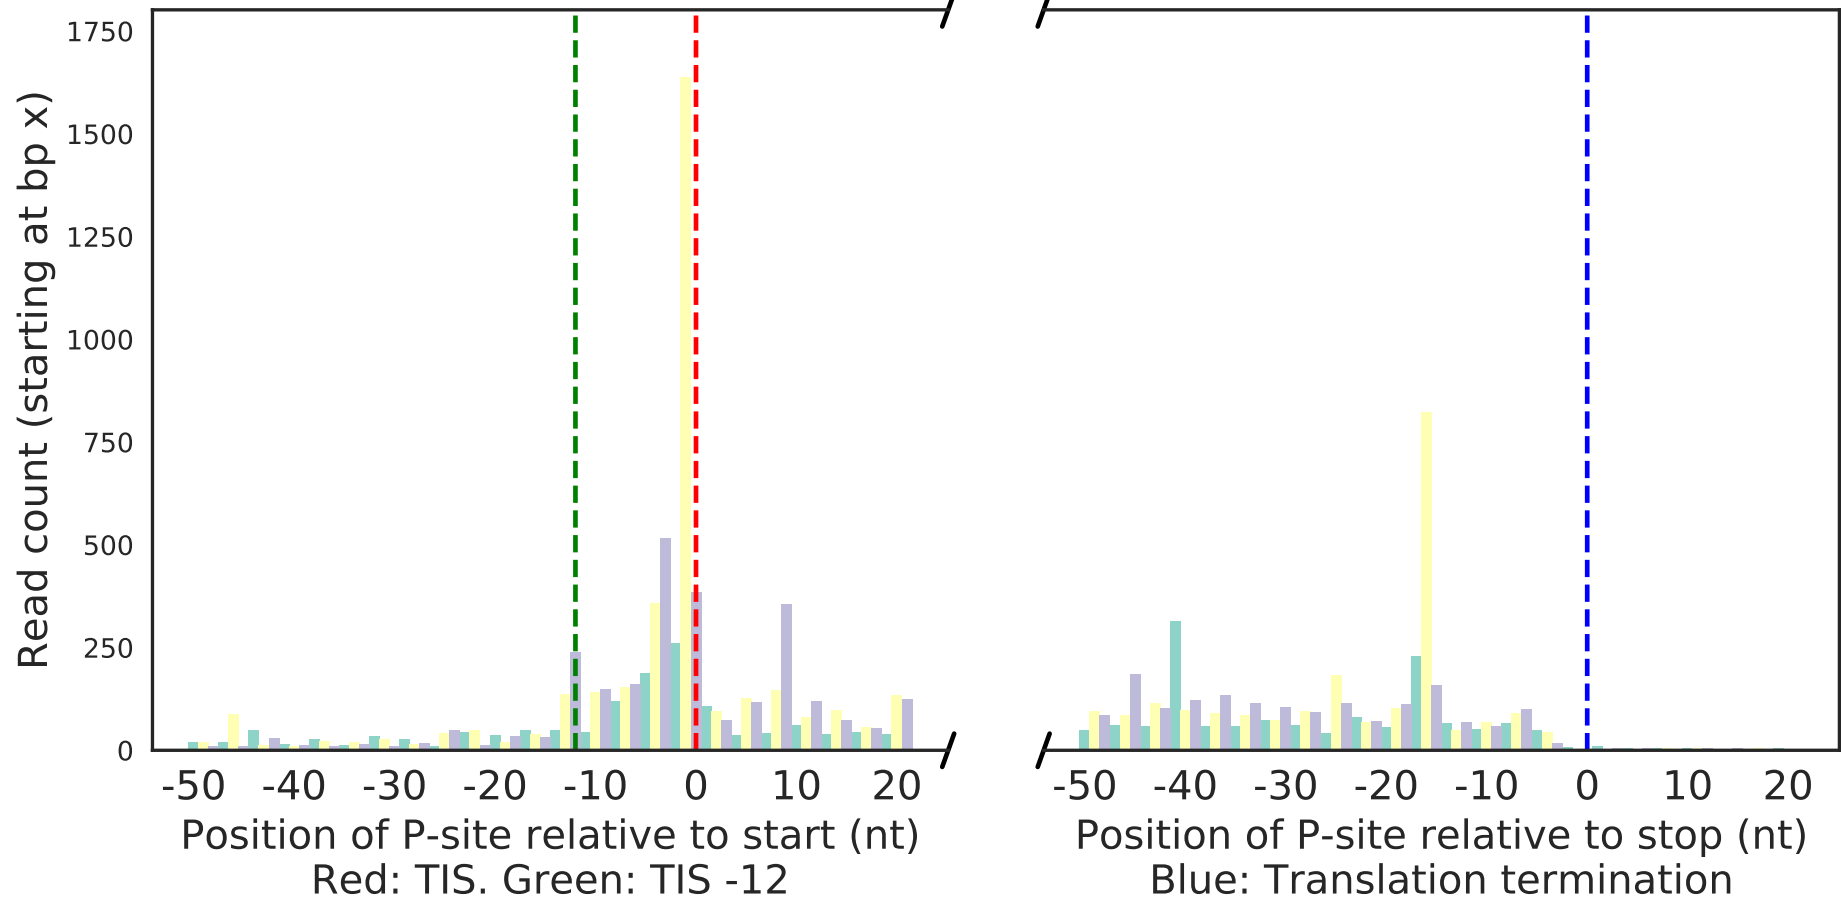

CTRL. length: 25

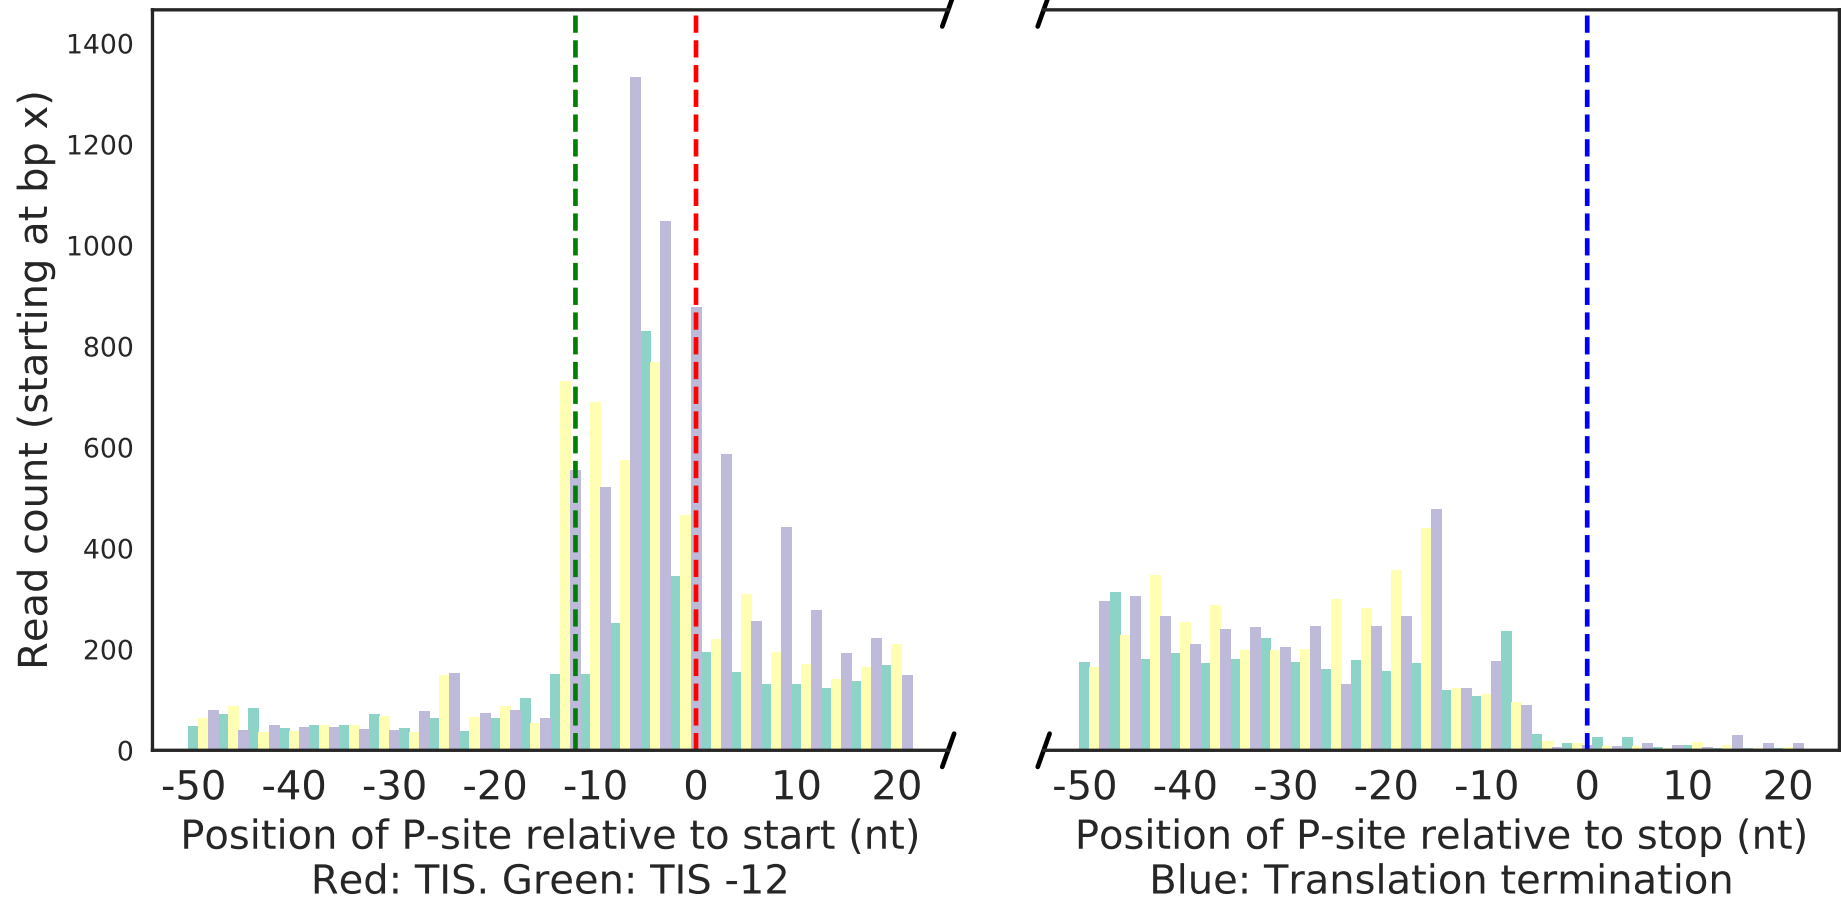



CTRL. length: 26

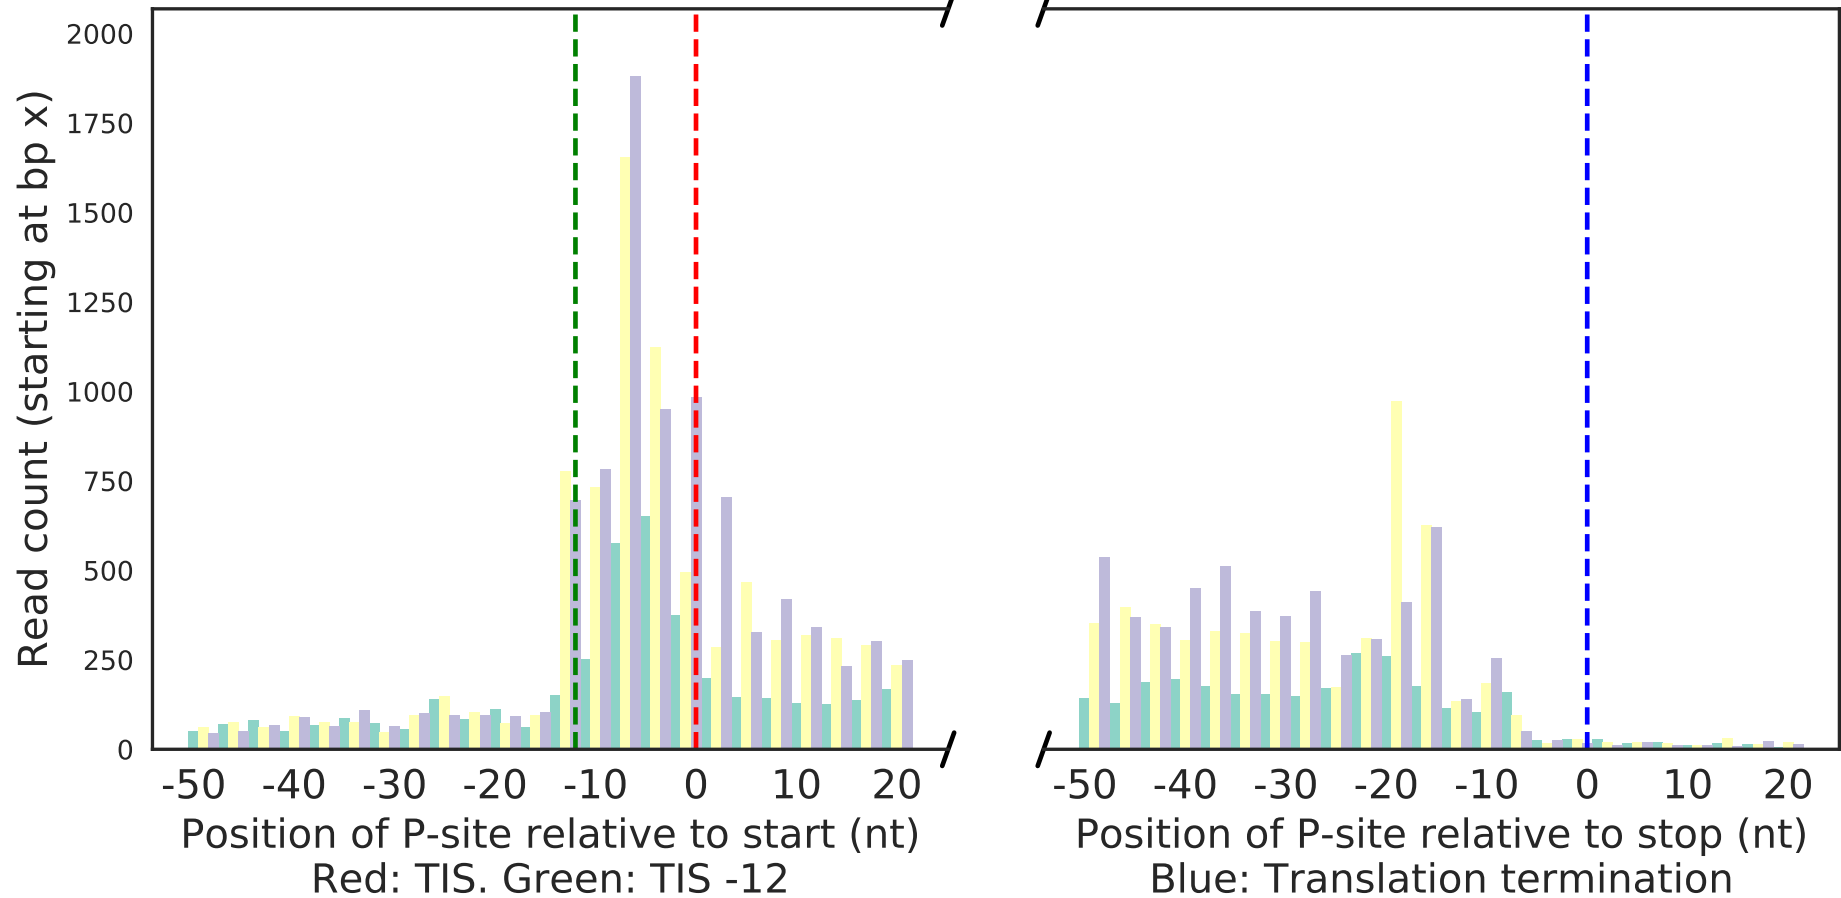

CTRL. length: 32

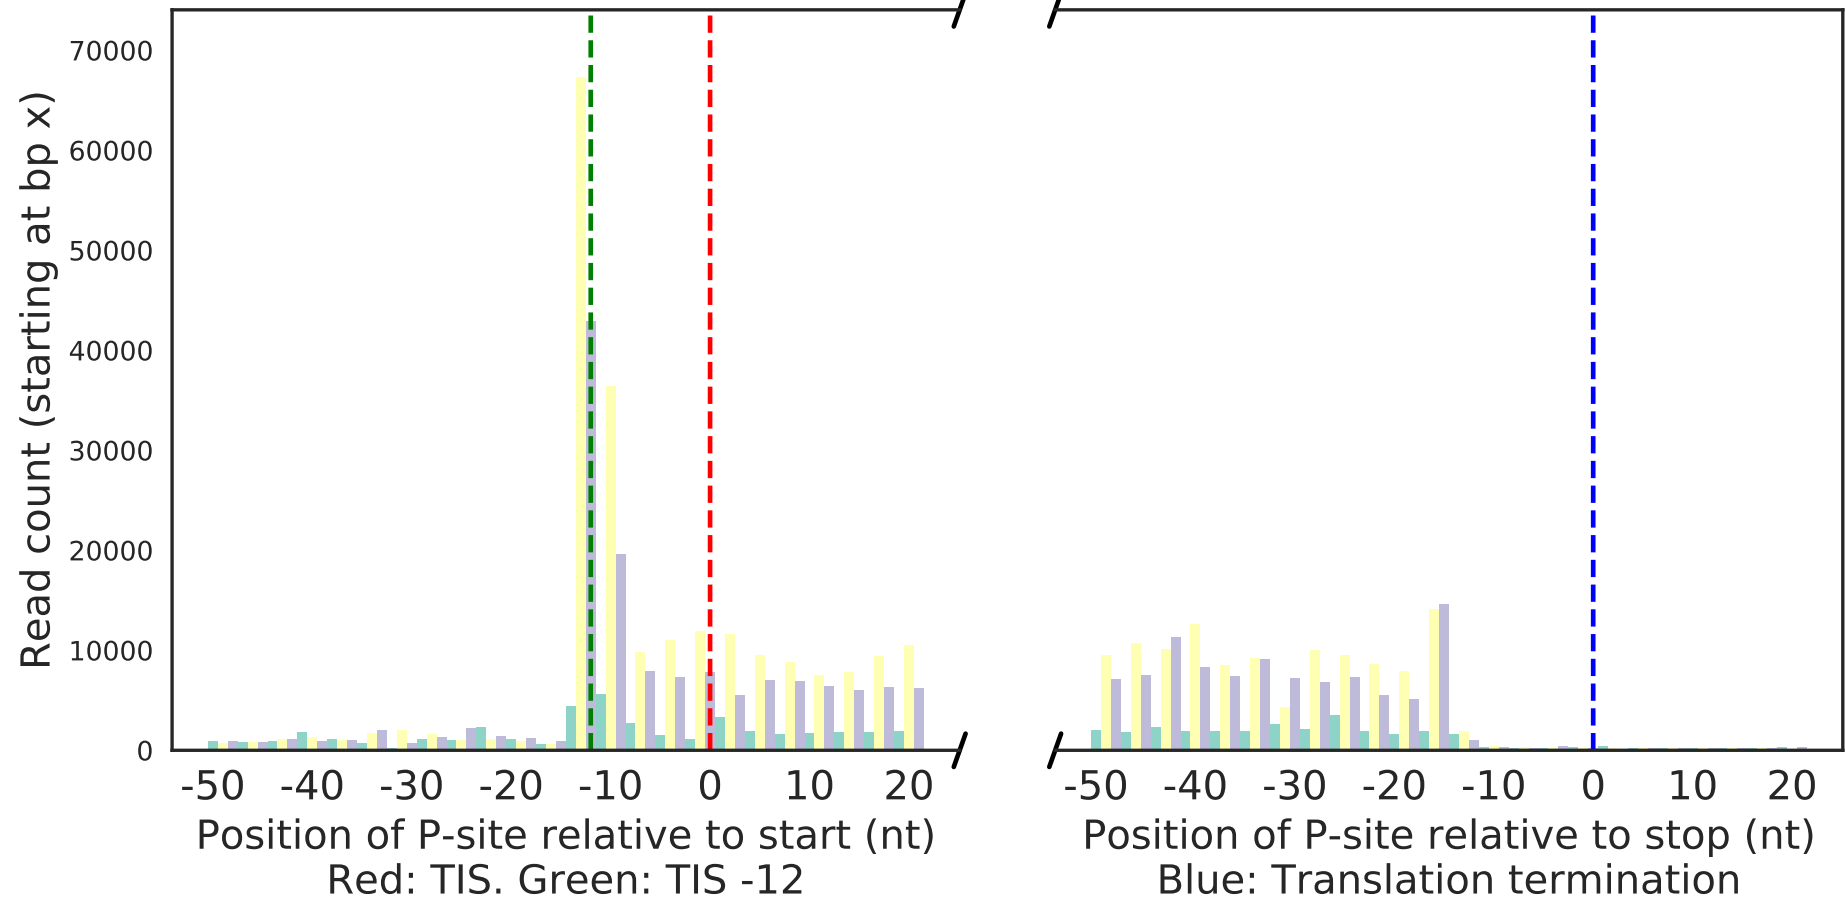

CTRL. length: 33

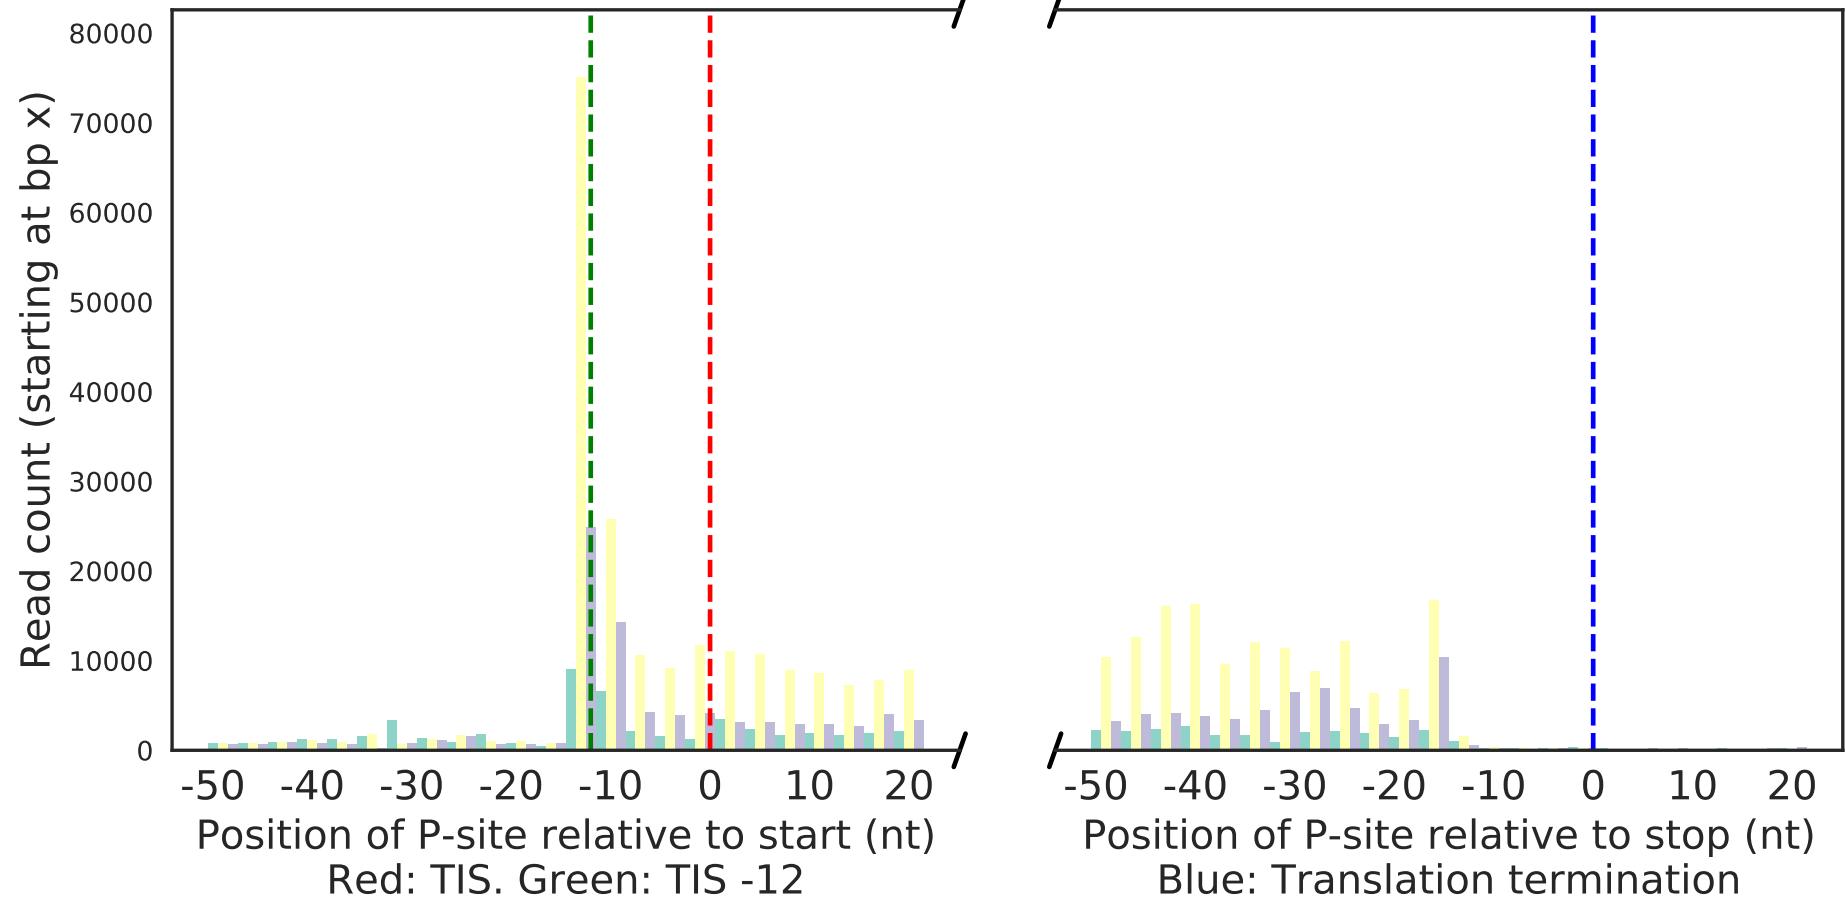

CTRL. length: 34

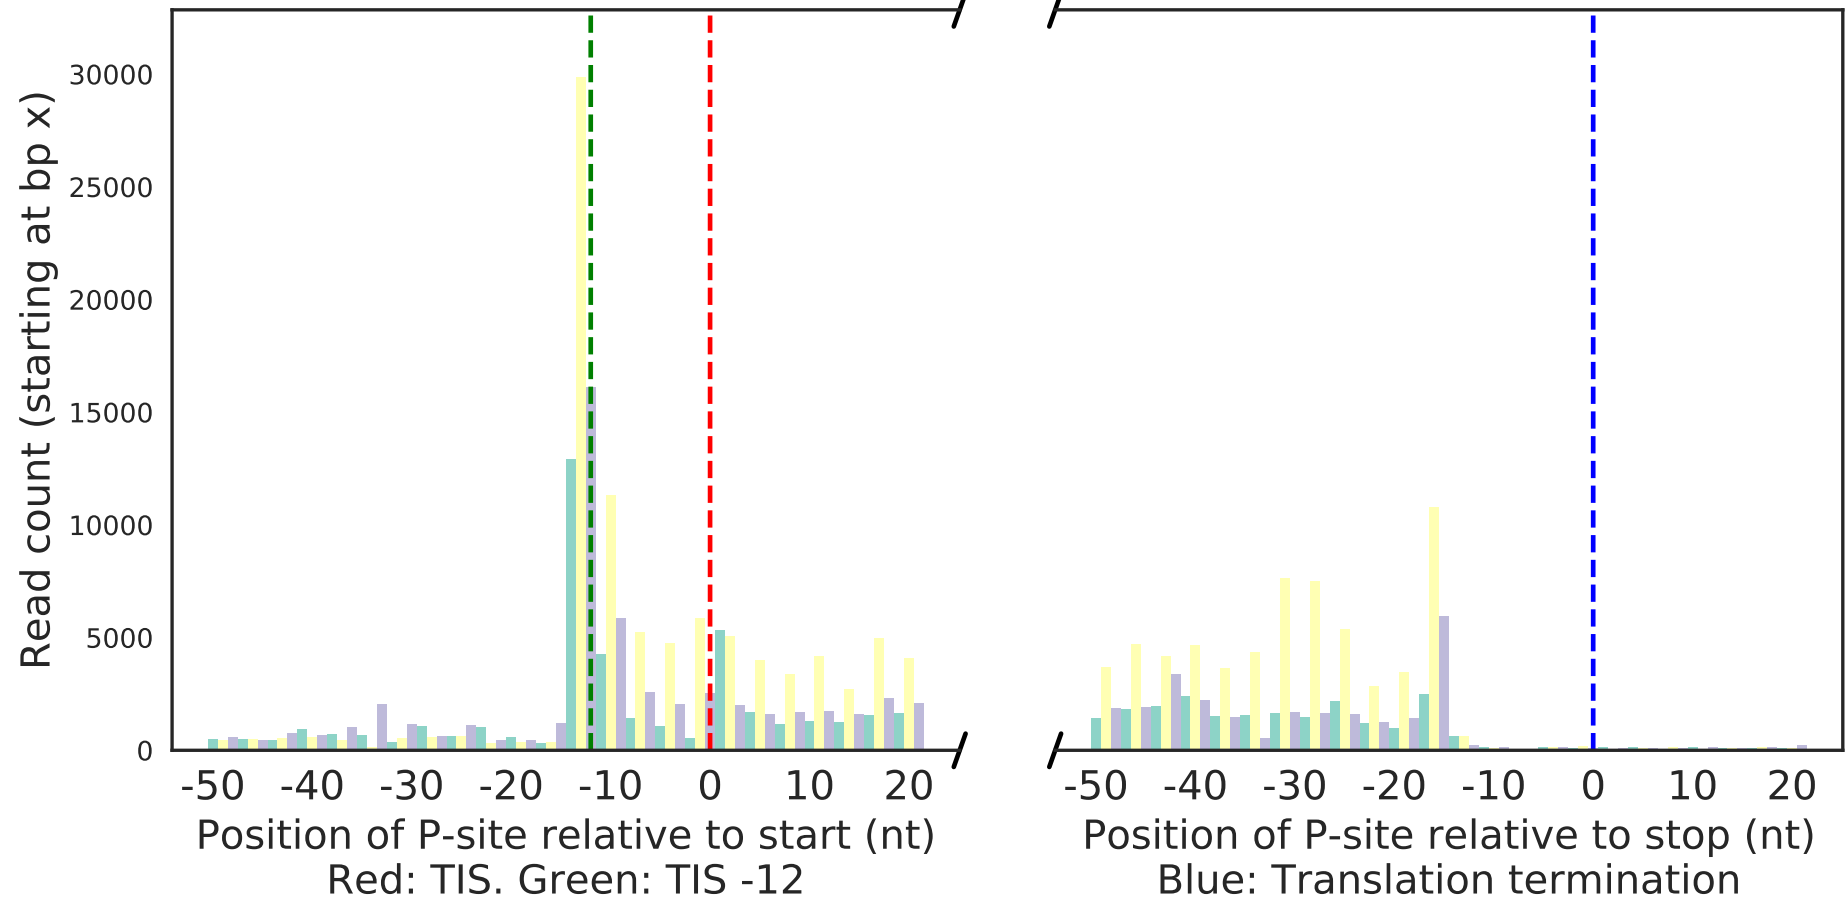

CTRL. length: 35

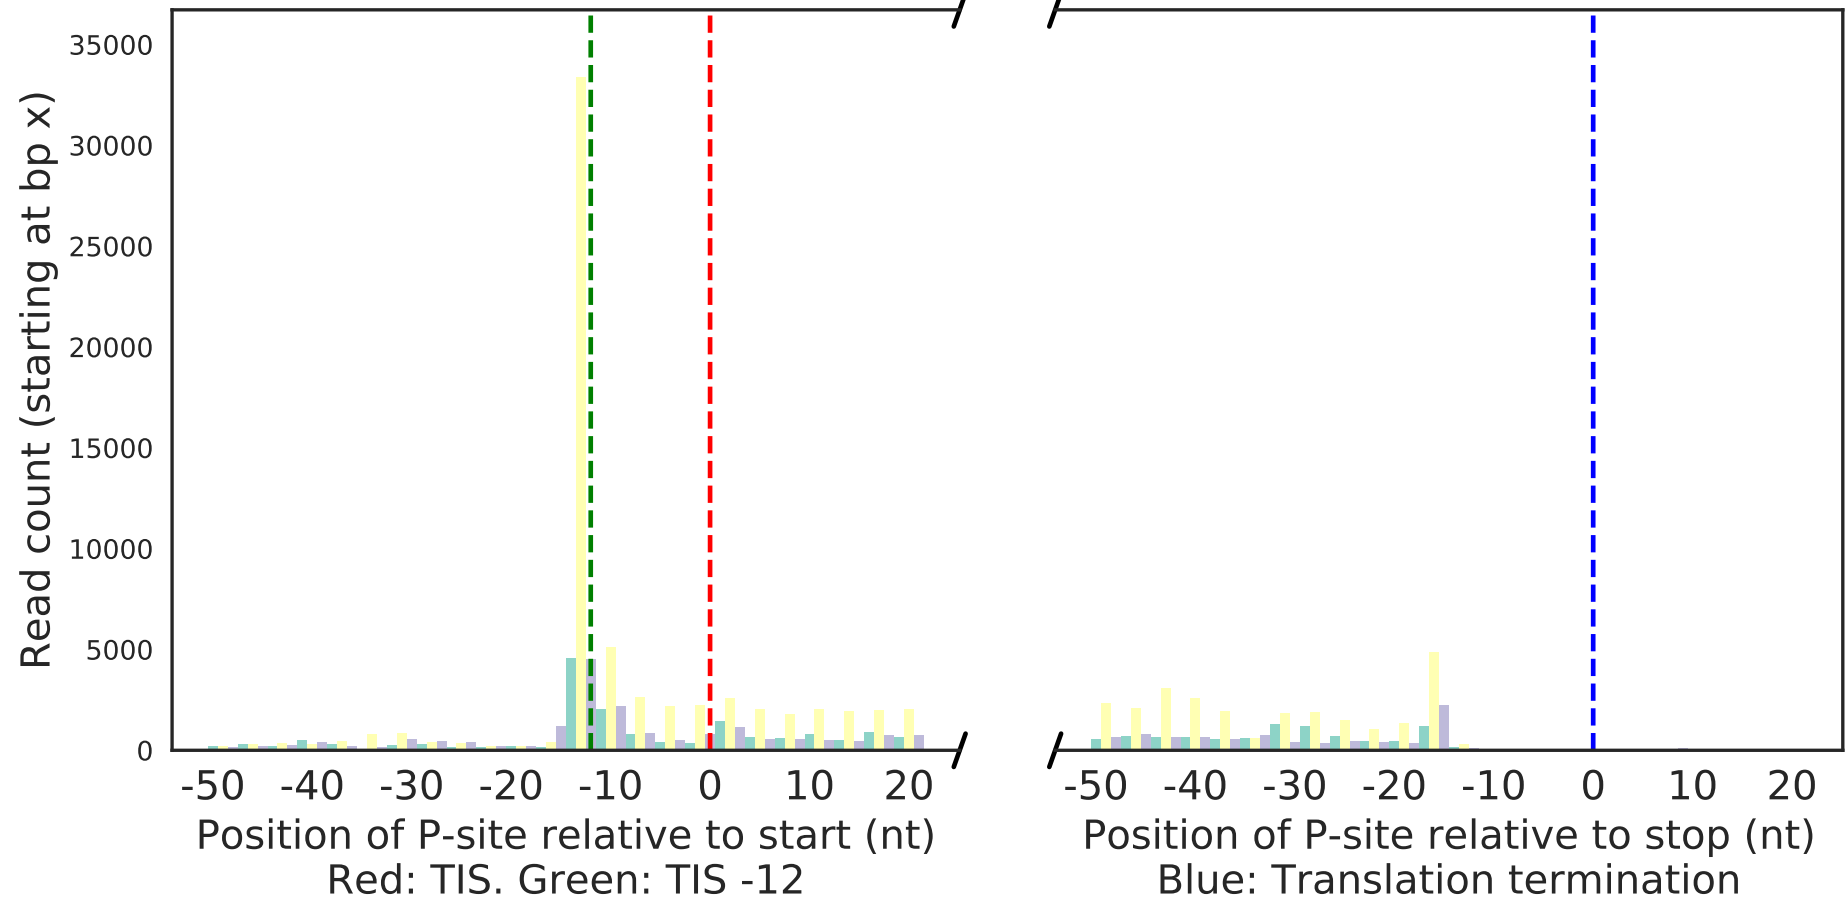

CTRL. length: 36

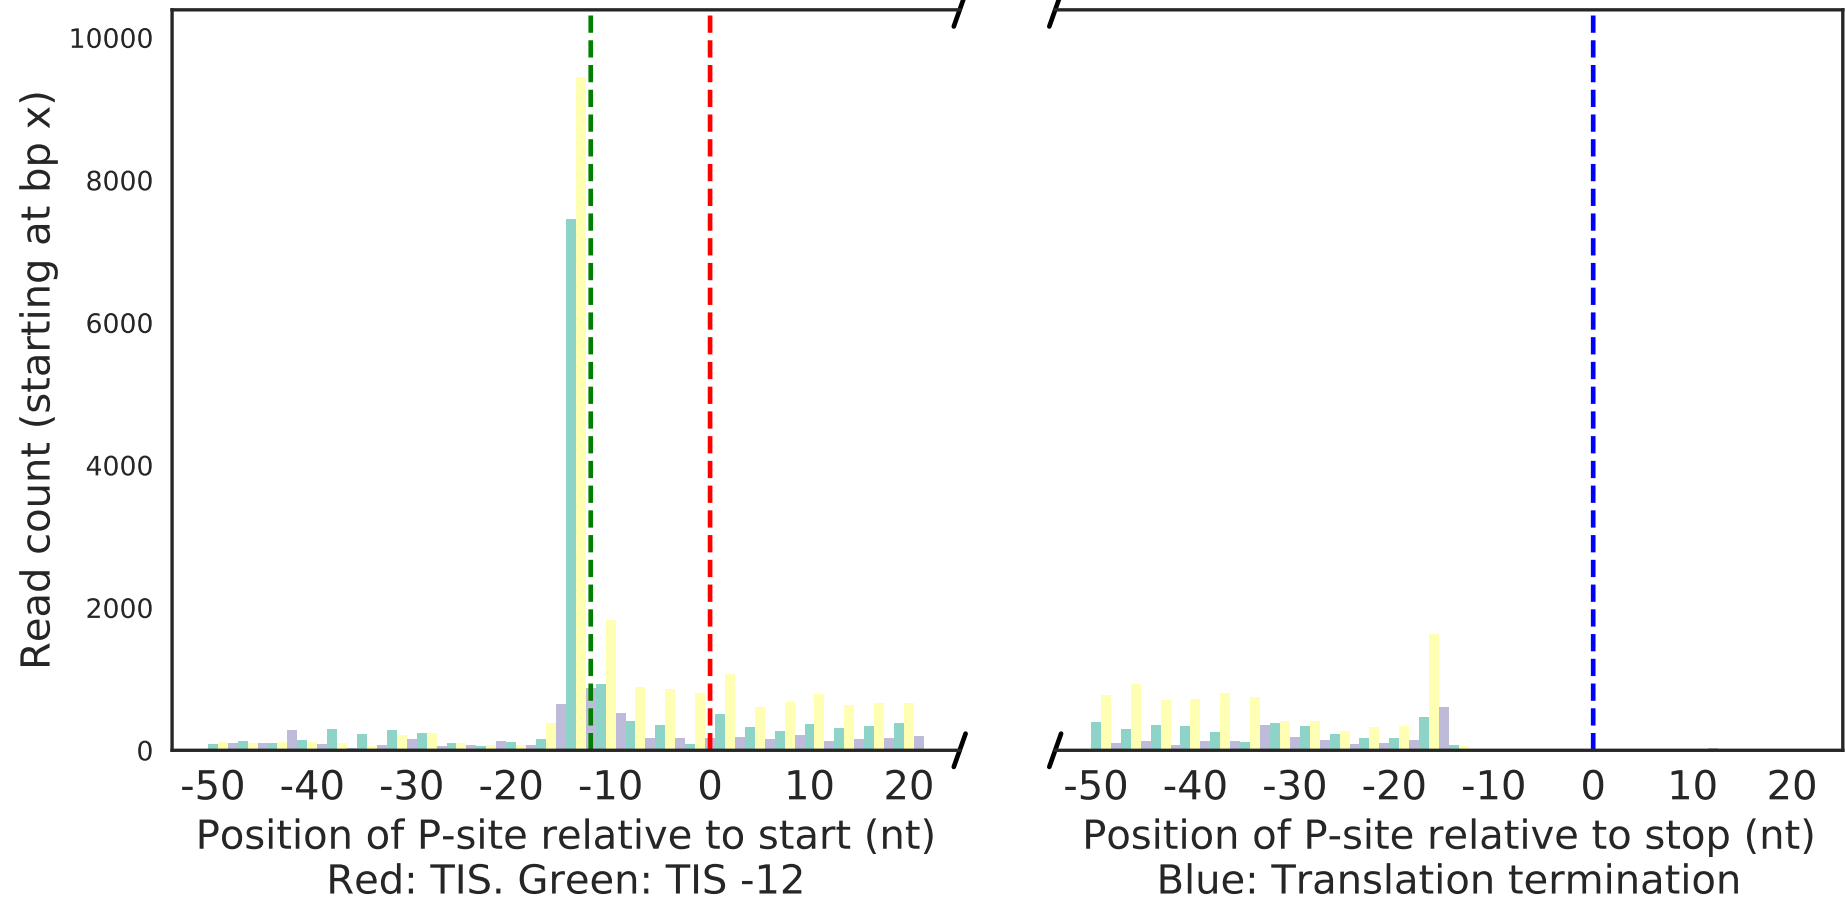

Supplement: res-125-431-s001.pdf [file res-125-431-s001.pdf]
